# Supplementary material for: Use of geofencing interventions in population health research: a scoping review
Source: PubMed Central journal article supplement — BMJ Open. 2023 Aug 3;13(8):e069374. doi: 10.1136/bmjopen-2022-069374 (PMC10401224; doi:10.1136/bmjopen-2022-069374), 2023-08-03

# BMJ Open

BMJ Open is committed to open peer review. As part of this commitment we make the peer review history of every article we publish publicly available.

When an article is published we post the peer reviewers' comments and the authors' responses online. We also post the versions of the paper that were used during peer review. These are the versions that the peer review comments apply to.

The versions of the paper that follow are the versions that were submitted during the peer review process. They are not the versions of record or the final published versions. They should not be cited or distributed as the published version of this manuscript.

BMJ Open is an open access journal and the full, final, typeset and author-corrected version of record of the manuscript is available on our site with no access controls, subscription charges or pay-per-view fees (<http://bmjopen.bmj.com>).

If you have any questions on BMJ Open's open peer review process please email [info.bmjopen@bmj.com](mailto:info.bmjopen@bmj.com)

# BMJ Open

## Use of Geofencing Interventions in Population Health Research: A Systematic Scoping Review

|                               |                                                                                                                                                                                                                                                                                                                                                                                                                                                                                               |
|-------------------------------|-----------------------------------------------------------------------------------------------------------------------------------------------------------------------------------------------------------------------------------------------------------------------------------------------------------------------------------------------------------------------------------------------------------------------------------------------------------------------------------------------|
| Journal:                      | <i>BMJ Open</i>                                                                                                                                                                                                                                                                                                                                                                                                                                                                               |
| Manuscript ID                 | bmjopen-2022-069374                                                                                                                                                                                                                                                                                                                                                                                                                                                                           |
| Article Type:                 | Original research                                                                                                                                                                                                                                                                                                                                                                                                                                                                             |
| Date Submitted by the Author: | 02-Dec-2022                                                                                                                                                                                                                                                                                                                                                                                                                                                                                   |
| Complete List of Authors:     | Tobin, Karin ; Johns Hopkins University Bloomberg School of Public Health, Health, Behavior and Society<br>Heidari, Omeid; University of Washington Seattle Campus<br>Volpi, Connor; Johns Hopkins University Bloomberg School of Public Health, Health, Behavior and Society<br>Sodder, Shereen; Johns Hopkins University Bloomberg School of Public Health, Health, Behavior and Society<br>Duncan, Dustin; Columbia University Mailman School of Public Health, Department of Epidemiology |
| Keywords:                     | EPIDEMIOLOGY, HIV & AIDS < INFECTIOUS DISEASES, MENTAL HEALTH, PUBLIC HEALTH                                                                                                                                                                                                                                                                                                                                                                                                                  |
|                               |                                                                                                                                                                                                                                                                                                                                                                                                                                                                                               |

SCHOLARONE™  
Manuscripts

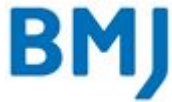

I, the Submitting Author has the right to grant and does grant on behalf of all authors of the Work (as defined in the below author licence), an exclusive licence and/or a non-exclusive licence for contributions from authors who are: i) UK Crown employees; ii) where BMJ has agreed a CC-BY licence shall apply, and/or iii) in accordance with the terms applicable for US Federal Government officers or employees acting as part of their official duties; on a worldwide, perpetual, irrevocable, royalty-free basis to BMJ Publishing Group Ltd ("BMJ") its licensees and where the relevant Journal is co-owned by BMJ to the co-owners of the Journal, to publish the Work in this journal and any other BMJ products and to exploit all rights, as set out in our [licence](#).

The Submitting Author accepts and understands that any supply made under these terms is made by BMJ to the Submitting Author unless you are acting as an employee on behalf of your employer or a postgraduate student of an affiliated institution which is paying any applicable article publishing charge ("APC") for Open Access articles. Where the Submitting Author wishes to make the Work available on an Open Access basis (and intends to pay the relevant APC), the terms of reuse of such Open Access shall be governed by a Creative Commons licence – details of these licences and which [Creative Commons](#) licence will apply to this Work are set out in our licence referred to above.

Other than as permitted in any relevant BMJ Author's Self Archiving Policies, I confirm this Work has not been accepted for publication elsewhere, is not being considered for publication elsewhere and does not duplicate material already published. I confirm all authors consent to publication of this Work and authorise the granting of this licence.

1  
2  
3 1 **Use of Geofencing Interventions in Population Health Research: A Systematic Scoping**  
4 2 **Review**  
5 3

6 4 Karin E. Tobin, PhD<sup>a\*</sup>

7 5 Omeid Heidari, PhD<sup>b\*</sup>

8 6 Connor Volpi, MPH<sup>a</sup>

9 7 Shereen Sodder, MSPH<sup>a</sup>

10 8 Dustin T. Duncan, PhD<sup>c</sup>

11 9  
12 10  
13 11 <sup>a</sup>Department of Health, Behavior and Society, John Hopkins University Bloomberg School of  
14 12 Public Health, Baltimore, MD

15 13 <sup>b</sup>Department of Mental Health, John Hopkins University Bloomberg School of Public Health,  
16 14 Baltimore, MD

17 15 <sup>c</sup>Department of Epidemiology, Columbia University Mailman School of Public Health, New  
18 16 York, NY

19 17  
20 18 \*Co-first authors  
21 19  
22 20  
23 21  
24 22  
25 23  
26 24  
27 25  
28 26  
29 27  
30 28

31 21 **Correspondence:** Karin Tobin, PhD, Department of Health, Behavior and Society, John  
32 22 Hopkins University Bloomberg School of Public Health, 2213 McElderry Street, 2nd Floor,  
33 23 Baltimore, Maryland 21205  
34 24

35 25 Ktobin2@jhu.edu  
36 26  
37 27  
38 28  
39 29  
40 30  
41 31  
42 32  
43 33  
44 34  
45 35  
46 36  
47 37  
48 38  
49 39  
50 40  
51 41  
52 42  
53 43  
54 44  
55 45  
56 46  
57 47  
58 48  
59 49  
60 50

61 27 **Word Count Manuscript: 2945**  
62 28

1  
2  
3 29 **Use of Geofencing Interventions in Population Health Research: A Systematic Scoping**  
4 30 **Review**

5 31  
6 32  
7 33 **Key Points**

9  
10 34 **Question**

11  
12 35 What geofencing interventions have been implemented in population health research?  
13  
14  
15 36

16  
17 37 **Findings**

18  
19 38 The majority of the 9 studies included in this systematic scoping review were published in the  
20  
21 39 five years preceding the search (89%). Geofences in most studies (n=5) were fixed and  
22  
23 40 programmed in the mobile application carried by participants without their input. Intervention  
24  
25 41 delivery of geofencing interventions were classified as direct or indirect with five studies (56%)  
26  
27 42 being found to have utilized direct interventions.  
28  
29 43

30  
31 44 **Meaning**

32  
33 45 This review found geofencing to be an emerging technology that is an acceptable and feasible  
34  
35 46 intervention.  
36  
37 47

## 48 **Abstract**

### 49 **Importance**

50 Technological advancements that utilize global positioning system (GPS), such as geofencing,  
51 provide the opportunity to examine place-based context in population health research. However,  
52 systematic review of the use of geofencing intervention research is lacking.

### 54 **Objectives**

55 To systematically identify, assess, and synthesize the existing evidence on geofencing  
56 intervention design, acceptability, feasibility, and/or impact.

### 58 **Evidence Review**

59 Searches were conducted in PubMed, CINAHL, EMBASE Web of Science, Cochrane, and  
60 PsychINFO for articles in English published by December 31<sup>st</sup>, 2021. This systematic scoping  
61 review examined existing literature and excluded articles that met the following criteria: 1) a  
62 component or combination of global positioning system (GPS), geographic information system  
63 (GIS), or ecological momentary assessment (EMA) was utilized without delivery of an  
64 intervention; 2) did not include a health or health-related outcome from the geofencing  
65 intervention; or 3) was not a peer-reviewed study. Several researchers independently reviewed  
66 all abstracts and full-text articles prior to their final inclusion.

### 68 **Findings**

69 Using the search strategy in six databases, a total of 2171 articles were found. Nine studies were  
70 included. The majority were published in five years preceding the search (89%). Geofences in

1  
2  
3 71 most studies (n=5) were fixed and programmed in the mobile application carried by participants  
4  
5 72 without their input. Mechanisms of geofencing interventions were classified as direct or indirect  
6  
7  
8 73 with five studies (56%) being found to have utilized direct interventions. Of note, there was not a  
9  
10 74 consistent health outcome (from smoking to problematic alcohol use) across the five studies that  
11  
12 75 utilized an direct geofencing intervention and four studies utilized a behavioral mechanism in  
13  
14 76 their geofencing intervention.  
15  
16  
17 77  
18

## 19 78 **Conclusions and Relevance**

20  
21 79 This review found geofencing to be an emerging technology that is an acceptable and feasible  
22  
23 80 intervention. Moreover, geofencing interventions have been applied to various populations and  
24  
25 81 health outcomes. However, future studies should be specific about the rationale for the type of  
26  
27 82 locations that are geofenced and the user input. Moreover, attention to the mechanisms of actions  
28  
29 83 will enable the field to understand not only whether geofencing is an appropriate and effective  
30  
31 84 intervention but why it works to achieve the outcomes we observe.  
32  
33  
34  
35  
36  
37  
38  
39  
40  
41  
42  
43  
44  
45  
46  
47  
48  
49  
50  
51  
52  
53  
54  
55  
56  
57  
58  
59  
60

1  
2  
3 85 **Strengths and Limitations**  
4

- 5 86 • This scoping review focused on hypothesized mechanisms of action.  
6  
7  
8 87 • The number of published studies that met criteria were limited and did not assess impact of  
9  
10 88 the intervention.  
11  
12  
13  
14  
15  
16  
17  
18  
19  
20  
21  
22  
23  
24  
25  
26  
27  
28  
29  
30  
31  
32  
33  
34  
35  
36  
37  
38  
39  
40  
41  
42  
43  
44  
45  
46  
47  
48  
49  
50  
51  
52  
53  
54  
55  
56  
57  
58  
59  
60

For peer review only



## 89 Introduction

90 Population health outcomes and health disparities result from multi-level factors beyond  
91 the individual. For example, poverty can lead to a lack of access to healthy food<sup>1</sup> and medical  
92 care<sup>2</sup>; unstable housing can lead to inability to adhere to medications<sup>3</sup> and exposures to  
93 unhealthy environments<sup>4</sup>; homophobia and racism leads to stigma and discrimination, and  
94 mistrust and avoidance of medical systems.<sup>5-7</sup>

95 Often in behavioral research, theories or frameworks do not consider the place-based  
96 context of behavior despite literature on the consistent and enduring impact of places such as  
97 neighborhoods and communities on population health outcomes and disparities.<sup>8-10</sup> Place-based  
98 context can be conceptualized as both geographic areas defined by boundaries or as socially  
99 constructed out of symbolic meanings *and* social relations.<sup>11,12</sup> In both cases, place-based context  
100 operates to perpetuate hierarchical social structures, facilitate and constrain resources, and  
101 protect or hinder health. Moreover, place-based context may facilitate specific health-related  
102 interactions such as drug or alcohol use, experiences of violence, or engagement in  
103 healthcare. Yet behavioral interventions often conceptualize place-based context as static (e.g.,  
104 place of risky sex) and do not consider how place-based contexts vary over time. Real-time  
105 geospatial methods, including the use of global positioning system (GPS) technology, are the  
106 cutting-edge, best-suited methods to overcome limitations of most neighborhoods and other  
107 environments health research because they better capture place-based contexts corresponding to  
108 individuals' lived experiences, referred to as "activity space".<sup>14-13</sup>

109 There are numerous types of GPS-based methods that collect data from individuals and in  
110 some cases deliver intervention content. For example, ecological momentary assessment (EMA)  
111 has been shown to be an acceptable method of data collection.<sup>14</sup> Ecological Momentary

1  
2  
3 112 Interventions (EMI) allow researchers to deliver intervention content through mobile devices.<sup>15</sup>  
4  
5 113 Just-in-time adaptive interventions (JITAI) attempt to address the changing needs of an individual  
6  
7 114 where the intervention algorithm is programmed to determine if and what intervention content  
8  
9 115 should be delivered to participants at set times throughout the day, whenever a participant  
10  
11 116 requests one, or based on the participant's current state (e.g., stress) or environmental changes  
12  
13 117 (e.g., weather).<sup>16-17</sup> Finally, geofences are virtual boundaries drawn around a location and allow  
14  
15 118 for monitoring and messaging when individuals enter or exits the geofenced parameter.<sup>18</sup>  
16  
17 119 Geofencing interventions are a subset of JITAI where there is continuous monitoring of the  
18  
19 120 participant's location using GPS and delivery of an intervention based on a spatial context  
20  
21 121 trigger.

22  
23  
24 122       Reviews of JITAI and EMI show the promising potential of this evolving technology<sup>19-21</sup>,  
25  
26 123 yet, such reviews are noted to lack the inclusion of geofencing, representing a major gap in the  
27  
28 124 literature. This gap is vital to address as geofencing has the capability to address an array of  
29  
30 125 different health issues ranging from tobacco cessation to HIV medication adherence. The lack of  
31  
32 126 a clear and systematic understanding of the scope of geofencing interventions undermines its  
33  
34 127 potential to impact population health. The purpose of this systematic scoping review is to  
35  
36 128 describe of the state of the evidence on geofencing intervention design, acceptability, feasibility,  
37  
38 129 and impact. In addition, we examine what behavioral mechanisms were targeted across the  
39  
40 130 interventions assessed, as discussed below.

41  
42 131  
43  
44 132 *Conceptualizing mechanisms of action*

45  
46 133 Another limitation in the literature of EMA and JITAI interventions is the lack of attention to  
47  
48 134 specific mechanisms of action that operate to achieve outcomes.<sup>22</sup> Therefore, we sought to

1  
2  
3 135 develop a framework based on several complementary theories and frameworks (e.g., Turan's  
4  
5 136 HIV Stigma Framework and Social Cognitive Theory<sup>23-25</sup>) to evaluate geofencing interventions  
6  
7  
8 137 included in this review. The framework posits three key mechanisms operate for place-based  
9  
10 138 context to influence health outcomes (Figure 1). Each mechanism has both a protective and risk  
11  
12 139 dimension. The Cognitive mechanism includes cognitive processes such as sense of control,  
13  
14 140 knowledge, attitudes, self-efficacy, maladaptive thoughts, risk perceptions and internalized  
15  
16 141 stigma.<sup>26-31</sup> The Behavioral mechanism refers to both protective behaviors such as adaptive  
17  
18 142 coping as well as risky behaviors such substance use, condomless sex and non-adherence to  
19  
20 143 medication and care.<sup>32-34</sup> <sup>35</sup> The Social mechanism refers to interactions with others in the  
21  
22 144 personal social networks and broader community such as emotional or instrumental support or  
23  
24 145 enacted stigma and conflict which have been shown to exacerbate or mitigate health outcomes.<sup>36-</sup>  
25  
26 146 <sup>38</sup> The framework can be applied to multiple spatial scales from a micro-level (e.g. a room in  
27  
28 147 one's residence) to community-level (e.g. a neighborhood activity space or census tract) to  
29  
30 148 macro (e.g. state, region).

31 [Figure 1 here]

32  
33  
34 150

## 35 151 **Methods**

36  
37  
38 152 This systematic review was conducted in accordance with the 2018 PRISMA Extension for  
39  
40 153 Scoping Reviews checklist.<sup>39</sup>

41  
42  
43 154

### 44 155 *Patient and public involvement*

45 156 No patient involved.

46  
47  
48 157

1  
2  
3 158 *Inclusion criteria*  
4

5 159 Articles were only included if they included if geofencing was utilized as a mechanism for  
6  
7 160 intervention delivery. Articles were excluded if 1) a component or combination of GPS,  
8  
9 161 geographic information system (GIS), or ecological momentary assessment (EMA) was utilized  
10  
11 162 without delivery of an intervention; 2) did not include a health or health-related outcome from  
12  
13 163 the geofencing intervention; or 3) was not a peer-reviewed study.  
14  
15  
16  
17 164

18  
19 165 *Search strategy*  
20

21 166 Authors first met to develop the list of potential search terms and refined after initial searches  
22  
23 167 were conducted. Then searches were conducted in PubMed, CINAHL, EMBASE Web of  
24  
25 168 Science, Cochrane, and PsychINFO for articles published through the end of 2021 (Appendix 1).  
26  
27 169 Search terms were for broad concepts regarding mobile delivery of a geofencing intervention:  
28  
29 170 “Geographic Information Systems”; “Georeferencing”; “Global Positioning System”; or  
30  
31 171 “Geofenc\*” combined with “Smartphone” or “Mobile Applications.” The search was conducted  
32  
33 172 on 12/1/2022 and was not registered. A protocol was not prepared.  
34  
35  
36  
37 173

38  
39  
40 174 *Study selection*  
41

42 175 Screening of article titles and abstracts was conducted with two reviewers (SS, CV) in maximize  
43  
44 176 scrutiny of all records. Each reviewer independently screened all articles identified from the  
45  
46 177 initial search for relevance to the pre-defined inclusion criteria that was highlighted during a  
47  
48 178 training session where it was emphasized that the reviewers should apply a liberal approach.  
49  
50 179 Next, the same two reviewers independently reviewed each of the full texts for inclusion in the  
51  
52 180 data extraction phase. Any disagreements in both phases were adjudicated by a third reviewer  
53  
54  
55  
56  
57  
58  
59  
60

1  
2  
3 181 (OH). In all phases reviewers were not blinded to authors, funding, or information regarding  
4  
5 182 publication of all the records.  
6  
7

8 183

9  
10 184 *Data extraction*

11  
12 185 Two reviewers (OH, KT) extracted data for details of study design, target population, sample  
13  
14 186 size, duration of follow-up, theoretical framework, software or mobile application use, goal, and  
15  
16 187 mechanism of geofenced intervention, and impact of the intervention of outcomes. Place-based  
17  
18 188 mechanisms associated with the intervention included: 1) Behavioral, 2) Social support:  
19  
20 189 Emotional, Instrumental, Informational, and Social monitoring, and 3) Cognitive. Finally,  
21  
22 190 established guidance for reporting health intervention using mobile phone was utilized to  
23  
24 191 evaluate the quality of each article.<sup>40</sup>  
25  
26  
27

28 192

29  
30  
31 193 *Included studies*

32  
33 194 Using the search strategy in six identified databases, a total of 2,171 articles were found after  
34  
35 195 removing duplicates. 2,039 studies were irrelevant and 132 full text studies were assessed for  
36  
37 196 eligibility (Supplementary Figure 1). Reasons for exclusion of the 122 articles in the full-text  
38  
39 197 phases included the article not being peer reviewed (n=46), a review articles (n=19), was not the  
40  
41 198 correct study design or intervention (n=14), or utilized a combination of GPS, GIS, and or  
42  
43 199 Ecological Momentary Assessment, but was not a geofencing intervention (n=44). Nine studies  
44  
45 200 were included in this scoping review.  
46  
47  
48

49 201

50  
51 202 *Study characteristics*  
52  
53  
54  
55  
56  
57  
58  
59  
60

1  
2  
3 203 The majority were published in five years preceding the search (89%) (Supplemental Table).  
4  
5 204 Most employed a pre/post study design to assess changes in measured outcome or feasibility and  
6  
7 205 acceptability of the geofencing intervention (78%) with 2 unblinded randomized control trials.  
8  
9  
10 206 Sample sizes ranged from 4-3,443; one study's intervention quantified its reach with the  
11  
12 207 geofencing intervention displaying on 516,073 mobile phones, though these impressions do not  
13  
14 208 represent unique individuals receiving the intervention.<sup>41</sup> Most studies (78%) were conducted in  
15  
16 209 the United States, one in the United Kingdom<sup>42</sup> and one in Spain.<sup>22</sup>  
17  
18  
19 210

20  
21  
22 211 *Geofencing methods: User input*

23  
24 212 Geofences in most studies (n=5) were fixed and programmed in the mobile application without  
25  
26 213 participant input. These included hospital emergency departments<sup>18,43</sup>, hospitals where  
27  
28 214 participants worked<sup>44,45</sup>, and a specific rural dental clinic<sup>41</sup>. Two studies utilized participants  
29  
30 215 input in determining where to geofence related to smoking<sup>42</sup> or problematic alcohol use<sup>46</sup>. Two  
31  
32 216 studies utilized a mix of fixed and user input. Dorsch et al. utilized user input to geofence  
33  
34 217 locations where foods were consumed or purchased as well as a cloud-based web service to  
35  
36 218 predict when participants entered grocery stores or restaurants. Besoain et al., used a moderated  
37  
38 219 system where participants suggested locations to geofence that were venues for high-risk sexual  
39  
40 220 encounters, but these venues were moderated by the study team and locations could be added or  
41  
42 221 removed.  
43  
44  
45

46  
47 222 *Intervention content delivery: Direct versus Indirect*

48  
49 223 Intervention content was delivered in direct or indirect methods. Five studies (56%) sent  
50  
51 224 participants intervention content directly to their phones based on triggering the geofence  
52  
53 225 boundary. These interventions included informing individuals living in a rural area of a dental  
54  
55  
56  
57  
58  
59  
60

1  
2  
3 226 clinic<sup>41</sup> or sending behavioral messages regarding problematic alcohol use when near a bar<sup>46</sup>,  
4  
5 227 smoking cessation in areas detected as high likelihood of smoking<sup>42</sup>, making low-sodium diet  
6  
7 228 choices in grocery stores, restaurants, or at home, or HIV and STI prevention messages when in  
8  
9 229 venues associated with high-risk sexual activity<sup>22</sup>. The remaining 4 studies were categorized as  
10  
11 230 indirect as they collected data when participants triggered geofence boundaries and in some  
12  
13 231 cases delivered content at a later time from when the fence was triggered.  
14  
15  
16  
17  
18

19 233 *Outcomes of interest*

20  
21 234 There was not a consistent health outcome across the five studies that utilized a direct  
22  
23 235 intervention. Both studies that utilized a randomized control design showed improved outcomes  
24  
25 236 in the group randomized to geofencing. A-CHESS sent context and place-based messages and  
26  
27 237 included multiple other services such as a phone and data plan, access to a virtual counselor, and  
28  
29 238 other interactive features (Table 1).<sup>46</sup> LowSalt4Life contained features including low sodium  
30  
31 239 options and alternatives at grocery stores or restaurants, and the ability to scan product barcodes  
32  
33 240 to find similar low sodium options. Q Sense intervention participants decreased from 60% of  
34  
35 241 pre-quit smoking days to 39% post-quit. UBESafe intervention reported that all participants were  
36  
37 242 able to trigger a hot zone where sexual contacts often took place and received a place-based  
38  
39 243 prevention message.<sup>22</sup> Finally, Wright et al.,<sup>41</sup> used a pre/post design, and found increases in  
40  
41 244 community knowledge about the dental clinic (p=0.045) and increased number of dental visits  
42  
43 245 post intervention.  
44  
45  
46  
47  
48

49 246

50  
51 247 *Indirect intervention outcomes*  
52  
53  
54  
55  
56  
57  
58  
59  
60

1  
2  
3 248 Two studies used the geofence to track time working from medical practitioners or surgical  
4  
5 249 residents (Table 1). Owei et al., found the mean number of working hour violations for surgical  
6  
7 250 residents' post-intervention significantly decreased ( $p=0.04$ ) compared to pre-intervention and  
8  
9 251 compared to the previous year ( $p<0.01$ ).<sup>44</sup> Connor et al., showed a significant correlation of early  
10  
11 252 departures from operating room duties following late departures the previous day ( $p<0.01$ ) and  
12  
13 253 better dispersion of working hours ( $p=0.002$ ) compared to the previous year.<sup>45</sup> Two other studies  
14  
15 254 geofenced major hospitals to detect hospitalization of high priority patients. Nguyen et al., found  
16  
17 255 the geofenced mobile application detected 800 unique participants who triggered a geofence,  
18  
19 256 with a predictive value of true hospitalization between 65-78%.<sup>18</sup> Similarly, from a sample size  
20  
21 257 of 21, 4 of the participants activated the alert system for patients with a ventricular assist device  
22  
23 258 to their on-call care team when they triggered an emergency room geofence.<sup>43</sup>  
24  
25  
26  
27  
28  
29  
30

### 31 260 *Acceptability measures*

32  
33 261 Five studies reported data regarding acceptability of the geofencing mobile application in which  
34  
35 262 all participants were positive regarding the value of the intervention. Participants in two studies  
36  
37 263 with indirect intervention found the application useful and described knowledge of being  
38  
39 264 monitored provided a sense of security<sup>43,44</sup>. Additionally, participants in two studies did not have  
40  
41 265 concerns regarding the continuous geolocation tracking for intervention purpose<sup>42,44</sup>, but did  
42  
43 266 stress the importance of transparency regarding the use of this data<sup>42</sup>. Finally, in one interactive  
44  
45 267 study, participants contributed to the creation and curation of geofenced hot zones as well as the  
46  
47 268 prevention messages received when hot zones were triggered, accounting for 67% of hot zones  
48  
49 269 created and used by the study<sup>22</sup>.  
50  
51  
52  
53  
54  
55  
56  
57  
58  
59  
60



1  
2  
3 271 *Place-based mechanisms*  
4

5 272 Four studies utilized a behavioral mechanism in their geofencing intervention.<sup>22,42,46,47</sup> Four  
6  
7 273 studies utilized a social mechanism which included informational support such as existence of a  
8  
9 274 rural dental clinic<sup>41</sup> and availability of menu grocery store items that were low in sodium.<sup>22,41,46,47</sup>  
10  
11 275 Additionally, participants were able to interact with counselors through the application and  
12  
13 276 review their data concerning visiting high-risk locations for further intervention<sup>46</sup> or sharing  
14  
15 277 context specific messages with other users on the application.<sup>22</sup> Finally, five studies utilized a  
16  
17 278 cognitive mechanism that provided the participant a sense of safety, security, or knowing that  
18  
19 279 their information was captured.<sup>45,46</sup> These included reporting to care teams when the participants  
20  
21 280 were hospitalized<sup>18,43</sup>, capture of time and effort spent working in a clinical environment<sup>44,45</sup>, and  
22  
23 281 participants counselor viewing their location and interacting with their place-based data of  
24  
25 282 proximity and time spent in high-risk areas for binge drinking.<sup>46</sup>  
26  
27  
28  
29  
30  
31  
32

33 284 *Reporting and quality measures*  
34

35 285 From the 16-point checklist, all included studies reported on 6 items (Table 1). Position Health<sup>43</sup>,  
36  
37 286 Stat!<sup>45</sup>, and ResQ<sup>44</sup> studies described how the intervention and data collected integrated into an  
38  
39 287 existing health information system and described some data security procedures. A-CHESS<sup>46</sup> and  
40  
41 288 the Wright et al.,<sup>41</sup> intervention conducted some cost assessment regarding the delivery of the  
42  
43 289 intervention or cost to the participant to utilize the participant. Finally, no study reported on  
44  
45 290 compliance of the intervention or data collection mechanism compliance with national guidelines  
46  
47 291 or federal statutes. We did not assess confidence in the body of evidence or risk of bias.  
48  
49  
50  
51  
52

53  
54 293 **Discussion**  
55  
56  
57  
58  
59  
60

1  
2  
3 294 The purpose of this review was to describe the use of geofencing as an intervention and  
4  
5 295 mechanisms that were targeted to achieve various health outcomes. We identified only 9 studies  
6  
7  
8 296 that fit criteria and as expected, most publications were relatively recent.

9  
10 297 Of the studies included, only one was focused on a sexual and gender minority sample  
11  
12 298 and only one with majority Black, Indigenous People of Color (BIPOC), who experience  
13  
14 299 disparities on a vast number of health outcomes due to social and structural factors such as  
15  
16  
17 300 racism and homophobia.<sup>22</sup> Lack of inclusion of these populations is a significant gap that should  
18  
19 301 be monitored as more studies are conducted. In addition, most studies were in the U.S. (North  
20  
21 302 America) with no studies in developing countries, South America, Africa or Asia, which could  
22  
23  
24 303 represent an important opportunity.

25  
26 304 The included studies described a range of user input of the geofenced locations from  
27  
28 305 researcher only selection to user selection. This characteristic of an intervention merits  
29  
30  
31 306 consideration. User selection of geofenced locations may be prone to bias and recall issues.<sup>48</sup>  
32  
33 307 Researcher selected locations may not consider the variability of their sample's place-based  
34  
35 308 contexts and may under count locations that should be geofenced. The hybrid approach has the  
36  
37  
38 309 potential to address both limitations. Future studies using geofencing technology may warrant  
39  
40 310 comparative studies of the user input approaches and be specific about the rationale for the type  
41  
42 311 of locations that are geofenced and the user input of these so that studies can be comparable and  
43  
44  
45 312 be conducted in non-western contexts.

46  
47 313 Some of the interventions explicitly identified a theoretical model or foundation, and all  
48  
49 314 the studies described targeting at least one of the mechanisms of action from our proposed  
50  
51 315 framework. The studies in which the geofencing intervention targeted the cognitive mechanism  
52  
53  
54 316 were primarily addressing surveillance of the participants and messages to cue cognitions about

1  
2  
3 317 their location. Cueing is a significant component of many effective interventions as they serve as  
4  
5 318 reminders to engage in behaviors of interest.<sup>49-51</sup> Cues can focus on both the protective and risk  
6  
7 319 dimensions of the mechanism. For example, if an individual triggers a geofence of a place they  
8  
9 320 have identified as associated with a sense of control, cues to engage in coping and self-care will  
10  
11 321 be more relevant. Cues in places where stigma is anticipated can also encourage adaptive coping  
12  
13 322 behaviors.

14  
15  
16  
17 323 Studies utilizing the behavioral mechanism described very specific behavioral targets  
18  
19 324 such as buying lower sodium food, avoiding places of alcohol use, condom use and smoking  
20  
21 325 cessation. As building self-efficacy is a well-established theoretical construct necessary for  
22  
23 326 behavioral change<sup>23</sup>, future studies should include opportunities to watch the desired behaviors  
24  
25 327 be role-modeled and practiced to enhance the efficacy of the geofencing intervention.<sup>52</sup>

26  
27  
28 328 Studies that utilized the social mechanism were focused on the provision of both  
29  
30 329 informational and emotional support. One study included a component in which the participants  
31  
32 330 could create messages for other user of the geofencing application. As there are different types of  
33  
34 331 social support (e.g., emotional, appraisal, economic and informational) future studies should be  
35  
36 332 specific and transparent about the types being targeted. With additional geofencing studies, a  
37  
38 333 future review can be conducted using meta-analytic methods to determine the quantitative  
39  
40 334 effectiveness of geofencing interventions in population health research.

#### 41 42 43 335 *Limitations*

44  
45  
46 336 The search strategy was limited to PubMed, CINAHL, EMBASE Web of Science, Cochrane,  
47  
48 337 and PsychINFO and we acknowledge other publications may not have been captured with these.  
49  
50 338 There was heterogeneity in how studies reported intervention development, theoretical  
51  
52 339 frameworks, and feasibility and acceptability of the intervention. This reduced the ability to  
53  
54  
55  
56  
57  
58  
59  
60

1  
2  
3 340 properly assess the extent of behavioral mechanism utilized for the given outcome. Additionally,  
4  
5 341 as geofencing is a new technology, not many peer-reviewed articles have been published and this  
6  
7 342 scoping review chose to exclude conference abstracts.  
8  
9

10 343

11  
12 344 *Conclusions*

13  
14 345 In conclusion, this systematic scoping review indicates that geofencing is an emerging  
15  
16 346 acceptable and feasible intervention that has been applied to various populations and health  
17  
18 347 outcomes.<sup>22</sup> Attention to the mechanisms of actions will enable the field to understand not only  
19  
20 348 whether geofencing is an appropriate and effective intervention but why it works to achieve the  
21  
22 349 outcomes we observe. There is a need for future research that includes sexual and gender  
23  
24 350 minority and BIPOC populations and populations from non-Western contexts to achieve the  
25  
26 351 Health People Framework objectives given the persistent findings that BIPOC and SGM  
27  
28 352 populations. These studies could address those health outcomes where disparities are stark such  
29  
30 353 as HIV/AIDS, cardiovascular, diabetes, COVID-related and monkeypox. Finally, future research  
31  
32 354 can reveal place-based contexts that have not been considered which can inform resource  
33  
34  
35  
36  
37 355 allocation and targets for health-promoting policies.  
38  
39  
40  
41  
42  
43  
44  
45  
46  
47  
48  
49  
50  
51  
52  
53  
54  
55  
56  
57  
58  
59  
60

1  
2  
3  
4  
5  
6  
7  
8  
9  
10  
11  
12  
13  
14  
15  
16  
17  
18  
19  
20  
21  
22  
23  
24  
25  
26  
27  
28  
29  
30  
31  
32  
33  
34  
35  
36  
37  
38  
39  
40  
41  
42  
43  
44  
45  
46  
47

**Table 1. Components of mobile health evidence reporting and assessment.**

|                                                            | Wright et al., 2021 | Owei et al., 2021 | Gustafson et al., 2014 | Nguyen et al., 2017 | Naughton et al., 2016 | Dorsch et al., 2020 | DeFilippis et al., 2017 | Connor & Herzig, 2016 | Besoain et al., 2020 |
|------------------------------------------------------------|---------------------|-------------------|------------------------|---------------------|-----------------------|---------------------|-------------------------|-----------------------|----------------------|
| Infrastructure                                             |                     |                   |                        |                     |                       |                     |                         |                       |                      |
| Technology platform                                        |                     |                   |                        |                     |                       |                     |                         |                       |                      |
| Interpretability/Health information systems context        |                     |                   |                        |                     |                       |                     |                         |                       |                      |
| Intervention delivery                                      |                     |                   |                        |                     |                       |                     |                         |                       |                      |
| Intervention content                                       |                     |                   |                        |                     |                       |                     |                         |                       |                      |
| Usability/content testing                                  |                     |                   |                        |                     |                       |                     |                         |                       |                      |
| User feedback                                              |                     |                   |                        |                     |                       |                     |                         |                       |                      |
| Access of individual participants                          |                     |                   |                        |                     |                       |                     |                         |                       |                      |
| Cost assessment                                            |                     |                   |                        |                     |                       |                     |                         |                       |                      |
| Adoption inputs/program entry                              |                     |                   |                        |                     |                       |                     |                         |                       |                      |
| Limitations for delivery at scale                          |                     |                   |                        |                     |                       |                     |                         |                       |                      |
| Contextual adaptability                                    |                     |                   |                        |                     |                       |                     |                         |                       |                      |
| Replicability                                              |                     |                   |                        |                     |                       |                     |                         |                       |                      |
| Data security                                              |                     |                   |                        |                     |                       |                     |                         |                       |                      |
| Compliance with national guidelines or regulatory statutes |                     |                   |                        |                     |                       |                     |                         |                       |                      |
| Fidelity of the intervention                               |                     |                   |                        |                     |                       |                     |                         |                       |                      |

### **Contributorship statement**

All authors conceptualized and contributed to writing this manuscript. Co-first authors Tobin and Heidari led the data abstraction and analysis.

### **Competing interests**

Karin E. Tobin, Omeid Heidari, Connor Volpi, Shereen Sodder and Duston Duncan declare that they have no conflict of interest.

### **Funding**

This work was supported by a grant from the National Institute of Mental Health R34MH118178

### **Data sharing statement**

We will consider requests for access to methods or the data used in this study. Template data collection forms; data extracted from included studies; data used for all analyses; analytic code; any other materials used in the review are available upon request to the lead author

### **Human and Animal Rights and Informed Consent**

This article does not contain any studies with human or animal studies performed by any of the authors.

## References:

1. Larson NI, Story MT, Nelson MC. Neighborhood environments: disparities in access to healthy foods in the US. *American journal of preventive medicine*. 2009;36(1):74-81. e10.
2. Lazar M, Davenport L. Barriers to health care access for low income families: a review of literature. *Journal of community health nursing*. 2018;35(1):28-37.
3. Kalichman SC, Kalichman MO. HIV-related stress and life chaos mediate the association between poverty and medication adherence among people living with HIV/AIDS. *Journal of clinical psychology in medical settings*. 2016;23(4):420-430.
4. Taylor SE, Repetti RL, Seeman T. Health psychology: what is an unhealthy environment and how does it get under the skin? *Annual review of psychology*. 1997;48
5. Earnshaw VA, Bogart LM, Dovidio JF, Williams DR. Stigma and racial/ethnic HIV disparities: moving toward resilience. 2015;
6. Lutete P, Matthews DW, Sabounchi NS, et al. Intersectional Stigma and Prevention Among Gay, Bisexual, and Same Gender-Loving Men in New York City, 2020: System Dynamics Models. *American journal of public health*. 2022;112(S4):S444-S451.
7. Quinn K, Dickson-Gomez J, Zarwell M, Pearson B, Lewis M. "A gay man and a doctor are just like, a recipe for destruction": How racism and homonegativity in healthcare settings influence PrEP uptake among young Black MSM. *AIDS and Behavior*. 2019;23(7):1951-1963.
8. Arcaya MC, Tucker-Seeley RD, Kim R, Schnake-Mahl A, So M, Subramanian S. Research on neighborhood effects on health in the United States: a systematic review of study characteristics. *Social Science & Medicine*. 2016;168:16-29.
9. Duncan DT, Kawachi I. *Neighborhoods and health*. vol 10. Oxford University Press New York; 2018.
10. Rifkin SB. Examining the links between community participation and health outcomes: a review of the literature. *Health policy and planning*. 2014;29(suppl\_2):ii98-ii106.
11. Gesler WM. Therapeutic landscapes: medical issues in light of the new cultural geography. *Social science & medicine*. 1992;34(7):735-746.
12. Keene DE, Padilla MB. Spatial stigma and health inequality. *Critical public health*. 2014;24(4):392-404.
13. Duncan DT, Kawachi I, Subramanian S, Aldstadt J, Melly SJ, Williams DR. Examination of how neighborhood definition influences measurements of youths' access to tobacco retailers: a methodological note on spatial misclassification. *American journal of epidemiology*. 2014;179(3):373-381.
14. Palmer JR, Espenshade TJ, Bartumeus F, Chung CY, Ozgencil NE, Li K. New approaches to human mobility: Using mobile phones for demographic research. *Demography*. 2013;50(3):1105-1128.
15. Heron KE, Smyth JM. Ecological momentary interventions: incorporating mobile technology into psychosocial and health behaviour treatments. *British journal of health psychology*. 2010;15(1):1-39.
16. Wang L, Miller LC. Just-in-the-moment adaptive interventions (JITAI): A meta-analytical review. *Health Communication*. 2020;35(12):1531-1544.
17. Nahum-Shani I, Smith SN, Spring BJ, et al. Just-in-time adaptive interventions (JITAI) in mobile health: key components and design principles for ongoing health behavior support. *Annals of Behavioral Medicine*. 2018;52(6):446-462.

18. Nguyen KT, Olgin JE, Pletcher MJ, et al. Smartphone-based geofencing to ascertain hospitalizations. *Circulation: Cardiovascular Quality and Outcomes*. 2017;10(3):e003326.
19. Carpenter SM, Menictas M, Nahum-Shani I, Wetter DW, Murphy SA. Developments in mobile health just-in-time adaptive interventions for addiction science. *Current addiction reports*. 2020;7(3):280-290.
20. Naughton F. Delivering “Just-In-Time” smoking cessation support via mobile phones: current knowledge and future directions. *Nicotine & Tobacco Research*. 2017;19(3):379-383.
21. Thomas JG, Bond DS. Review of innovations in digital health technology to promote weight control. *Current diabetes reports*. 2014;14(5):1-10.
22. Besoain F, Perez-Navarro A, Aviñó CJ, Caylà JA, Barriga NA, de Olalla PG. Prevention of HIV and other sexually transmitted infections by geofencing and contextualized messages with a gamified app, UBESAFE: design and creation study. *JMIR mHealth and uHealth*. 2020;8(3):e14568.
23. Bandura A. Social cognitive theory: An agentic perspective. *Asian journal of social psychology*. 1999;2(1):21-41.
24. Turan B, Hatcher AM, Weiser SD, Johnson MO, Rice WS, Turan JM. Framing mechanisms linking HIV-related stigma, adherence to treatment, and health outcomes. *American journal of public health*. 2017;107(6):863-869.
25. Macintyre S, Ellaway A, Cummins S. Place effects on health: how can we conceptualise, operationalise and measure them? *Social science & medicine*. 2002;55(1):125-139.
26. Khawcharoenporn T, Mongkolkaewsub S, Naijitra C, Khonphiern W, Apisarnthanarak A, Phanuphak N. HIV risk, risk perception and uptake of HIV testing and counseling among youth men who have sex with men attending a gay sauna. *AIDS research and therapy*. 2019;16(1):1-11.
27. Machowska A, Bamboria BL, Bercan C, Sharma M. Impact of ‘HIV-related stigma-reduction workshops’ on knowledge and attitude of healthcare providers and students in Central India: a pre-test and post-test intervention study. *BMJ open*. 2020;10(4):e033612.
28. Mi T, Li X, Zhou G, Qiao S, Shen Z, Zhou Y. HIV disclosure to family members and medication adherence: role of social support and self-efficacy. *AIDS and Behavior*. 2020;24(1):45-54.
29. SeyedAlinaghi S, MohsseniPour M, Aghaei E, Zarani F, Fathabadi J, Mohammadifrouzeh M. The Relationships Between Early Maladaptive Schemas, Quality of Life and Self-care Behaviors in a Sample of Persons Living with HIV: The Potential Mediating Role of Cognitive Emotion Regulation Strategies. *The Open AIDS Journal*. 2020;14(1)
30. Steptoe A, Jackson SE. The life skills of older Americans: association with economic, psychological, social, and health outcomes. *Scientific Reports*. 2018;8(1):1-10.
31. Yigit I, Bayramoglu Y, Weiser SD, et al. Changes in internalized stigma and HIV health outcomes in individuals new to HIV care: The mediating roles of depression and treatment self-efficacy. *AIDS Patient Care and STDs*. 2020;34(11):491-497.
32. Gonzalez A, Barinas J, O’Cleirigh C. Substance use: impact on adherence and HIV medical treatment. *Current HIV/AIDS Reports*. 2011;8(4):223-234.
33. Logie CH, Williams CC, Wang Y, et al. Adapting stigma mechanism frameworks to explore complex pathways between intersectional stigma and HIV-related health outcomes among women living with HIV in Canada. *Soc Sci Med*. 2019;232:129-38.



34. Safren SA, Blashill AJ, Lee JS, et al. Condom-use self-efficacy as a mediator between syndemics and condomless sex in men who have sex with men (MSM). *Health psychology*. 2018;37(9):820.
35. Weinstein ER, Harkness A, Ironson G, Shrader C-H, Duncan DT, Safren SA. Life instability associated with lower ART adherence and other poor HIV-related care outcomes in older adults with HIV. *International journal of behavioral medicine*. 2022:1-11.
36. Bekele T, Rourke SB, Tucker R, et al. Direct and indirect effects of perceived social support on health-related quality of life in persons living with HIV/AIDS. *AIDS care*. 2013;25(3):337-346.
37. Koegler E, Kennedy CE. A scoping review of the associations between mental health and factors related to HIV acquisition and disease progression in conflict-affected populations. *Conflict and health*. 2018;12(1):1-22.
38. Vaughan E, Power M, Sixsmith J. Experiences of stigma in healthcare settings by people living with HIV in Ireland: a qualitative study. *AIDS care*. 2020;32(9):1162-1167.
39. Tricco AC, Lillie E, Zarin W, et al. PRISMA extension for scoping reviews (PRISMA-ScR): checklist and explanation. *Annals of internal medicine*. 2018;169(7):467-473.
40. Agarwal S, LeFevre AE, Lee J, et al. Guidelines for reporting of health interventions using mobile phones: mobile health (mHealth) evidence reporting and assessment (mERA) checklist. *bmj*. 2016;352
41. Wright WG, Rafferty AP, Winterbauer N, Locklear K, Tucker-McLaughlin M. Geofencing: Mobile Technology as a Health Promotion Tool to Raise Awareness of a Dental Clinic in Rural North Carolina. *The Journal of Rural Health*. 2021;37(3):667-674.
42. Naughton F, Hopewell S, Lathia N, et al. A context-sensing mobile phone app (Q sense) for smoking cessation: a mixed-methods study. *JMIR mHealth and uHealth*. 2016;4(3):e5787.
43. DeFilippis EM, Safavi K, Reyes J, Coakley L, Hickey M, Givertz MM. Mobile Geolocation Technology to Improve Multidisciplinary Care of Patients with Ventricular Assist Devices: A Feasibility Study. *Journal of Cardiac Failure*. 2017;23(8):S84.
44. Owei L, Luks VL, Brooks KD, Kelz RR, Berns JS, Aarons CB. Smart-phone Based Geofencing: A Novel Approach to Monitoring Clinical Work Hours in Surgery Residency. *Journal of Surgical Education*. 2021;78(6):e210-e217.
45. Connor CW, Herzog M. Monitoring the location of staff via mobile devices in a large multifacility practice group. *A & A case reports*. 2016;6(10):320-328.
46. Gustafson DH, McTavish FM, Chih M-Y, et al. A smartphone application to support recovery from alcoholism: a randomized clinical trial. *JAMA psychiatry*. 2014;71(5):566-572.
47. Dorsch MP, Cornellier ML, Poggi AD, et al. Effects of a novel contextual just-in-time mobile app intervention (LowSalt4Life) on sodium intake in adults with hypertension: pilot randomized controlled trial. *JMIR mHealth and uHealth*. 2020;8(8):e16696.
48. Wray TB, Pérez AE, Celio MA, Carr DJ, Adia AC, Monti PM. Exploring the Use of Smartphone Geofencing to Study Characteristics of Alcohol Drinking Locations in High-Risk Gay and Bisexual Men. *Alcoholism: clinical and experimental research*. 2019;43(5):900-906.
49. Latkin CA, Hua W, Tobin K. Social network correlates of self-reported non-fatal overdose. *Drug and Alcohol Dependence*. 2004;73(1):61-67.
50. Tobin KE, Davey MA, Latkin CA. Calling emergency medical services during drug overdose: an examination of individual, social and setting correlates. *Addiction*. 2005;100(3):397-404.

- 1  
2  
3 51. Tobin KE, Latkin CA. Social networks of HIV positive gay men: their role and  
4 importance in HIV prevention. *Understanding Prevention for HIV Positive Gay Men*. Springer;  
5 2017:349-366.  
6  
7 52. Tobin KE, Heidari O, Winiker A, et al. Peer Approaches to Improve HIV Care Cascade  
8 Outcomes: a Scoping Review Focused on Peer Behavioral Mechanisms. *Current HIV/AIDS*  
9 *Reports*. 2022:1-14.  
10  
11  
12  
13  
14  
15  
16  
17  
18  
19  
20  
21  
22  
23  
24  
25  
26  
27  
28  
29  
30  
31  
32  
33  
34  
35  
36  
37  
38  
39  
40  
41  
42  
43  
44  
45  
46  
47  
48  
49  
50  
51  
52  
53  
54  
55  
56  
57  
58  
59  
60

For peer review only

Figure 1. Types of mechanisms of action, protective and risk factors as well as spatial scales in geofencing interventions in population health research.

| <b>Mechanisms of Action</b> | <b>Protective</b>                 | <b>Risk</b>                                           | <b>Spatial Scales</b>                         |
|-----------------------------|-----------------------------------|-------------------------------------------------------|-----------------------------------------------|
| Cognitive                   | Sense of control<br>Self-efficacy | Internalized & anticipated stigma<br>Risk perceptions | Room<br>Home<br>Block<br>Neighborhood<br>City |
| Behavioral                  | Adaptive Coping<br>Self-care      | Substance use<br>Non-adherence to medication          | County<br>State<br>Region                     |
| Social                      | Instrumental & Emotional support  | Enacted stigma<br>Conflict                            | Nation<br>Globe                               |

**Appendix 1.** Detailed search strategy across n=6 databases**PubMed**

| Concept             | Search Terms                                                                                                                                                                                                                                                                             |
|---------------------|------------------------------------------------------------------------------------------------------------------------------------------------------------------------------------------------------------------------------------------------------------------------------------------|
| Mobile applications | ("Smartphone"[Mesh]) OR "Mobile Applications"[Mesh] OR smartphon* [tiab] OR "mobile application*" [tw] OR "mobile app" [tw] OR "mobile apps" [tw] OR "mobile phon*" [tw]                                                                                                                 |
| Geofencing          | "Geographic Information Systems"[Mesh] OR "Geographic Information System" [tw] OR "Geographical Information System" [tw] OR "Geographical Information Systems" [tw] OR "Georeferencing" [tw] OR "Global Positioning System" [tw] OR "Global Positioning Systems" [tw] OR "Geofenc*" [tw] |

**Embase**

| Concept             | Search Terms                                                                                                                                                                                                                                                                                                                                         |
|---------------------|------------------------------------------------------------------------------------------------------------------------------------------------------------------------------------------------------------------------------------------------------------------------------------------------------------------------------------------------------|
| Mobile applications | 'mobile phone'/exp OR 'wireless communication'/exp OR 'mobile application'/exp OR smartphon*:ti,ab,kw OR 'mobile application*':ti,ab,kw OR 'mobile app':ti,ab,kw OR 'mobile apps':ti,ab,kw OR 'mobile phon*':ti,ab,kw                                                                                                                                |
| Geofencing          | 'geographic information system'/exp OR 'global positioning system'/exp OR 'geographic information system':ti,ab,kw OR 'geographical information system':ti,ab,kw OR 'geographical information systems':ti,ab,kw OR 'georeferencing':ti,ab,kw OR 'global positioning system':ti,ab,kw OR 'global positioning systems':ti,ab,kw OR 'geofenc*':ti,ab,kw |

**CINAHL**

| Concept             | Search Terms                                                                                                                                                                                                                                        |
|---------------------|-----------------------------------------------------------------------------------------------------------------------------------------------------------------------------------------------------------------------------------------------------|
| Mobile applications | (MH "Smartphone") OR (MH "Cellular Phone+") OR (MH "Text Messaging+") OR (MH "Mobile Applications") OR smartphon* OR "mobile application*" OR "mobile app" OR "mobile apps" OR "mobile phon"                                                        |
| Geofencing          | (MH "Geographic Information Systems+") OR "Geographic Information System" OR "Geographical Information System" OR "Geographical Information Systems" OR "Georeferencing" OR "Global Positioning System" OR "Global Positioning Systems" OR Geofenc* |

**Cochrane**

| Concept             | Search Terms                                                                                                                                                                                      |
|---------------------|---------------------------------------------------------------------------------------------------------------------------------------------------------------------------------------------------|
| Mobile applications | ([mh Smartphone]) OR [mh "Mobile Applications"] OR smartphon*:ti,ab OR ("mobile" NEXT application*):ti,ab,kw OR "mobile app":ti,ab,kw OR "mobile apps":ti,ab,kw OR ("mobile" NEXT phon*):ti,ab,kw |

|            |                                                                                                                                                                                                                                                                                                                 |
|------------|-----------------------------------------------------------------------------------------------------------------------------------------------------------------------------------------------------------------------------------------------------------------------------------------------------------------|
| Geofencing | [mh "Geographic Information Systems"] OR "Geographic Information System":ti,ab,kw OR "Geographical Information System":ti,ab,kw OR "Geographical Information Systems":ti,ab,kw OR Georeferencing:ti,ab,kw OR "Global Positioning System":ti,ab,kw OR "Global Positioning Systems":ti,ab,kw OR Geofenc*:ti,ab,kw |
|------------|-----------------------------------------------------------------------------------------------------------------------------------------------------------------------------------------------------------------------------------------------------------------------------------------------------------------|

### Web of Science

| Concept             | Search Terms                                                                                                                                                                                                                                      |
|---------------------|---------------------------------------------------------------------------------------------------------------------------------------------------------------------------------------------------------------------------------------------------|
| Mobile applications | (ALL=((Smartphone) OR "Mobile Applications" OR smartphon* OR "mobile application*" OR "mobile app" OR "mobile apps" OR "mobile phon*"))                                                                                                           |
| Geofencing          | ALL=("Geographic Information Systems" OR "Geographic Information System" OR "Geographical Information System" OR "Geographical Information Systems" OR Georeferencing OR "Global Positioning System" OR "Global Positioning Systems" OR Geofenc*) |

### APA PsychINFO

| Concept             | Search Terms                                                                                                                                                                                                                             |
|---------------------|------------------------------------------------------------------------------------------------------------------------------------------------------------------------------------------------------------------------------------------|
| Mobile applications | DE "Smartphones" OR DE "Mobile Applications" OR DE "Smartphone Use" OR DE "Text Messaging" OR DE "Wireless Technologies" OR DE "Mobile Phones" OR smartphon* OR "mobile application*" OR "mobile app" OR "mobile apps" OR "mobile phon*" |
| Geofencing          | "Geographic Information System" OR "Geographical Information System" OR "Geographical Information Systems" OR "Georeferencing" OR "Global Positioning System" OR "Global Positioning Systems" OR Geofenc*                                |

Figure 1. PRISMA diagram of selected studies

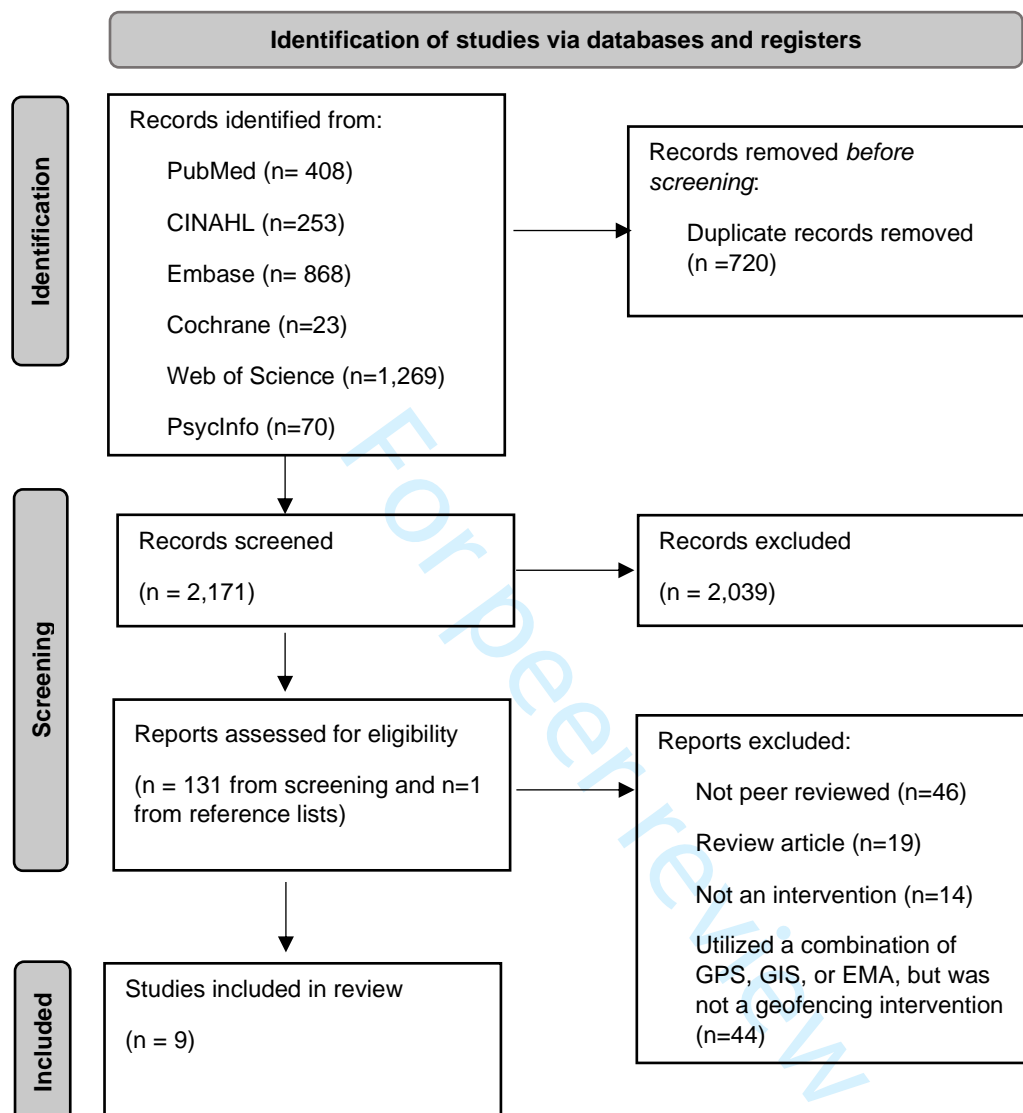

1  
2  
3  
4  
5  
6  
7  
8  
9  
10  
11  
12  
13  
14  
15  
16  
17  
18  
19  
20  
21  
22  
23  
24  
25  
26  
27  
28  
29  
30  
31  
32  
33  
34  
35  
36  
37  
38  
39  
40  
41  
42  
43  
44  
45  
46  
47

| Table 1. Details of nine studies that met inclusion criteria for the scoping review |                                                                                                                                                                                                                                                                                                                                                                                                                                                                                                                                                                                                                                                                                                 |                                                                                                                                                                                                                                                                                                       |                                                                                                                                                                                                                                                                                                                              |                                                                                                                                                                                                                    |
|-------------------------------------------------------------------------------------|-------------------------------------------------------------------------------------------------------------------------------------------------------------------------------------------------------------------------------------------------------------------------------------------------------------------------------------------------------------------------------------------------------------------------------------------------------------------------------------------------------------------------------------------------------------------------------------------------------------------------------------------------------------------------------------------------|-------------------------------------------------------------------------------------------------------------------------------------------------------------------------------------------------------------------------------------------------------------------------------------------------------|------------------------------------------------------------------------------------------------------------------------------------------------------------------------------------------------------------------------------------------------------------------------------------------------------------------------------|--------------------------------------------------------------------------------------------------------------------------------------------------------------------------------------------------------------------|
| Geofenced intervention name/citation                                                | Study characteristics                                                                                                                                                                                                                                                                                                                                                                                                                                                                                                                                                                                                                                                                           | Development of geofence                                                                                                                                                                                                                                                                               | Results                                                                                                                                                                                                                                                                                                                      | Theory and framework                                                                                                                                                                                               |
| Wright et al., 2021<br><br>Vendor not cited                                         | <p><i>Study purpose:</i> Increase awareness and use of dental services in a rural clinic</p> <p><i>Study design:</i> Pre and post intervention community and outcome assessments</p> <p><i>Target population:</i> Residents of a rural zip code surrounding a dental clinic</p> <p><i>Sample size:</i> 516,073 impressions delivered to individuals crossing the geofence</p> <p><i>Duration of follow-up:</i> Impressions were sent over a 60-day period</p> <p><i>Outcome of interest:</i> Number of impressions displayed to a user, clicks on the banner, click-through rates on the dental website from the banner, and pre/post intervention community knowledge of the dental clinic</p> | <p><i>User input:</i> None</p> <p><i>Mechanism of delivery:</i> Any individual with a smartphone physically located within the boundaries of three zip codes near the dental clinic received a geofence message advertising the dental clinic with webpage information for additional information</p> | <p>Over 60 days, 516,073 impressions were delivered, with 475 individuals clicks on the banner to get website information, and a click through rate of 0.09%.</p> <p>Increases were seen in community knowledge about the clinic (p=0.045) and dental visits by respondent or a family member (p=0.04) post intervention</p> | <p><i>Theoretical framework:</i> Anderson Model of Health Services Use</p> <p><i>Behavioral</i></p> <p><i>Social:</i> Informational support of an existing service that is place-based</p> <p><i>Cognitive</i></p> |
| Owei et al., 2021<br><br>ResQ                                                       | <p><i>Study purpose:</i> Assess the impact of the ResQ geofencing app on submission rates for duty hours and number of violations reported</p> <p><i>Study design:</i> Mixed methods feasibility and acceptability of the ResQ app.</p> <p><i>Target population:</i> Residents from the General Surgery Residency Program</p>                                                                                                                                                                                                                                                                                                                                                                   | <p><i>User input:</i> None</p> <p><i>Mechanism of delivery:</i> Geofences were placed around clinical sites where residents worked. The ResQ application was installed on resident’s work phones and</p>                                                                                              | <p>The mean number of violations decreased significantly (p=0.04) and work hour submissions did not differ with the intervention (p=0.42). Compared to the previous year, reported violations significantly decreased (p&lt;0.01).</p>                                                                                       | <p><i>Theoretical framework:</i> None listed</p> <p><i>Behavioral</i></p> <p><i>Social</i></p> <p><i>Cognitive:</i> Sense of safety in capture</p>                                                                 |

|                                              |                                                                                                                                                                                                                                                                                                                                                                                                                                                                                           |                                                                                                                                                                                                                                                        |                                                                                                                                                                                                                                                                |                                                                                                                                                                                                                                                                                        |
|----------------------------------------------|-------------------------------------------------------------------------------------------------------------------------------------------------------------------------------------------------------------------------------------------------------------------------------------------------------------------------------------------------------------------------------------------------------------------------------------------------------------------------------------------|--------------------------------------------------------------------------------------------------------------------------------------------------------------------------------------------------------------------------------------------------------|----------------------------------------------------------------------------------------------------------------------------------------------------------------------------------------------------------------------------------------------------------------|----------------------------------------------------------------------------------------------------------------------------------------------------------------------------------------------------------------------------------------------------------------------------------------|
|                                              | <p><i>Sample size:</i> 23</p> <p><i>Duration of follow-up:</i> 60 days</p> <p><i>Outcome of interest:</i> Comparison of reported and recorded work hours submitted and work hour violations (80 hours per week and continuous hours worked). Additionally, 13 participants participated in semi-structured interviews to understand acceptability and feasibility of ResQ.</p>                                                                                                            | <p>recorded work hours based on entering and exiting the geofence.</p>                                                                                                                                                                                 | <p>Participants found the application useful for recording and reporting clinical hours and eased administrative burden.</p>                                                                                                                                   | <p>and reporting of clinical hours</p>                                                                                                                                                                                                                                                 |
| <p>Gustafson et al., 2014</p> <p>A-CHESS</p> | <p><i>Study purpose:</i> Determine if a smartphone application to support recovery from alcohol use disorders reduced risky drinking days.</p> <p><i>Study design:</i> Unmasked randomized clinical trial</p> <p><i>Target population:</i> People with diagnosed alcohol dependence discharged from residential treatment</p> <p><i>Sample size:</i> 349</p> <p><i>Duration of follow-up:</i> 8 months</p> <p><i>Outcome of interest:</i> Risky drinking days in the previous 30 days</p> | <p><i>User input:</i> High-risk locations were identified by participants</p> <p><i>Mechanism of delivery:</i> Study team geofenced user identified high-risk locations and sent alerts to the user's smartphone asking if they wanted to be there</p> | <p>Along with the geofenced intervention, A-CHESS was a mobile application that provided monitoring, information, communication, and support services from counselors. Overall the A-CHESS group reported fewer risky drinking days at follow-up (p=0.003)</p> | <p><i>Theoretical framework:</i> Self-determination theory</p> <p><i>Behavioral:</i> Warning messages sent in risky areas</p> <p><i>Social:</i> Informational support with counselors</p> <p><i>Cognitive:</i> Passive and real-time capture of information shared with counselors</p> |
| <p>Nguyen et al., 2017</p> <p>Ginger.io</p>  | <p><i>Study purpose:</i> Evaluate the use of smartphone-based geofencing for tracking hospitalizations</p>                                                                                                                                                                                                                                                                                                                                                                                | <p><i>User input:</i> None</p> <p><i>Mechanism of delivery:</i> The app was programmed with all</p>                                                                                                                                                    | <p>Remote- The application detected 800 unique participants in a geofenced location with a positive predictive value between 65-</p>                                                                                                                           | <p><i>Theoretical framework:</i> None listed</p>                                                                                                                                                                                                                                       |



1  
2  
3  
4  
5  
6  
7  
8  
9  
10  
11  
12  
13  
14  
15  
16  
17  
18  
19  
20  
21  
22  
23  
24  
25  
26  
27  
28  
29  
30  
31  
32  
33  
34  
35  
36  
37  
38  
39  
40  
41  
42  
43  
44  
45  
46  
47

|                                             |                                                                                                                                                                                                                                                                                                                                                                                                                                                                                                                                                                                                   |                                                                                                                                                                                                                                                                                                              |                                                                                                                                                                                                                                                                                                                                                                                      |                                                                                                                                                                                                                      |
|---------------------------------------------|---------------------------------------------------------------------------------------------------------------------------------------------------------------------------------------------------------------------------------------------------------------------------------------------------------------------------------------------------------------------------------------------------------------------------------------------------------------------------------------------------------------------------------------------------------------------------------------------------|--------------------------------------------------------------------------------------------------------------------------------------------------------------------------------------------------------------------------------------------------------------------------------------------------------------|--------------------------------------------------------------------------------------------------------------------------------------------------------------------------------------------------------------------------------------------------------------------------------------------------------------------------------------------------------------------------------------|----------------------------------------------------------------------------------------------------------------------------------------------------------------------------------------------------------------------|
|                                             | <p><i>Study design:</i> Remote and in-person arm validation of a mobile application that detected hospitalizations and length of hospitalization</p> <p><i>Target population:</i> Remote- participants from the Health eHeart study with a smartphone<br/>In-person- Patients scheduled for electrophysiology and cardiac catheterization procedures.</p> <p><i>Sample size:</i> Remote- 3,443; In person- 22</p> <p><i>Duration of follow-up:</i> Remote- mean of 260 days; In person- Duration of their scheduled procedure</p> <p><i>Outcome of interest:</i> Detection of hospitalization</p> | <p>U.S. hospitals geofenced. A notification was sent to within 1 hour of leaving the hospital vicinity asking participants to confirm if they received medical care</p>                                                                                                                                      | <p>78% based on how hospitalization was confirmed. Most common error in detection was the participant was a medical center employee.</p> <p>In person- Visits were detected in 17/22 with confirmed hospitalization. Mean visit duration was not correlated with actual hospital length of stay.</p>                                                                                 | <p><i>Behavioral</i></p> <p><i>Social</i></p> <p><i>Cognitive:</i> Sense of safety in provider knowing your hospitalization status</p>                                                                               |
| <p>Naughton et al., 2016</p> <p>Q Sense</p> | <p><i>Study purpose:</i> Feasibility and acceptability of a mobile application using geofencing to deliver tailored place-based intervention messages</p> <p><i>Study design:</i> Explanatory sequential mixed methods</p> <p><i>Target population:</i> Tobacco smokers willing to set a quit date within 1 month</p> <p><i>Sample size:</i> 15 in quantitative arm and 13 qualitative interviews</p>                                                                                                                                                                                             | <p><i>User input:</i> Geofences based on user habits and reports of smoking locations</p> <p><i>Mechanism of delivery:</i> If a smoker reported smoking in the same proximity, the device created a geofence around that area with a radius of 100m. When a user entered the geofence for greater than 5</p> | <p>User engagement with the application varied from 60% of days pre-quit and 39% post-quit (52% excluding outliers).</p> <p>Geolocation was collected on 97% of smoking reports with high accuracy. A mean of 1.5 geofences were created per participant with 87% having at least one. 5/9 participants eligible to receive a geofenced triggered message received at least one.</p> | <p><i>Theoretical framework:</i> Learning theory and taxonomy of smoking behavior change</p> <p><i>Behavioral:</i> Coping and resilience regarding smoking triggers</p> <p><i>Social</i></p> <p><i>Cognitive</i></p> |

|                                                       |                                                                                                                                                                                                                                                                                                                                                                                                                                                                                                                                          |                                                                                                                                                                                                                                                                                                                                                                           |                                                                                                                                                                                                                                                                                                                                                        |                                                                                                                                                                                                                                                                                                                                        |
|-------------------------------------------------------|------------------------------------------------------------------------------------------------------------------------------------------------------------------------------------------------------------------------------------------------------------------------------------------------------------------------------------------------------------------------------------------------------------------------------------------------------------------------------------------------------------------------------------------|---------------------------------------------------------------------------------------------------------------------------------------------------------------------------------------------------------------------------------------------------------------------------------------------------------------------------------------------------------------------------|--------------------------------------------------------------------------------------------------------------------------------------------------------------------------------------------------------------------------------------------------------------------------------------------------------------------------------------------------------|----------------------------------------------------------------------------------------------------------------------------------------------------------------------------------------------------------------------------------------------------------------------------------------------------------------------------------------|
|                                                       | <p><i>Duration of follow-up:</i> Pre-quit period (up to 1 month) and 2 weeks post-quit date</p> <p><i>Outcome of interest:</i> 1) User engagement with app; 2) Assess app's location-sensing accuracy; 3) Feasibility of geofence mechanism; 4) Limitations of everyday use of app</p>                                                                                                                                                                                                                                                   | <p>minutes a location-tailored support message was triggered</p>                                                                                                                                                                                                                                                                                                          | <p>Environmental constraints and forgetfulness were common reasons for forgetting to engage with app. Participants were positive about the value of the geofenced support and had no privacy concerns.</p>                                                                                                                                             |                                                                                                                                                                                                                                                                                                                                        |
| <p>Dorsch et al., 2020</p> <p>LowSalt4Life</p>        | <p><i>Study purpose:</i> Effectiveness of the LowSalt4Life mobile app on maintaining a low sodium diet and controlling blood pressure</p> <p><i>Study design:</i> Unblinded randomized control trial</p> <p><i>Target population:</i> Adults diagnosed with hypertension and taking antihypertensive medication</p> <p><i>Sample size:</i> 50 randomized</p> <p><i>Duration of follow-up:</i> 8 weeks</p> <p><i>Outcome of interest:</i> Changes in 24-hour dietary recall and sodium intake, urine sodium excretion, blood pressure</p> | <p><i>User input:</i> Mixed. Geofences were created based on user input as well as from a predictive service when a participant entered a grocery store, restaurant, or home.</p> <p><i>Mechanism of delivery:</i> Contextual adaptive messages were sent to participant's phones when entering a geofence, with messages linked to content in the mobile application</p> | <p>There was a significant decrease in sodium excretion (<math>p=0.03</math>) and decrease in sodium intake via 24 hour dietary recall (<math>p=0.01</math>) and in the App group vs no App groups. Blood pressure decreased by 1.7 mmHg in the App group compared to 0.7 in the no App, but the change was not significant (<math>p=0.12</math>).</p> | <p><i>Theoretical framework:</i> Theory of Planned Behavior</p> <p><i>Behavioral:</i> Dietary messages sent when participant is in areas where they would purchase/consume food</p> <p><i>Social:</i> Informational support regarding which products and food choices had lower sodium in context of place</p> <p><i>Cognitive</i></p> |
| <p>DeFilippis et al., 2017</p> <p>Position Health</p> | <p><i>Study purpose:</i> Determine the feasibility of patients with ventricular assist devices care engagement with and feasibility of a geofencing notification system.</p>                                                                                                                                                                                                                                                                                                                                                             | <p><i>User input:</i> None</p> <p><i>Mechanism of delivery:</i> Geofences were drawn around</p>                                                                                                                                                                                                                                                                           | <p>The system was active on 4 occasions, each of which the participant confirmed they were at or near the hospital but were not seeking care. 1</p>                                                                                                                                                                                                    | <p><i>Theoretical framework:</i> None listed</p> <p><i>Behavioral</i></p>                                                                                                                                                                                                                                                              |

1  
2  
3  
4  
5  
6  
7  
8  
9  
10  
11  
12  
13  
14  
15  
16  
17  
18  
19  
20  
21  
22  
23  
24  
25  
26  
27  
28  
29  
30  
31  
32  
33  
34  
35  
36  
37  
38  
39  
40  
41  
42  
43  
44  
45  
46  
47

|                                               |                                                                                                                                                                                                                                                                                                                                                                                                      |                                                                                                                                                                                                                                                                                                                                                                                                                                       |                                                                                                                                                                                                                                                                                           |                                                                                                                                                                                             |
|-----------------------------------------------|------------------------------------------------------------------------------------------------------------------------------------------------------------------------------------------------------------------------------------------------------------------------------------------------------------------------------------------------------------------------------------------------------|---------------------------------------------------------------------------------------------------------------------------------------------------------------------------------------------------------------------------------------------------------------------------------------------------------------------------------------------------------------------------------------------------------------------------------------|-------------------------------------------------------------------------------------------------------------------------------------------------------------------------------------------------------------------------------------------------------------------------------------------|---------------------------------------------------------------------------------------------------------------------------------------------------------------------------------------------|
|                                               | <p><i>Study design:</i> Feasibility study with quantitative and qualitative measures</p> <p><i>Target population:</i> Adults with a ventricular assist device (VAD)</p> <p><i>Sample size:</i> 21</p> <p><i>Duration of follow-up:</i> 6 months</p> <p><i>Outcome of interest:</i> Proper detection of emergency department utilization by participant and satisfaction with mobile application.</p> | <p>emergency departments (ED) across the U.S. Once the application detected that a participant approached an ED, a prompt was sent to their phone to confirm if they were seeking care at that hospital. If yes, another prompt asked the participant to confirm if the app could notify their VAD healthcare team. If 'yes' to both, a notification was sent to the covering provider's pager with participant name and contact.</p> | <p>patient reported seeking ED care but did not receive a ping.</p> <p>Most patients responded favorable to their impression of the application stating that it "gave them peace of mind."</p>                                                                                            | <p><i>Social</i></p> <p><i>Cognitive:</i> Sense of safety to participants that emergency room and hospitalizations could alert their VAD provider regarding the need to coordinate care</p> |
| <p>Connor &amp; Herzig, 2016</p> <p>Stat!</p> | <p><i>Study purpose:</i> Determine the feasibility and acceptability of a mobile application that allow automatic capture of work hours without manual employee input</p> <p><i>Study design:</i> Feasibility study</p> <p><i>Target population:</i> Anesthesia providers in a private practice group</p> <p><i>Sample size:</i> 198</p>                                                             | <p><i>User input:</i> None</p> <p><i>Mechanism of delivery:</i> Geofences were drawn around hospitals where the anesthesia group provided services. When the provider enters a geofence, their time at the facility is continuously</p>                                                                                                                                                                                               | <p>Use of the geofencing application showed a significant correlation of early departures following late departures the previous day (<math>p &lt; 0.01</math> in 73 of 91 occasions), and better dispersion of working hours (<math>p = 0.002</math>) compared to the previous year.</p> | <p><i>Theoretical framework:</i> None listed</p> <p><i>Behavioral</i></p> <p><i>Social</i></p> <p><i>Cognitive:</i> Sense of security regarding equitable distribution of work</p>          |

|                                            |                                                                                                                                                                                                                                                                                                                                                                                                                                                                                                                                                          |                                                                                                                                                                                                                                                                                                                                |                                                                                                                                                                                                                                                                                                                                                                                                                                                                        |                                                                                                                                                                                                                                                                                                                           |
|--------------------------------------------|----------------------------------------------------------------------------------------------------------------------------------------------------------------------------------------------------------------------------------------------------------------------------------------------------------------------------------------------------------------------------------------------------------------------------------------------------------------------------------------------------------------------------------------------------------|--------------------------------------------------------------------------------------------------------------------------------------------------------------------------------------------------------------------------------------------------------------------------------------------------------------------------------|------------------------------------------------------------------------------------------------------------------------------------------------------------------------------------------------------------------------------------------------------------------------------------------------------------------------------------------------------------------------------------------------------------------------------------------------------------------------|---------------------------------------------------------------------------------------------------------------------------------------------------------------------------------------------------------------------------------------------------------------------------------------------------------------------------|
|                                            | <p><i>Duration of follow-up:</i> 12 months</p> <p><i>Outcome of interest:</i> Equitable workload distribution, employee acceptance and uptake, and reduced dispersion of the amount of overtime worked by staff</p>                                                                                                                                                                                                                                                                                                                                      | <p>checked and reported to a central server. Reports were then used to inform future clinical responsibilities and overtime worked</p>                                                                                                                                                                                         | <p>Acceptance of the mobile application was slow to start but &gt;95% in less than 1 year of roll out</p>                                                                                                                                                                                                                                                                                                                                                              | <p>based on geofenced data and capture of time working for billing purposes</p>                                                                                                                                                                                                                                           |
| <p>Besoain et al., 2020</p> <p>UBESafe</p> | <p><i>Study purpose:</i> Prevent sexually transmitted infections (STIs) by sending preventive measures in risky situations</p> <p><i>Study design:</i> Development and feasibility</p> <p><i>Target population:</i> Men who have sex with men</p> <p><i>Sample size:</i> Development-5; Feasibility- 4</p> <p><i>Duration of follow-up:</i> Development- 2 weeks; Feasibility- 1 month</p> <p><i>Outcome of interest:</i> Development- functional testing to receive user feedback; Feasibility- try the UBESAFE system with all its functionalities</p> | <p><i>User input:</i> Mixed. Hot zones were created by a system administrator and with input from users</p> <p><i>Mechanism of delivery:</i> Geofenced hot zones are areas demines with a high probability for intercourse. When users enter a hot zone, a contextual message to prevent HIV and STIs, and promote testing</p> | <p>All users triggered a geofenced hotzone during the development phase, though this was not quantified further. Hot zones were seen as a necessary component from those testing in the development phase.</p> <p>In the feasibility phase, users tested and rated prevention messages as well as adding their own.</p> <p>Users also contributed to hot zones and tested existing ones, contributing 65% of hot zones in the application at the end of the study.</p> | <p><i>Theoretical framework:</i> Elaboration likelihood model</p> <p><i>Behavioral:</i> Contextual messages for sexual risk reduction sent in hot spots for high-risk intercourse</p> <p><i>Social:</i> Gamification of preventive messages and interaction with others using the application</p> <p><i>Cognitive</i></p> |

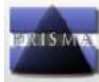

## PRISMA 2020 Checklist

| Section and Topic       | Item # | Checklist item                                                                                                                                                                                                                                                                                       | Location where item is reported                                                                                                                               |
|-------------------------|--------|------------------------------------------------------------------------------------------------------------------------------------------------------------------------------------------------------------------------------------------------------------------------------------------------------|---------------------------------------------------------------------------------------------------------------------------------------------------------------|
| <b>TITLE</b>            |        |                                                                                                                                                                                                                                                                                                      |                                                                                                                                                               |
| Title                   | 1      | Identify the report as a systematic review.                                                                                                                                                                                                                                                          | ✓ title                                                                                                                                                       |
| <b>ABSTRACT</b>         |        |                                                                                                                                                                                                                                                                                                      |                                                                                                                                                               |
| Abstract                | 2      | See the PRISMA 2020 for Abstracts checklist.                                                                                                                                                                                                                                                         |                                                                                                                                                               |
| <b>INTRODUCTION</b>     |        |                                                                                                                                                                                                                                                                                                      |                                                                                                                                                               |
| Rationale               | 3      | Describe the rationale for the review in the context of existing knowledge.                                                                                                                                                                                                                          | ✓ Lines 122-130, 133-134                                                                                                                                      |
| Objectives              | 4      | Provide an explicit statement of the objective(s) or question(s) the review addresses.                                                                                                                                                                                                               | ✓ Lines 123-130, 134-137                                                                                                                                      |
| <b>METHODS</b>          |        |                                                                                                                                                                                                                                                                                                      |                                                                                                                                                               |
| Eligibility criteria    | 5      | Specify the inclusion and exclusion criteria for the review and how studies were grouped for the syntheses.                                                                                                                                                                                          | ✓ Lines 167-171                                                                                                                                               |
| Information sources     | 6      | Specify all databases, registers, websites, organisations, reference lists and other sources searched or consulted to identify studies. Specify the date when each source was last searched or consulted.                                                                                            | ✓ Lines 174-179<br>✓ Lines 179-180                                                                                                                            |
| Search strategy         | 7      | Present the full search strategies for all databases, registers and websites, including any filters and limits used.                                                                                                                                                                                 | ✓ Lines 174-179                                                                                                                                               |
| Selection process       | 8      | Specify the methods used to decide whether a study met the inclusion criteria of the review, including how many reviewers screened each record and each report retrieved, whether they worked independently, and if applicable, details of automation tools used in the process.                     | ✓ Lines 181-189                                                                                                                                               |
| Data collection process | 9      | Specify the methods used to collect data from reports, including how many reviewers collected data from each report, whether they worked independently, any processes for obtaining or confirming data from study investigators, and if applicable, details of automation tools used in the process. | ✓ Lines 182-183<br>✓ Lines 191-198                                                                                                                            |
| Data items              | 10a    | List and define all outcomes for which data were sought. Specify whether all results that were compatible with each outcome domain in each study were sought (e.g. for all measures, time points, analyses), and if not, the methods used to decide which results to collect.                        | ✓ Lines 194-196                                                                                                                                               |
|                         | 10b    | List and define all other variables for which data were sought (e.g. participant and intervention characteristics, funding sources). Describe any assumptions made about any missing or unclear information.                                                                                         | ✓ Lines 220-221, types of geofencing methods; 231-232, intervention content delivery; line 242, outcomes of interest; lines 256, indirect int. outcomes; line |

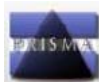

PRISMA 2020 Checklist

| Section and Topic             | Item # | Checklist item                                                                                                                                                                                                                                                               | Location where item is reported                                                                       |
|-------------------------------|--------|------------------------------------------------------------------------------------------------------------------------------------------------------------------------------------------------------------------------------------------------------------------------------|-------------------------------------------------------------------------------------------------------|
|                               |        |                                                                                                                                                                                                                                                                              | 269, acceptability measures; line 280, place-based mechanisms; line 293, reporting & quality measures |
| Study risk of bias assessment | 11     | Specify the methods used to assess risk of bias in the included studies, including details of the tool(s) used, how many reviewers assessed each study and whether they worked independently, and if applicable, details of automation tools used in the process.            | ✓ Lines 182-189                                                                                       |
| Effect measures               | 12     | Specify for each outcome the effect measure(s) (e.g. risk ratio, mean difference) used in the synthesis or presentation of results.                                                                                                                                          | NA                                                                                                    |
| Synthesis methods             | 13a    | Describe the processes used to decide which studies were eligible for each synthesis (e.g. tabulating the study intervention characteristics and comparing against the planned groups for each synthesis (item #5)).                                                         | ✓ lines 201-207                                                                                       |
|                               | 13b    | Describe any methods required to prepare the data for presentation or synthesis, such as handling of missing summary statistics, or data conversions.                                                                                                                        | NA                                                                                                    |
|                               | 13c    | Describe any methods used to tabulate or visually display results of individual studies and syntheses.                                                                                                                                                                       |                                                                                                       |
|                               | 13d    | Describe any methods used to synthesize results and provide a rationale for the choice(s). If meta-analysis was performed, describe the model(s), method(s) to identify the presence and extent of statistical heterogeneity, and software package(s) used.                  | NA                                                                                                    |
|                               | 13e    | Describe any methods used to explore possible causes of heterogeneity among study results (e.g. subgroup analysis, meta-regression).                                                                                                                                         | NA                                                                                                    |
|                               | 13f    | Describe any sensitivity analyses conducted to assess robustness of the synthesized results.                                                                                                                                                                                 | NA                                                                                                    |
| Reporting bias assessment     | 14     | Describe any methods used to assess risk of bias due to missing results in a synthesis (arising from reporting biases).                                                                                                                                                      | ✓ Lines 295-301                                                                                       |
| Certainty assessment          | 15     | Describe any methods used to assess certainty (or confidence) in the body of evidence for an outcome.                                                                                                                                                                        | ✓Line 301                                                                                             |
| <b>RESULTS</b>                |        |                                                                                                                                                                                                                                                                              |                                                                                                       |
| Study selection               | 16a    | Describe the results of the search and selection process, from the number of records identified in the search to the number of studies included in the review, ideally using a flow diagram.                                                                                 | ✓Lines 201-307                                                                                        |
|                               | 16b    | Cite studies that might appear to meet the inclusion criteria, but which were excluded, and explain why they were excluded.                                                                                                                                                  | ✓Lines 203-206                                                                                        |
| Study characteristics         | 17     | Cite each included study and present its characteristics.                                                                                                                                                                                                                    | ✓ Table, page 18                                                                                      |
| Risk of bias in studies       | 18     | Present assessments of risk of bias for each included study.                                                                                                                                                                                                                 | ✓Line 301                                                                                             |
| Results of individual studies | 19     | For all outcomes, present, for each study: (a) summary statistics for each group (where appropriate) and (b) an effect estimate and its precision (e.g. confidence/credible interval), ideally using structured tables or plots.                                             | ✓Appendix 1                                                                                           |
| Results of syntheses          | 20a    | For each synthesis, briefly summarise the characteristics and risk of bias among contributing studies.                                                                                                                                                                       | ✓Line 221-292                                                                                         |
|                               | 20b    | Present results of all statistical syntheses conducted. If meta-analysis was done, present for each the summary estimate and its precision (e.g. confidence/credible interval) and measures of statistical heterogeneity. If comparing groups, describe the direction of the | NA                                                                                                    |

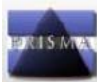

# PRISMA 2020 Checklist

| Section and Topic                              | Item # | Checklist item                                                                                                                                                                                                                             | Location where item is reported |
|------------------------------------------------|--------|--------------------------------------------------------------------------------------------------------------------------------------------------------------------------------------------------------------------------------------------|---------------------------------|
|                                                |        | effect.                                                                                                                                                                                                                                    |                                 |
|                                                | 20c    | Present results of all investigations of possible causes of heterogeneity among study results.                                                                                                                                             | NA                              |
|                                                | 20d    | Present results of all sensitivity analyses conducted to assess the robustness of the synthesized results.                                                                                                                                 | NA                              |
| Reporting biases                               | 21     | Present assessments of risk of bias due to missing results (arising from reporting biases) for each synthesis assessed.                                                                                                                    | Lines 346-350; Line 301         |
| Certainty of evidence                          | 22     | Present assessments of certainty (or confidence) in the body of evidence for each outcome assessed.                                                                                                                                        | Lines 346-350; Line 301         |
| <b>DISCUSSION</b>                              |        |                                                                                                                                                                                                                                            |                                 |
| Discussion                                     | 23a    | Provide a general interpretation of the results in the context of other evidence.                                                                                                                                                          |                                 |
|                                                | 23b    | Discuss any limitations of the evidence included in the review.                                                                                                                                                                            | Lines 344-349                   |
|                                                | 23c    | Discuss any limitations of the review processes used.                                                                                                                                                                                      | 346-347                         |
|                                                | 23d    | Discuss implications of the results for practice, policy, and future research.                                                                                                                                                             | Lines 352-362                   |
| <b>OTHER INFORMATION</b>                       |        |                                                                                                                                                                                                                                            |                                 |
| Registration and protocol                      | 24a    | Provide registration information for the review, including register name and registration number, or state that the review was not registered.                                                                                             | Line 180                        |
|                                                | 24b    | Indicate where the review protocol can be accessed, or state that a protocol was not prepared.                                                                                                                                             | Line 180                        |
|                                                | 24c    | Describe and explain any amendments to information provided at registration or in the protocol.                                                                                                                                            | NA                              |
| Support                                        | 25     | Describe sources of financial or non-financial support for the review, and the role of the funders or sponsors in the review.                                                                                                              | √Page 19                        |
| Competing interests                            | 26     | Declare any competing interests of review authors.                                                                                                                                                                                         | √ Page 19                       |
| Availability of data, code and other materials | 27     | Report which of the following are publicly available and where they can be found: template data collection forms; data extracted from included studies; data used for all analyses; analytic code; any other materials used in the review. | Data sharing statement page 19  |

From: Page MJ, McKenzie JE, Bossuyt PM, Boutron I, Hoffmann TC, Mulrow CD, et al. The PRISMA 2020 statement: an updated guideline for reporting systematic reviews. *BMJ* 2021;372:n71. doi: 10.1136/bmj.n71  
 For more information, visit: <http://www.prisma-statement.org/>

# BMJ Open

## Use of Geofencing Interventions in Population Health Research: A Scoping Review

|                                 |                                                                                                                                                                                                                                                                                                                                                                                                                                                                                                                                               |
|---------------------------------|-----------------------------------------------------------------------------------------------------------------------------------------------------------------------------------------------------------------------------------------------------------------------------------------------------------------------------------------------------------------------------------------------------------------------------------------------------------------------------------------------------------------------------------------------|
| Journal:                        | <i>BMJ Open</i>                                                                                                                                                                                                                                                                                                                                                                                                                                                                                                                               |
| Manuscript ID                   | bmjopen-2022-069374.R1                                                                                                                                                                                                                                                                                                                                                                                                                                                                                                                        |
| Article Type:                   | Original research                                                                                                                                                                                                                                                                                                                                                                                                                                                                                                                             |
| Date Submitted by the Author:   | 26-Jun-2023                                                                                                                                                                                                                                                                                                                                                                                                                                                                                                                                   |
| Complete List of Authors:       | Tobin, Karin ; Johns Hopkins University Bloomberg School of Public Health, Health, Behavior and Society<br>Heidari, Omeid; University of Washington School of Nursing, Child, Family and Population Health Nursing<br>Volpi, Connor; Johns Hopkins University Bloomberg School of Public Health, Health, Behavior and Society<br>Sodder, Shereen; Johns Hopkins University Bloomberg School of Public Health, Health, Behavior and Society<br>Duncan, Dustin; Columbia University Mailman School of Public Health, Department of Epidemiology |
| <b>Primary Subject Heading</b>: | Public health                                                                                                                                                                                                                                                                                                                                                                                                                                                                                                                                 |
| Secondary Subject Heading:      | Mental health                                                                                                                                                                                                                                                                                                                                                                                                                                                                                                                                 |
| Keywords:                       | EPIDEMIOLOGY, HIV & AIDS < INFECTIOUS DISEASES, MENTAL HEALTH, PUBLIC HEALTH                                                                                                                                                                                                                                                                                                                                                                                                                                                                  |
|                                 |                                                                                                                                                                                                                                                                                                                                                                                                                                                                                                                                               |

SCHOLARONE™  
Manuscripts





I, the Submitting Author has the right to grant and does grant on behalf of all authors of the Work (as defined in the below author licence), an exclusive licence and/or a non-exclusive licence for contributions from authors who are: i) UK Crown employees; ii) where BMJ has agreed a CC-BY licence shall apply, and/or iii) in accordance with the terms applicable for US Federal Government officers or employees acting as part of their official duties; on a worldwide, perpetual, irrevocable, royalty-free basis to BMJ Publishing Group Ltd ("BMJ") its licensees and where the relevant Journal is co-owned by BMJ to the co-owners of the Journal, to publish the Work in this journal and any other BMJ products and to exploit all rights, as set out in our [licence](#).

The Submitting Author accepts and understands that any supply made under these terms is made by BMJ to the Submitting Author unless you are acting as an employee on behalf of your employer or a postgraduate student of an affiliated institution which is paying any applicable article publishing charge ("APC") for Open Access articles. Where the Submitting Author wishes to make the Work available on an Open Access basis (and intends to pay the relevant APC), the terms of reuse of such Open Access shall be governed by a Creative Commons licence – details of these licences and which [Creative Commons](#) licence will apply to this Work are set out in our licence referred to above.

Other than as permitted in any relevant BMJ Author's Self Archiving Policies, I confirm this Work has not been accepted for publication elsewhere, is not being considered for publication elsewhere and does not duplicate material already published. I confirm all authors consent to publication of this Work and authorise the granting of this licence.

## Use of Geofencing Interventions in Population Health Research: A Scoping Review

Karin E. Tobin, PhD<sup>a\*</sup>

Omeid Heidari, PhD<sup>b\*</sup>

Connor Volpi, MPH<sup>a</sup>

Shereen Sodder, MSPH<sup>a</sup>

Dustin T. Duncan, ScD<sup>c</sup>

<sup>a</sup>Department of Health, Behavior and Society, John Hopkins University Bloomberg School of Public Health, Baltimore, MD

<sup>b</sup>Department of Child, Family and Population Health Nursing, University of Washington, School of Nursing, Seattle, WA

<sup>c</sup>Department of Epidemiology, Columbia University Mailman School of Public Health, New York, NY

\*Co-first authors

**Correspondence:** Karin Tobin, PhD, Department of Health, Behavior and Society, John Hopkins University Bloomberg School of Public Health, 2213 McElderry Street, 2nd Floor, Baltimore, Maryland 21205

Ktobin2@jhu.edu

**Word Count Manuscript: 3261**

## Abstract

**Objectives:** Technological advancements that utilize global positioning system (GPS), such as geofencing, provide the opportunity to examine place-based context in population health research. To systematically identify, assess, and synthesize the existing evidence on geofencing intervention design, acceptability, feasibility, and/or impact.

**Design:** A scoping review using the PRISMA-ScR guidance for reporting.

**Data Sources:** PubMed, CINAHL, EMBASE Web of Science, Cochrane, and PsychINFO for articles in English published by December 31<sup>st</sup>, 2021.

**Eligibility Criteria:** Articles were included if geofencing was utilized as a mechanism for intervention delivery. Exclusion criteria: 1) a component or combination of GPS, geographic information system (GIS), or ecological momentary assessment (EMA) was utilized without delivery of an intervention; 2) did not include a health or health-related outcome from the geofencing intervention; or 3) was not a peer-reviewed study.

**Data extraction and synthesis:** Several researchers independently reviewed all abstracts and full-text articles for final inclusion.

**Results:** A total of 2171 articles were found. Nine studies were included. The majority were published in five years preceding the search (89%). Geofences in most studies (n=5) were fixed and programmed in the mobile application carried by participants without their input. Mechanisms of geofencing interventions were classified as direct or indirect with five studies (56%) utilized direct interventions. There was a variety of health outcomes (from smoking to problematic alcohol use) across the five studies that utilized an direct geofencing intervention.

**Conclusions:** This review found geofencing to be an emerging technology that is an acceptable and feasible intervention applied to various populations and health outcomes. Future studies

1  
2  
3 should specify the rationale for the locations that are geofenced and user input. Moreover,  
4  
5 attention to mechanisms of actions will enable scientists to understand not only whether  
6  
7 geofencing is an appropriate and effective intervention but why it works to achieve the outcomes  
8  
9 we observe.  
10  
11  
12  
13  
14  
15  
16  
17  
18  
19  
20  
21  
22  
23  
24  
25  
26  
27  
28  
29  
30  
31  
32  
33  
34  
35  
36  
37  
38  
39  
40  
41  
42  
43  
44  
45  
46  
47  
48  
49  
50  
51  
52  
53  
54  
55  
56  
57  
58  
59  
60

For peer review only

### Strengths and Limitations

- The scoping review was comprehensive utilizing six rigorous databases.
- The review used the Preferred Reporting Items for Systematic Reviews and Meta-analyses extension for Scoping Reviews (PRISMA-ScR) checklist.
- The review only included studies conducted in the United States which has limited generalizability to other international settings.
- The review was conducted through the published literature through 2021 and therefore does not include more recent publications.

## Introduction

Population health outcomes and health disparities result from multi-level factors beyond the individual. For example, poverty can lead to a lack of access to healthy food<sup>1</sup> and medical care<sup>2</sup>; unstable housing can lead to inability to adhere to medications<sup>3</sup> and exposures to unhealthy environments<sup>4</sup>; homophobia and racism leads to stigma and discrimination, and mistrust and avoidance of medical systems.<sup>5-7</sup>

Often in behavioral research, theories or frameworks do not consider the place-based context of behavior despite literature on the consistent and enduring impact of places such as neighborhoods and communities on population health outcomes and disparities.<sup>8-10</sup> Place-based context can be conceptualized as both geographic areas defined by boundaries or as socially constructed out of symbolic meanings *and* social relations.<sup>11,12</sup> In both cases, place-based context operates to perpetuate hierarchical social structures, facilitate and constrain resources, and protect or hinder health. Moreover, place-based context may facilitate specific health-related interactions such as drug or alcohol use, experiences of violence, or engagement in healthcare. Yet behavioral interventions often conceptualize place-based context as static (e.g., place of risky sex) and do not consider how place-based contexts vary over time. Real-time geospatial methods, including the use of global positioning system (GPS) technology, are the cutting-edge, best-suited methods to overcome limitations of most neighborhoods and other environments health research because they better capture place-based contexts corresponding to individuals' lived experiences, referred to as "activity space".<sup>14-13</sup>

There are numerous types of GPS-based methods that collect data from individuals and in some cases deliver intervention content. For example, ecological momentary assessment (EMA) has been shown to be an acceptable method of data collection.<sup>14</sup> Ecological Momentary

1  
2  
3 Interventions (EMI) allow researchers to deliver intervention content through mobile devices.<sup>15</sup>  
4  
5 Just-in-time adaptive interventions (JITAI) attempt to address the changing needs of an  
6  
7 individual where the intervention algorithm is programmed to determine if and what intervention  
8  
9 content should be delivered to participants at set times throughout the day, whenever a  
10  
11 participant requests one, or based on the participant's current state (e.g., stress) or environmental  
12  
13 changes (e.g., weather).<sup>16-17</sup> Finally, geofences are virtual boundaries drawn around a location  
14  
15 and allow for monitoring and messaging when individuals enter or exits the geofenced  
16  
17 parameter.<sup>18</sup> Geofencing interventions are a subset of JITAI where there is continuous  
18  
19 monitoring of the participant's location using GPS and delivery of an intervention such as text  
20  
21 messages or links to health information or information about health services that are in the area  
22  
23 based on a spatial context trigger. A geofence involves creating virtual predefined set of  
24  
25 boundaries or "fences" around a geographic location, including using GPS technology.  
26  
27 Geofencing methodology can be used in public health research – both in observational and  
28  
29 intervention studies. Thus, geofencing can be a valuable tool in intervention research, enabling  
30  
31 researchers to study and implement interventions in specific geographic areas. For example,  
32  
33 geofencing allows researchers to precisely target specific areas for intervention. In addition,  
34  
35 geofencing allows researchers to send location-based notifications (an intervention) to  
36  
37 participants, including on their mobile devices. One example of this in the public health setting  
38  
39 is the use of geofencing to monitor movements of individuals who tested positive for COVID-19  
40  
41 virus.<sup>19</sup>  
42  
43  
44  
45  
46  
47  
48

49       Reviews of JITAI and EMI show the promising potential of this evolving technology<sup>20-22</sup>,  
50  
51 yet, such reviews are noted to lack the inclusion of geofencing, representing a major gap in the  
52  
53 literature. This gap is vital to address as geofencing has the capability to address an array of  
54  
55  
56  
57  
58  
59  
60

1  
2  
3 different health issues ranging from tobacco cessation to HIV medication adherence. The lack of  
4 a clear and systematic understanding of the scope of geofencing interventions undermines its  
5 potential to impact population health. The purpose of this scoping review is to describe of the  
6 state of the evidence on geofencing intervention design, acceptability, feasibility, and impact. In  
7 addition, we examine what behavioral mechanisms were targeted across the interventions  
8 assessed, as discussed below.  
9

### 19 *Conceptualizing mechanisms of action*

20  
21 Another limitation in the literature of EMA and JITAI interventions is the lack of attention to  
22 specific mechanisms of action that operate to achieve outcomes.<sup>23</sup> Therefore, we sought to  
23 develop a framework based on several complementary theories and frameworks (e.g., Turan's  
24 HIV Stigma Framework and Social Cognitive Theory<sup>24-26</sup>) to evaluate geofencing interventions  
25 included in this review. The framework posits three key mechanisms operate for place-based  
26 context to influence health outcomes (Figure 1). Each mechanism has both a protective and risk  
27 dimension. The Cognitive mechanism includes cognitive processes such as sense of control,  
28 knowledge, attitudes, self-efficacy, maladaptive thoughts, risk perceptions and internalized  
29 stigma.<sup>27-32</sup> The Behavioral mechanism refers to both protective behaviors such as adaptive  
30 coping as well as risky behaviors such substance use, condomless sex and non-adherence to  
31 medication and care.<sup>33-35</sup> <sup>36</sup> The Social mechanism refers to interactions with others in the  
32 personal social networks and broader community such as emotional or instrumental support or  
33 enacted stigma and conflict which have been shown to exacerbate or mitigate health outcomes.<sup>37-</sup>  
34  
35  
36  
37  
38  
39  
40  
41  
42  
43  
44  
45  
46  
47  
48  
49  
50  
51  
52  
53  
54  
55  
56  
57  
58  
59  
60

<sup>39</sup> The framework can be applied to multiple spatial scales from a micro-level (e.g. a room in



1  
2  
3 one's residence) to community-level (e.g. a neighborhood activity space or census tract) to  
4  
5 macro (e.g. state, region).  
6

7 [Figure 1 here]  
8  
9  
10

## 11 **Methods**

12  
13  
14 This systematic review was conducted in accordance with the 2018 PRISMA Extension for  
15  
16 Scoping Reviews checklist.<sup>40</sup>  
17  
18

### 19 *Inclusion criteria*

20  
21  
22 Articles were only included if they included if geofencing was utilized as a mechanism for  
23  
24 intervention delivery. Articles were excluded if 1) a component or combination of GPS,  
25  
26 geographic information system (GIS), or ecological momentary assessment (EMA) was utilized  
27  
28 without delivery of an intervention; 2) did not include a health or health-related outcome from  
29  
30 the geofencing intervention; or 3) was not a peer-reviewed study.  
31  
32  
33

### 34 *Search strategy*

35  
36  
37 Authors first met to develop the list of potential search terms and refined after initial searches  
38  
39 were conducted. Then searches were conducted in PubMed, CINAHL, EMBASE Web of  
40  
41 Science, Cochrane, and PsychINFO for articles published through the end of 2021 (Appendix 1).  
42  
43 Search terms were for broad concepts regarding mobile delivery of a geofencing intervention:  
44  
45 "Geographic Information Systems"; "Georeferencing"; "Global Positioning System"; or  
46  
47 "Geofenc\*" combined with "Smartphone" or "Mobile Applications." The search was conducted  
48  
49  
50  
51  
52 on 12/1/2022 and was not registered. A protocol was not prepared.  
53  
54  
55  
56  
57  
58  
59  
60

### *Study selection*

Screening of article titles and abstracts was conducted with two reviewers (SS, CV) in maximize scrutiny of all records. Each reviewer independently screened all articles identified from the initial search for relevance to the pre-defined inclusion criteria that was highlighted during a training session where it was emphasized that the reviewers should apply a liberal approach. Next, the same two reviewers independently reviewed each of the full texts for inclusion in the data extraction phase. Any disagreements in both phases were adjudicated by a third reviewer (OH). In all phases reviewers were not blinded to authors, funding, or information regarding publication of all the records.

### *Data extraction*

Two reviewers (OH, KT) extracted data for details of study design, target population, sample size, duration of follow-up, theoretical framework, software or mobile application use, goal, and mechanism of geofenced intervention, and impact of the intervention of outcomes. Place-based mechanisms associated with the intervention included: 1) Behavioral, 2) Social support: Emotional, Instrumental, Informational, and Social monitoring, and 3) Cognitive. Finally, established guidance for reporting health intervention using mobile phone was utilized to evaluate the quality of each article.<sup>41</sup>

### *Patient and Public Involvement*

None

## **Results**

### *Included studies*

1  
2  
3 Using the search strategy in six identified databases, a total of 2,171 articles were found after  
4 removing duplicates. 2,039 (94%) studies were irrelevant and 132 (6%) full text studies were  
5 assessed for eligibility (Supplementary Table 1). Reasons for exclusion of the 123 articles in the  
6 full-text phases included the article not being peer reviewed (n=46, 37%), a review articles  
7 (n=19, 16%), was not the correct study design or intervention (n=14, 11%), or utilized a  
8 combination of GPS, GIS, and or Ecological Momentary Assessment, but was not a geofencing  
9 intervention (n=44, 36%). Nine studies were included in this scoping review.  
10  
11  
12  
13  
14  
15  
16  
17  
18  
19  
20

### 21 *Study characteristics*

22 The majority were published in five years preceding the search (89%) (Supplemental Table 1).  
23  
24 Most employed a pre/post study design to assess changes in measured outcome or feasibility and  
25 acceptability of the geofencing intervention (78%) with 2 unblinded randomized control trials.  
26  
27 Sample sizes ranged from 4 to 3,443; one study's intervention quantified its reach with the  
28 geofencing intervention displaying on 516,073 mobile phones, though these impressions do not  
29 represent unique individuals receiving the intervention.<sup>42</sup> Most studies (78%) were conducted in  
30 the United States, one in the United Kingdom<sup>43</sup> and one in Spain.<sup>23</sup>  
31  
32 A description of studies, including the names of the mobile applications used, study design and  
33 characteristics, and place-based mechanisms are detailed in Supplemental Table 1.  
34  
35 The design of the geofencing interventions varied based on user input and content delivery.  
36  
37  
38  
39  
40  
41  
42  
43  
44  
45  
46

### 47 *Geofencing methods: User input*

48  
49 Geofences in most studies (n=5) were fixed and programmed in the mobile application without  
50 participant input. These included hospital emergency departments<sup>18,44</sup>, hospitals where  
51 participants worked<sup>45,46</sup>, and a specific rural dental clinic<sup>42</sup>. Two studies utilized participants  
52  
53  
54  
55  
56  
57  
58  
59  
60

1  
2  
3 input in determining where to geofence related to smoking<sup>43</sup> or problematic alcohol use<sup>47</sup>. Two  
4  
5 studies utilized a mix of fixed and user input. Dorsch et al. utilized user input to geofence  
6  
7 locations where foods were consumed or purchased as well as a cloud-based web service to  
8  
9 predict when participants entered grocery stores or restaurants. Besoain et al., used a moderated  
10  
11 system where participants suggested locations to geofence that were venues for high-risk sexual  
12  
13 encounters, but these venues were moderated by the study team and locations could be added or  
14  
15 removed.  
16  
17  
18  
19  
20

### 21 *Intervention content delivery: Direct versus Indirect*

22  
23 Intervention content was delivered in direct or indirect methods. Five studies (56%) sent  
24  
25 participants intervention content directly to their phones based on triggering the geofence  
26  
27 boundary. These interventions included informing individuals living in a rural area of a dental  
28  
29 clinic<sup>42</sup> or sending behavioral messages regarding problematic alcohol use when near a bar<sup>47</sup>,  
30  
31 smoking cessation in areas detected as high likelihood of smoking<sup>43</sup>, making low-sodium diet  
32  
33 choices in grocery stores, restaurants, or at home, or HIV and STI prevention messages when in  
34  
35 venues associated with high-risk sexual activity<sup>23</sup>. The remaining 4 studies were categorized as  
36  
37 indirect as they collected data when participants triggered geofence boundaries and in some  
38  
39 cases delivered content at a later time from when the fence was triggered.  
40  
41  
42  
43  
44  
45  
46

### 47 *Impact of the interventions*

48  
49 There was not a consistent health outcome across the five studies that utilized a direct  
50  
51 intervention. Both studies that utilized a randomized control design showed improved outcomes  
52  
53 in the group randomized to geofencing. A-CHESS sent context and place-based messages and  
54  
55  
56  
57  
58  
59  
60

1  
2  
3 included multiple other services such as a phone and data plan, access to a virtual counselor, and  
4 other interactive features (Table 1).<sup>47</sup> LowSalt4Life contained features including low sodium  
5 options and alternatives at grocery stores or restaurants, and the ability to scan product barcodes  
6 to find similar low sodium options. Q Sense intervention participants decreased from 60% of  
7 pre-quit smoking days to 39% post-quit. UBESafe intervention reported that all participants were  
8 able to trigger a hot zone where sexual contacts often took place and received a place-based  
9 prevention message.<sup>22</sup> Finally, Wright et al.,<sup>41</sup> used a pre/post design, and found increases in  
10 community knowledge about the dental clinic ( $p=0.045$ ) and increased number of dental visits  
11 post intervention.  
12  
13  
14  
15  
16  
17  
18  
19  
20  
21  
22  
23  
24  
25

### 26 *Indirect intervention outcomes*

27  
28 Two studies used the geofence to track time working from medical practitioners or surgical  
29 residents (Supplemental Table 1). Owei et al., found the mean number of working hour  
30 violations for surgical residents' post-intervention significantly decreased ( $p=0.04$ ) compared to  
31 pre-intervention and compared to the previous year ( $p<0.01$ ).<sup>44</sup> Connor et al., showed a  
32 significant correlation of early departures from operating room duties following late departures  
33 the previous day ( $p<0.01$ ) and better dispersion of working hours ( $p=0.002$ ) compared to the  
34 previous year.<sup>45</sup> Two other studies geofenced major hospitals to detect hospitalization of high  
35 priority patients. Nguyen et al., found the geofenced mobile application detected 800 unique  
36 participants who triggered a geofence, with a predictive value of true hospitalization between 65-  
37 78%.<sup>18</sup> Similarly, from a sample size of 21, 4 of the participants activated the alert system for  
38 patients with a ventricular assist device to their on-call care team when they triggered an  
39 emergency room geofence.<sup>44</sup>  
40  
41  
42  
43  
44  
45  
46  
47  
48  
49  
50  
51  
52  
53  
54  
55  
56  
57  
58  
59  
60

### *Acceptability measures*

Five studies reported data regarding acceptability of the geofencing mobile application in which all participants were positive regarding the value of the intervention. Participants in two studies with indirect intervention found the application useful and described knowledge of being monitored provided a sense of security<sup>44,45</sup>. Additionally, participants in two studies did not have concerns regarding the continuous geolocation tracking for intervention purpose<sup>43,45</sup>, but did stress the importance of transparency regarding the use of this data<sup>43</sup>. Finally, in one interactive study, participants contributed to the creation and curation of geofenced hot zones as well as the prevention messages received when hot zones were triggered, accounting for 67% of hot zones created and used by the study<sup>23</sup>.

### *Place-based mechanisms*

Four studies utilized a behavioral mechanism in their geofencing intervention.<sup>23,43,47,48</sup> Four studies utilized a social mechanism which included informational support such as existence of a rural dental clinic<sup>42</sup> and availability of menu grocery store items that were low in sodium.<sup>23,42,47,48</sup> Additionally, participants were able to interact with counselors through the application and review their data concerning visiting high-risk locations for further intervention<sup>47</sup> or sharing context specific messages with other users on the application.<sup>23</sup> Finally, five studies utilized a cognitive mechanism that provided the participant a sense of safety, security, or knowing that their information was captured.<sup>46,47</sup> These included reporting to care teams when the participants

1  
2  
3 were hospitalized<sup>18,44</sup>, capture of time and effort spent working in a clinical environment<sup>45,46</sup>, and  
4 participants counselor viewing their location and interacting with their place-based data of  
5 proximity and time spent in high-risk areas for binge drinking.<sup>47</sup>  
6  
7

### 8 9 10 *Reporting and quality measures*

11  
12 From the 16-point checklist, all included studies reported on 6 items (Supplemental Table 2).  
13  
14 Position Health<sup>44</sup>, Stat!<sup>46</sup>, and ResQ<sup>45</sup> studies described how the intervention and data collected  
15 integrated into an existing health information system and described some data security  
16 procedures. A-CHESS<sup>47</sup> and the Wright et al.,<sup>41</sup> intervention conducted some cost assessment  
17 regarding the delivery of the intervention or cost to the participant to utilize the participant.  
18  
19 Finally, no study reported on compliance of the intervention or data collection mechanism  
20 compliance with national guidelines or federal statutes. We did not assess confidence in the body  
21 of evidence or risk of bias.  
22  
23  
24  
25  
26  
27  
28  
29  
30  
31  
32

## 33 **Discussion**

34  
35 The purpose of this review was to describe the use of geofencing as an intervention and  
36 mechanisms that were targeted to achieve various health outcomes. A geofence involves  
37 creating virtual predefined set of boundaries or “fences” around a geographic location, including  
38 using GPS technology. Geofencing methodology can be used in public health research – both in  
39 observational and intervention studies. Thus, geofencing can be a valuable tool in intervention  
40 research, enabling researchers to study and implement interventions in specific geographic areas.  
41  
42 For example, geofencing allows researchers to precisely target specific areas for intervention. In  
43 addition, geofencing allows researchers to send location-based notifications (an intervention) to  
44 participants, including on their mobile devices. We identified only 9 studies that fit criteria and  
45  
46  
47  
48  
49  
50  
51  
52  
53  
54  
55  
56  
57  
58  
59  
60

1  
2  
3 as expected, most publications were relatively recent. We found that the design of the  
4  
5 geofencing intervention varied yet acceptability was good among study participants and impact  
6  
7 was not assessed in all studies.  
8  
9

10 Of the studies included, only one was focused on a sexual and gender minority sample  
11  
12 and only one with majority Black, Indigenous People of Color (BIPOC), who experience  
13  
14 disparities on a vast number of health outcomes due to social and structural factors such as  
15  
16 racism and homophobia.<sup>23</sup> Lack of inclusion of these populations is a significant gap that should  
17  
18 be monitored as more studies are conducted. In addition, most studies were in the U.S. (North  
19  
20 America) with no studies in developing countries, South America, Africa or Asia, which could  
21  
22 represent an important opportunity.  
23  
24  
25

26 The included studies described a range of user input of the geofenced locations from  
27  
28 researcher only selection to user selection. This characteristic of an intervention merits  
29  
30 consideration. User selection of geofenced locations may be prone to bias and recall issues.<sup>49</sup>  
31  
32 Researcher selected locations may not consider the variability of their sample's place-based  
33  
34 contexts and may under count locations that should be geofenced. The hybrid approach has the  
35  
36 potential to address both limitations. Future studies using geofencing technology may warrant  
37  
38 comparative studies of the user input approaches and be specific about the rationale for the type  
39  
40 of locations that are geofenced and the user input of these so that studies can be comparable and  
41  
42 be conducted in non-western contexts.  
43  
44  
45

46 Some of the interventions explicitly identified a theoretical model or foundation, and all  
47  
48 the studies described targeting at least one of the mechanisms of action from our proposed  
49  
50 framework. The studies in which the geofencing intervention targeted the cognitive mechanism  
51  
52 were primarily addressing surveillance of the participants and messages to cue cognitions about  
53  
54  
55  
56  
57  
58  
59  
60



1  
2  
3 their location. Cueing is a significant component of many effective interventions as they serve as  
4 reminders to engage in behaviors of interest.<sup>50-52</sup> For example, wearing a bracelet that has a  
5 phrase as a reminder to take medication. Cues can focus on both the protective and risk  
6 dimensions of the mechanism. For example, if an individual triggers a geofence of a place they  
7 have identified as associated with a sense of control, a geofencing intervention could sent a text  
8 message that reminds the individual to to engage in self-care. In places where stigma is  
9 anticipated a geofencing intervention can send a text message that reminds the individual about  
10 adaptive coping behaviors.  
11  
12  
13  
14  
15  
16  
17  
18  
19  
20

21  
22 Studies utilizing the behavioral mechanism described very specific behavioral targets  
23 such as buying lower sodium food, avoiding places of alcohol use, condom use and smoking  
24 cessation. As building self-efficacy is a well-established theoretical construct necessary for  
25 behavioral change<sup>24</sup>, future studies should include opportunities to watch the desired behaviors  
26 be role-modeled and practiced to enhance the efficacy of the geofencing intervention.<sup>53</sup>  
27  
28  
29  
30  
31  
32

33  
34 Studies that utilized the social mechanism were focused on the provision of both  
35 informational and emotional support. One study included a component in which the participants  
36 could create messages for other user of the geofencing application. As there are different types of  
37 social support (e.g., emotional, appraisal, economic and informational) future studies should be  
38 specific and transparent about the types being targeted. With additional geofencing studies, a  
39 future review can be conducted using meta-analytic methods to determine the quantitative  
40 effectiveness of geofencing interventions in population health research.  
41  
42  
43  
44  
45  
46  
47  
48  
49  
50

## 51 *Limitations*

52  
53  
54  
55  
56  
57  
58  
59  
60

1  
2  
3 The search strategy was limited to English articles in PubMed, CINAHL, EMBASE Web of  
4 Science, Cochrane, and PsychINFO and we acknowledge other publications may not have been  
5 captured with these. There was heterogeneity in how studies reported intervention development,  
6 theoretical frameworks, and feasibility and acceptability of the intervention. This reduced the  
7 ability to properly assess the extent of behavioral mechanism utilized for the given outcome.  
8  
9  
10  
11  
12  
13  
14 Additionally, as geofencing is a new technology, not many peer-reviewed articles have been  
15 published and this scoping review chose to exclude conference abstracts.  
16  
17  
18  
19  
20

### 21 *Conclusions*

22  
23 In conclusion, this scoping review indicates that geofencing is an emerging acceptable and  
24 feasible intervention that has been applied to a variety populations and health outcomes.<sup>23</sup>  
25  
26 Attention to the mechanisms of actions will enable the field to understand not only whether  
27 geofencing is an appropriate and effective intervention but why it works to achieve the outcomes  
28 we observe. There is a need for future research that includes sexual and gender minority and  
29 BIPOC populations and populations from non-Western contexts to achieve the Health People  
30 Framework objectives given the persistent findings that BIPOC and SGM populations. These  
31 studies could address those health outcomes where disparities are stark such as HIV/AIDS,  
32 cardiovascular, diabetes, COVID-related and mpox. Finally, future research can reveal place-  
33 based contexts that have not been considered which can inform resource allocation and targets  
34 for health-promoting policies.  
35  
36  
37  
38  
39  
40  
41  
42  
43  
44  
45  
46  
47  
48  
49  
50

51 Figure Caption: Types of mechanisms of action, protective and risk factors as well as spatial  
52 scales in geofencing interventions in population health research.  
53

### 54 **Contributorship statement**

55  
56  
57  
58  
59  
60

1  
2  
3 Drs. Tobin and Heidari contributed equally to this manuscript.

4 KT, OH and DD planned the study.

5 KT, OH, CV and SS acquired data and conducted the analysis for this study.

6 KT, OH and DD equally contributed to writing and finalizing the manuscript.

7  
8 **Competing interests**

9 Karin E. Tobin, Omeid Heidari, Connor Volpi, Shereen Sodder and Dustin T. Duncan declare  
10 that they have no conflict of interest.  
11

12 **Funding**

13 This work was supported by a grant from the National Institute of Mental Health R34MH118178  
14  
15

16 **Data sharing statement**

17 All data relevant to the study are included in the article or uploaded as supplementary  
18 information  
19

20 **Ethics Approval**

21 Ethics approval was not required as the scoping review is based on published studies,  
22  
23  
24  
25  
26  
27  
28  
29  
30  
31  
32  
33  
34  
35  
36  
37  
38  
39  
40  
41  
42  
43  
44  
45  
46  
47  
48  
49  
50  
51  
52  
53  
54  
55  
56  
57  
58  
59  
60

## References:

1. Larson NI, Story MT, Nelson MC. Neighborhood environments: disparities in access to healthy foods in the US. *American journal of preventive medicine*. 2009;36(1):74-81. e10.
2. Lazar M, Davenport L. Barriers to health care access for low income families: a review of literature. *Journal of community health nursing*. 2018;35(1):28-37.
3. Kalichman SC, Kalichman MO. HIV-related stress and life chaos mediate the association between poverty and medication adherence among people living with HIV/AIDS. *Journal of clinical psychology in medical settings*. 2016;23(4):420-430.
4. Taylor SE, Repetti RL, Seeman T. Health psychology: what is an unhealthy environment and how does it get under the skin? *Annual review of psychology*. 1997;48
5. Earnshaw VA, Bogart LM, Dovidio JF, Williams DR. Stigma and racial/ethnic HIV disparities: moving toward resilience. 2015;
6. Lutete P, Matthews DW, Sabounchi NS, et al. Intersectional Stigma and Prevention Among Gay, Bisexual, and Same Gender-Loving Men in New York City, 2020: System Dynamics Models. *American journal of public health*. 2022;112(S4):S444-S451.
7. Quinn K, Dickson-Gomez J, Zarwell M, Pearson B, Lewis M. "A gay man and a doctor are just like, a recipe for destruction": How racism and homonegativity in healthcare settings influence PrEP uptake among young Black MSM. *AIDS and Behavior*. 2019;23(7):1951-1963.
8. Arcaya MC, Tucker-Seeley RD, Kim R, Schnake-Mahl A, So M, Subramanian S. Research on neighborhood effects on health in the United States: a systematic review of study characteristics. *Social Science & Medicine*. 2016;168:16-29.
9. Duncan DT, Kawachi I. *Neighborhoods and health*. vol 10. Oxford University Press New York; 2018.
10. Rifkin SB. Examining the links between community participation and health outcomes: a review of the literature. *Health policy and planning*. 2014;29(suppl\_2):ii98-ii106.
11. Gesler WM. Therapeutic landscapes: medical issues in light of the new cultural geography. *Social science & medicine*. 1992;34(7):735-746.
12. Keene DE, Padilla MB. Spatial stigma and health inequality. *Critical public health*. 2014;24(4):392-404.
13. Duncan DT, Kawachi I, Subramanian S, Aldstadt J, Melly SJ, Williams DR. Examination of how neighborhood definition influences measurements of youths' access to tobacco retailers: a methodological note on spatial misclassification. *American journal of epidemiology*. 2014;179(3):373-381.
14. Palmer JR, Espenshade TJ, Bartumeus F, Chung CY, Ozgencil NE, Li K. New approaches to human mobility: Using mobile phones for demographic research. *Demography*. 2013;50(3):1105-1128.
15. Heron KE, Smyth JM. Ecological momentary interventions: incorporating mobile technology into psychosocial and health behaviour treatments. *British journal of health psychology*. 2010;15(1):1-39.
16. Wang L, Miller LC. Just-in-the-moment adaptive interventions (JITAI): A meta-analytical review. *Health Communication*. 2020;35(12):1531-1544.
17. Nahum-Shani I, Smith SN, Spring BJ, et al. Just-in-time adaptive interventions (JITAI) in mobile health: key components and design principles for ongoing health behavior support. *Annals of Behavioral Medicine*. 2018;52(6):446-462.

18. Nguyen KT, Olgin JE, Pletcher MJ, et al. Smartphone-based geofencing to ascertain hospitalizations. *Circulation: Cardiovascular Quality and Outcomes*. 2017;10(3):e003326.
19. Ahmed N, Michelin RA, Xue W, et al. A survey of COVID-19 contact tracing apps. *IEEE access*. 2020;8:134577-134601.
20. Carpenter SM, Menictas M, Nahum-Shani I, Wetter DW, Murphy SA. Developments in mobile health just-in-time adaptive interventions for addiction science. *Current addiction reports*. 2020;7(3):280-290.
21. Naughton F. Delivering “Just-In-Time” smoking cessation support via mobile phones: current knowledge and future directions. *Nicotine & Tobacco Research*. 2017;19(3):379-383.
22. Thomas JG, Bond DS. Review of innovations in digital health technology to promote weight control. *Current diabetes reports*. 2014;14(5):1-10.
23. Besoain F, Perez-Navarro A, Aviñó CJ, Caylà JA, Barriga NA, de Olalla PG. Prevention of HIV and other sexually transmitted infections by geofencing and contextualized messages with a gamified app, UBESAFE: design and creation study. *JMIR mHealth and uHealth*. 2020;8(3):e14568.
24. Bandura A. Social cognitive theory: An agentic perspective. *Asian journal of social psychology*. 1999;2(1):21-41.
25. Turan B, Hatcher AM, Weiser SD, Johnson MO, Rice WS, Turan JM. Framing mechanisms linking HIV-related stigma, adherence to treatment, and health outcomes. *American journal of public health*. 2017;107(6):863-869.
26. Macintyre S, Ellaway A, Cummins S. Place effects on health: how can we conceptualise, operationalise and measure them? *Social science & medicine*. 2002;55(1):125-139.
27. Khawcharoenporn T, Mongkolkaewsub S, Najjitra C, Khonphiern W, Apisarnthanarak A, Phanuphak N. HIV risk, risk perception and uptake of HIV testing and counseling among youth men who have sex with men attending a gay sauna. *AIDS research and therapy*. 2019;16(1):1-11.
28. Machowska A, Bamboria BL, Bercan C, Sharma M. Impact of ‘HIV-related stigma-reduction workshops’ on knowledge and attitude of healthcare providers and students in Central India: a pre-test and post-test intervention study. *BMJ open*. 2020;10(4):e033612.
29. Mi T, Li X, Zhou G, Qiao S, Shen Z, Zhou Y. HIV disclosure to family members and medication adherence: role of social support and self-efficacy. *AIDS and Behavior*. 2020;24(1):45-54.
30. SeyedAlinaghi S, MohsseniPour M, Aghaei E, Zarani F, Fathabadi J, Mohammadifirouzeh M. The Relationships Between Early Maladaptive Schemas, Quality of Life and Self-care Behaviors in a Sample of Persons Living with HIV: The Potential Mediating Role of Cognitive Emotion Regulation Strategies. *The Open AIDS Journal*. 2020;14(1)
31. Steptoe A, Jackson SE. The life skills of older Americans: association with economic, psychological, social, and health outcomes. *Scientific Reports*. 2018;8(1):1-10.
32. Yigit I, Bayramoglu Y, Weiser SD, et al. Changes in internalized stigma and HIV health outcomes in individuals new to HIV care: The mediating roles of depression and treatment self-efficacy. *AIDS Patient Care and STDs*. 2020;34(11):491-497.
33. Gonzalez A, Barinas J, O’Cleirigh C. Substance use: impact on adherence and HIV medical treatment. *Current HIV/AIDS Reports*. 2011;8(4):223-234.
34. Logie CH, Williams CC, Wang Y, et al. Adapting stigma mechanism frameworks to explore complex pathways between intersectional stigma and HIV-related health outcomes among women living with HIV in Canada. *Soc Sci Med*. 2019;232:129-38.

35. Safren SA, Blashill AJ, Lee JS, et al. Condom-use self-efficacy as a mediator between syndemics and condomless sex in men who have sex with men (MSM). *Health psychology*. 2018;37(9):820.
36. Weinstein ER, Harkness A, Ironson G, Shrader C-H, Duncan DT, Safren SA. Life instability associated with lower ART adherence and other poor HIV-related care outcomes in older adults with HIV. *International journal of behavioral medicine*. 2022:1-11.
37. Bekele T, Rourke SB, Tucker R, et al. Direct and indirect effects of perceived social support on health-related quality of life in persons living with HIV/AIDS. *AIDS care*. 2013;25(3):337-346.
38. Koegler E, Kennedy CE. A scoping review of the associations between mental health and factors related to HIV acquisition and disease progression in conflict-affected populations. *Conflict and health*. 2018;12(1):1-22.
39. Vaughan E, Power M, Sixsmith J. Experiences of stigma in healthcare settings by people living with HIV in Ireland: a qualitative study. *AIDS care*. 2020;32(9):1162-1167.
40. Tricco AC, Lillie E, Zarin W, et al. PRISMA extension for scoping reviews (PRISMA-ScR): checklist and explanation. *Annals of internal medicine*. 2018;169(7):467-473.
41. Agarwal S, LeFevre AE, Lee J, et al. Guidelines for reporting of health interventions using mobile phones: mobile health (mHealth) evidence reporting and assessment (mERA) checklist. *bmj*. 2016;352
42. Wright WG, Rafferty AP, Winterbauer N, Locklear K, Tucker-McLaughlin M. Geofencing: Mobile Technology as a Health Promotion Tool to Raise Awareness of a Dental Clinic in Rural North Carolina. *The Journal of Rural Health*. 2021;37(3):667-674.
43. Naughton F, Hopewell S, Lathia N, et al. A context-sensing mobile phone app (Q sense) for smoking cessation: a mixed-methods study. *JMIR mHealth and uHealth*. 2016;4(3):e5787.
44. DeFilippis EM, Safavi K, Reyes J, Coakley L, Hickey M, Givertz MM. Mobile Geolocation Technology to Improve Multidisciplinary Care of Patients with Ventricular Assist Devices: A Feasibility Study. *Journal of Cardiac Failure*. 2017;23(8):S84.
45. Owei L, Luks VL, Brooks KD, Kelz RR, Berns JS, Aarons CB. Smart-phone Based Geofencing: A Novel Approach to Monitoring Clinical Work Hours in Surgery Residency. *Journal of Surgical Education*. 2021;78(6):e210-e217.
46. Connor CW, Herzog M. Monitoring the location of staff via mobile devices in a large multifacility practice group. *A & A case reports*. 2016;6(10):320-328.
47. Gustafson DH, McTavish FM, Chih M-Y, et al. A smartphone application to support recovery from alcoholism: a randomized clinical trial. *JAMA psychiatry*. 2014;71(5):566-572.
48. Dorsch MP, Cornellier ML, Poggi AD, et al. Effects of a novel contextual just-in-time mobile app intervention (LowSalt4Life) on sodium intake in adults with hypertension: pilot randomized controlled trial. *JMIR mHealth and uHealth*. 2020;8(8):e16696.
49. Wray TB, Pérez AE, Celio MA, Carr DJ, Adia AC, Monti PM. Exploring the Use of Smartphone Geofencing to Study Characteristics of Alcohol Drinking Locations in High-Risk Gay and Bisexual Men. *Alcoholism: clinical and experimental research*. 2019;43(5):900-906.
50. Latkin CA, Hua W, Tobin K. Social network correlates of self-reported non-fatal overdose. *Drug and Alcohol Dependence*. 2004;73(1):61-67.
51. Tobin KE, Davey MA, Latkin CA. Calling emergency medical services during drug overdose: an examination of individual, social and setting correlates. *Addiction*. 2005;100(3):397-404.

- 1  
2  
3 52. Tobin KE, Latkin CA. Social networks of HIV positive gay men: their role and  
4 importance in HIV prevention. *Understanding Prevention for HIV Positive Gay Men*. Springer;  
5 2017:349-366.  
6  
7 53. Tobin KE, Heidari O, Winiker A, et al. Peer Approaches to Improve HIV Care Cascade  
8 Outcomes: a Scoping Review Focused on Peer Behavioral Mechanisms. *Current HIV/AIDS*  
9 *Reports*. 2022:1-14.  
10  
11  
12  
13  
14  
15  
16  
17  
18  
19  
20  
21  
22  
23  
24  
25  
26  
27  
28  
29  
30  
31  
32  
33  
34  
35  
36  
37  
38  
39  
40  
41  
42  
43  
44  
45  
46  
47  
48  
49  
50  
51  
52  
53  
54  
55  
56  
57  
58  
59  
60

For peer review only

Figure 1. Types of mechanisms of action, protective and risk factors as well as spatial scales in geofencing interventions in population health research.

| <b>Mechanisms of Action</b> | <b>Protective</b>                 | <b>Risk</b>                                           | <b>Spatial Scales</b>                         |
|-----------------------------|-----------------------------------|-------------------------------------------------------|-----------------------------------------------|
| Cognitive                   | Sense of control<br>Self-efficacy | Internalized & anticipated stigma<br>Risk perceptions | Room<br>Home<br>Block<br>Neighborhood<br>City |
| Behavioral                  | Adaptive Coping<br>Self-care      | Substance use<br>Non-adherence to medication          | County<br>State<br>Region                     |
| Social                      | Instrumental & Emotional support  | Enacted stigma<br>Conflict                            | Nation<br>Globe                               |



1  
2  
3  
4  
5  
6  
7  
8  
9  
10  
11  
12  
13  
14  
15  
16  
17  
18  
19  
20  
21  
22  
23  
24  
25  
26  
27  
28  
29  
30  
31  
32  
33  
34  
35  
36  
37  
38  
39  
40  
41  
42  
43  
44  
45  
46  
47

| Table 1. Details of nine studies that met inclusion criteria for the scoping review |                                                                                                                                                                                                                                                                                                                                                                                                                                                                                                                                                                                                                                                                                                 |                                                                                                                                                                                                                                                                                                       |                                                                                                                                                                                                                                                                                                                              |                                                                                                                                                                                                                    |
|-------------------------------------------------------------------------------------|-------------------------------------------------------------------------------------------------------------------------------------------------------------------------------------------------------------------------------------------------------------------------------------------------------------------------------------------------------------------------------------------------------------------------------------------------------------------------------------------------------------------------------------------------------------------------------------------------------------------------------------------------------------------------------------------------|-------------------------------------------------------------------------------------------------------------------------------------------------------------------------------------------------------------------------------------------------------------------------------------------------------|------------------------------------------------------------------------------------------------------------------------------------------------------------------------------------------------------------------------------------------------------------------------------------------------------------------------------|--------------------------------------------------------------------------------------------------------------------------------------------------------------------------------------------------------------------|
| Name/citation<br>Geofenced<br>intervention<br>Refernce<br>number                    | Study characteristics                                                                                                                                                                                                                                                                                                                                                                                                                                                                                                                                                                                                                                                                           | Development of<br>geofence                                                                                                                                                                                                                                                                            | Results                                                                                                                                                                                                                                                                                                                      | Theory and<br>framework                                                                                                                                                                                            |
| Wright et al.,<br>2021<br><br>Vendor not<br>cited<br><br>41                         | <p><i>Study purpose:</i> Increase awareness and use of dental services in a rural clinic</p> <p><i>Study design:</i> Pre and post intervention community and outcome assessments</p> <p><i>Target population:</i> Residents of a rural zip code surrounding a dental clinic</p> <p><i>Sample size:</i> 516,073 impressions delivered to individuals crossing the geofence</p> <p><i>Duration of follow-up:</i> Impressions were sent over a 60-day period</p> <p><i>Outcome of interest:</i> Number of impressions displayed to a user, clicks on the banner, click-through rates on the dental website from the banner, and pre/post intervention community knowledge of the dental clinic</p> | <p><i>User input:</i> None</p> <p><i>Mechanism of delivery:</i> Any individual with a smartphone physically located within the boundaries of three zip codes near the dental clinic received a geofence message advertising the dental clinic with webpage information for additional information</p> | <p>Over 60 days, 516,073 impressions were delivered, with 475 individuals clicks on the banner to get website information, and a click through rate of 0.09%.</p> <p>Increases were seen in community knowledge about the clinic (p=0.045) and dental visits by respondent or a family member (p=0.04) post intervention</p> | <p><i>Theoretical framework:</i> Anderson Model of Health Services Use</p> <p><i>Behavioral</i></p> <p><i>Social:</i> Informational support of an existing service that is place-based</p> <p><i>Cognitive</i></p> |

|                                                        |                                                                                                                                                                                                                                                                                                                                                                                                                                                                                                                                                                                                                                                                                                              |                                                                                                                                                                                                                                                                          |                                                                                                                                                                                                                                                                                                                                                                                                            |                                                                                                                                                                                    |
|--------------------------------------------------------|--------------------------------------------------------------------------------------------------------------------------------------------------------------------------------------------------------------------------------------------------------------------------------------------------------------------------------------------------------------------------------------------------------------------------------------------------------------------------------------------------------------------------------------------------------------------------------------------------------------------------------------------------------------------------------------------------------------|--------------------------------------------------------------------------------------------------------------------------------------------------------------------------------------------------------------------------------------------------------------------------|------------------------------------------------------------------------------------------------------------------------------------------------------------------------------------------------------------------------------------------------------------------------------------------------------------------------------------------------------------------------------------------------------------|------------------------------------------------------------------------------------------------------------------------------------------------------------------------------------|
| <p>Owei et al., 2021</p> <p>ResQ</p> <p>44</p>         | <p><i>Study purpose:</i> Assess the impact of the ResQ geofencing app on submission rates for duty hours and number of violations reported</p> <p><i>Study design:</i> Mixed methods feasibility and acceptability of the ResQ app.</p> <p><i>Target population:</i> Residents from the General Surgery Residency Program</p> <p><i>Sample size:</i> 23</p> <p><i>Duration of follow-up:</i> 60 days</p> <p><i>Outcome of interest:</i> Comparison of reported and recorded work hours submitted and work hour violations (80 hours per week and continuous hours worked). Additionally, 13 participants participated in semi-structured interviews to understand acceptability and feasibility of ResQ.</p> | <p><i>User input:</i> None</p> <p><i>Mechanism of delivery:</i> Geofences were placed around clinical sites where residents worked. The ResQ application was installed on resident's work phones and recorded work hours based on entering and exiting the geofence.</p> | <p>The mean number of violations decreased significantly (<math>p=0.04</math>) and work hour submissions did not differ with the intervention (<math>p=0.42</math>). Compared to the previous year, reported violations significantly decreased (<math>p&lt;0.01</math>).</p> <p>Participants found the application useful for recording and reporting clinical hours and eased administrative burden.</p> | <p><i>Theoretical framework:</i> None listed</p> <p><i>Behavioral</i></p> <p><i>Social</i></p> <p><i>Cognitive:</i> Sense of safety in capture and reporting of clinical hours</p> |
| <p>Gustafson et al., 2014</p> <p>A-CHESS</p> <p>46</p> | <p><i>Study purpose:</i> Determine if a smartphone application to support recovery from alcohol use disorders reduced risky drinking days.</p> <p><i>Study design:</i> Unmasked randomized clinical trial</p>                                                                                                                                                                                                                                                                                                                                                                                                                                                                                                | <p><i>User input:</i> High-risk locations were identified by participants</p> <p><i>Mechanism of delivery:</i> Study team geofenced user</p>                                                                                                                             | <p>Along with the geofenced intervention, A-CHESS was a mobile application that provided monitoring, information, communication, and support services from counselors. Overall the A-</p>                                                                                                                                                                                                                  | <p><i>Theoretical framework:</i> Self-determination theory</p> <p><i>Behavioral:</i> Warning messages sent in risky areas</p>                                                      |

1  
2  
3  
4  
5  
6  
7  
8  
9  
10  
11  
12  
13  
14  
15  
16  
17  
18  
19  
20  
21  
22  
23  
24  
25  
26  
27  
28  
29  
30  
31  
32  
33  
34  
35  
36  
37  
38  
39  
40  
41  
42  
43  
44  
45  
46  
47

|                                                       |                                                                                                                                                                                                                                                                                                                                                                                                                                                                                                                              |                                                                                                                                                                                                                                                                      |                                                                                                                                                                                                                                                                                                                                                                                                                                   |                                                                                                                                                                                         |
|-------------------------------------------------------|------------------------------------------------------------------------------------------------------------------------------------------------------------------------------------------------------------------------------------------------------------------------------------------------------------------------------------------------------------------------------------------------------------------------------------------------------------------------------------------------------------------------------|----------------------------------------------------------------------------------------------------------------------------------------------------------------------------------------------------------------------------------------------------------------------|-----------------------------------------------------------------------------------------------------------------------------------------------------------------------------------------------------------------------------------------------------------------------------------------------------------------------------------------------------------------------------------------------------------------------------------|-----------------------------------------------------------------------------------------------------------------------------------------------------------------------------------------|
|                                                       | <p><i>Target population:</i> People with diagnosed alcohol dependence discharged from residential treatment</p> <p><i>Sample size:</i> 349</p> <p><i>Duration of follow-up:</i> 8 months</p> <p><i>Outcome of interest:</i> Risky drinking days in the previous 30 days</p>                                                                                                                                                                                                                                                  | <p>identified high-risk locations and sent alerts to the user’s smartphone asking if they wanted to be there</p>                                                                                                                                                     | <p>CHES group reported fewer risky drinking days at follow-up (p=0.003)</p>                                                                                                                                                                                                                                                                                                                                                       | <p><i>Social:</i> Informational support with counselors</p> <p><i>Cognitive:</i> Passive and real-time capture of information shared with counselors</p>                                |
| <p>Nguyen et al., 2017</p> <p>Ginger.io</p> <p>18</p> | <p><i>Study purpose:</i> Evaluate the use of smartphone-based geofencing for tracking hospitalizations</p> <p><i>Study design:</i> Remote and in-person arm validation of a mobile application that detected hospitalizations and length of hospitalization</p> <p><i>Target population:</i> Remote- participants from the Health eHeart study with a smartphone<br/>In-person- Patients scheduled for electrophysiology and cardiac catheterization procedures.</p> <p><i>Sample size:</i> Remote- 3,443; In person- 22</p> | <p><i>User input:</i> None</p> <p><i>Mechanism of delivery:</i> The app was programmed with all U.S. hospitals geofenced. A notification was sent to within 1 hour of leaving the hospital vicinity asking participants to confirm if they received medical care</p> | <p>Remote- The application detected 800 unique participants in a geofenced location with a positive predictive value between 65-78% based on how hospitalization was confirmed. Most common error in detection was the participant was a medical center employee.</p> <p>In person- Visits were detected in 17/22 with confirmed hospitalization. Mean visit duration was not correlated with actual hospital length of stay.</p> | <p><i>Theoretical framework:</i> None listed</p> <p><i>Behavioral</i></p> <p><i>Social</i></p> <p><i>Cognitive:</i> Sense of safety in provider knowing your hospitalization status</p> |

|                                                       |                                                                                                                                                                                                                                                                                                                                                                                                                                                                                                                                                                                                                                                                                              |                                                                                                                                                                                                                                                                                                                                                                            |                                                                                                                                                                                                                                                                                                                                                                                                                                                                                                                                                                    |                                                                                                                                                                                                                          |
|-------------------------------------------------------|----------------------------------------------------------------------------------------------------------------------------------------------------------------------------------------------------------------------------------------------------------------------------------------------------------------------------------------------------------------------------------------------------------------------------------------------------------------------------------------------------------------------------------------------------------------------------------------------------------------------------------------------------------------------------------------------|----------------------------------------------------------------------------------------------------------------------------------------------------------------------------------------------------------------------------------------------------------------------------------------------------------------------------------------------------------------------------|--------------------------------------------------------------------------------------------------------------------------------------------------------------------------------------------------------------------------------------------------------------------------------------------------------------------------------------------------------------------------------------------------------------------------------------------------------------------------------------------------------------------------------------------------------------------|--------------------------------------------------------------------------------------------------------------------------------------------------------------------------------------------------------------------------|
|                                                       | <p><i>Duration of follow-up:</i> Remote- mean of 260 days; In person- Duration of their scheduled procedure</p> <p><i>Outcome of interest:</i> Detection of hospitalization</p>                                                                                                                                                                                                                                                                                                                                                                                                                                                                                                              |                                                                                                                                                                                                                                                                                                                                                                            |                                                                                                                                                                                                                                                                                                                                                                                                                                                                                                                                                                    |                                                                                                                                                                                                                          |
| <p>Naughton et al., 2016</p> <p>Q Sense</p> <p>20</p> | <p><i>Study purpose:</i> Feasibility and acceptability of a mobile application using geofencing to deliver tailored place-based intervention messages</p> <p><i>Study design:</i> Explanatory sequential mixed methods</p> <p><i>Target population:</i> Tobacco smokers willing to set a quit date within 1 month</p> <p><i>Sample size:</i> 15 in quantitative arm and 13 qualitative interviews</p> <p><i>Duration of follow-up:</i> Pre-quit period (up to 1 month) and 2 weeks post-quit date</p> <p><i>Outcome of interest:</i> 1) User engagement with app; 2) Assess app's location-sensing accuracy; 3) Feasibility of geofence mechanism; 4) Limitations of everyday use of app</p> | <p><i>User input:</i><br/>Geofences based on user habits and reports of smoking locations</p> <p><i>Mechanism of delivery:</i> If a smoker reported smoking in the same proximity, the device created a geofence around that area with a radius of 100m. When a user entered the geofence for greater than 5 minutes a location-tailored support message was triggered</p> | <p>User engagement with the application varied from 60% of days pre-quit and 39% post-quit (52% excluding outliers).</p> <p>Geolocation was collected on 97% of smoking reports with high accuracy. A mean of 1.5 geofences were created per participant with 87% having at least one. 5/9 participants eligible to receive a geofenced triggered message received at least one.</p> <p>Environmental constraints and forgetfulness were common reasons for forgetting to engage with app. Participants were positive about the value of the geofenced support</p> | <p><i>Theoretical framework:</i><br/>Learning theory and taxonomy of smoking behavior change</p> <p><i>Behavioral:</i> Coping and resilience regarding smoking triggers</p> <p><i>Social</i></p> <p><i>Cognitive</i></p> |

1  
2  
3  
4  
5  
6  
7  
8  
9  
10  
11  
12  
13  
14  
15  
16  
17  
18  
19  
20  
21  
22  
23  
24  
25  
26  
27  
28  
29  
30  
31  
32  
33  
34  
35  
36  
37  
38  
39  
40  
41  
42  
43  
44  
45  
46  
47

|                                                          |                                                                                                                                                                                                                                                                                                                                                                                                                                                                                                                                          |                                                                                                                                                                                                                                                                                                                                                                           |                                                                                                                                                                                                                                                                                                                 |                                                                                                                                                                                                                                                                                                                                        |
|----------------------------------------------------------|------------------------------------------------------------------------------------------------------------------------------------------------------------------------------------------------------------------------------------------------------------------------------------------------------------------------------------------------------------------------------------------------------------------------------------------------------------------------------------------------------------------------------------------|---------------------------------------------------------------------------------------------------------------------------------------------------------------------------------------------------------------------------------------------------------------------------------------------------------------------------------------------------------------------------|-----------------------------------------------------------------------------------------------------------------------------------------------------------------------------------------------------------------------------------------------------------------------------------------------------------------|----------------------------------------------------------------------------------------------------------------------------------------------------------------------------------------------------------------------------------------------------------------------------------------------------------------------------------------|
|                                                          |                                                                                                                                                                                                                                                                                                                                                                                                                                                                                                                                          |                                                                                                                                                                                                                                                                                                                                                                           | and had no privacy concerns.                                                                                                                                                                                                                                                                                    |                                                                                                                                                                                                                                                                                                                                        |
| Dorsch et al., 2020<br><br>LowSalt4Life<br><br>47        | <p><i>Study purpose:</i> Effectiveness of the LowSalt4Life mobile app on maintaining a low sodium diet and controlling blood pressure</p> <p><i>Study design:</i> Unblinded randomized control trial</p> <p><i>Target population:</i> Adults diagnosed with hypertension and taking antihypertensive medication</p> <p><i>Sample size:</i> 50 randomized</p> <p><i>Duration of follow-up:</i> 8 weeks</p> <p><i>Outcome of interest:</i> Changes in 24-hour dietary recall and sodium intake, urine sodium excretion, blood pressure</p> | <p><i>User input:</i> Mixed. Geofences were created based on user input as well as from a predictive service when a participant entered a grocery store, restaurant, or home.</p> <p><i>Mechanism of delivery:</i> Contextual adaptive messages were sent to participant's phones when entering a geofence, with messages linked to content in the mobile application</p> | <p>There was a significant decrease in sodium excretion (p=0.03) and decrease in sodium intake via 24 hour dietary recall (p=0.01) and in the App group vs no App groups. Blood pressure decreased by 1.7 mmHg in the App group compared to 0.7 in the no App, but the change was not significant (p=0.12).</p> | <p><i>Theoretical framework:</i> Theory of Planned Behavior</p> <p><i>Behavioral:</i> Dietary messages sent when participant is in areas where they would purchase/consume food</p> <p><i>Social:</i> Informational support regarding which products and food choices had lower sodium in context of place</p> <p><i>Cognitive</i></p> |
| DeFilippis et al., 2017<br><br>Position Health<br><br>43 | <p><i>Study purpose:</i> Determine the feasibility of patients with ventricular assist devices care engagement with and feasibility of a geofencing notification system.</p> <p><i>Study design:</i> Feasibility study with quantitative and qualitative measures</p>                                                                                                                                                                                                                                                                    | <p><i>User input:</i> None</p> <p><i>Mechanism of delivery:</i> Geofences were drawn around emergency departments (ED)</p>                                                                                                                                                                                                                                                | <p>The system was active on 4 occasions, each of which the participant confirmed they were at or near the hospital but were not seeking care. 1 patient</p>                                                                                                                                                     | <p><i>Theoretical framework:</i> None listed</p> <p><i>Behavioral</i></p> <p><i>Social</i></p>                                                                                                                                                                                                                                         |

|                                                         |                                                                                                                                                                                                                                                                                                             |                                                                                                                                                                                                                                                                                                                                                                                                            |                                                                                                                                                                                                                     |                                                                                                                                                                        |
|---------------------------------------------------------|-------------------------------------------------------------------------------------------------------------------------------------------------------------------------------------------------------------------------------------------------------------------------------------------------------------|------------------------------------------------------------------------------------------------------------------------------------------------------------------------------------------------------------------------------------------------------------------------------------------------------------------------------------------------------------------------------------------------------------|---------------------------------------------------------------------------------------------------------------------------------------------------------------------------------------------------------------------|------------------------------------------------------------------------------------------------------------------------------------------------------------------------|
|                                                         | <p><i>Target population:</i> Adults with a ventricular assist device (VAD)</p> <p><i>Sample size:</i> 21</p> <p><i>Duration of follow-up:</i> 6 months</p> <p><i>Outcome of interest:</i> Proper detection of emergency department utilization by participant and satisfaction with mobile application.</p> | <p>across the U.S. Once the application detected that a participant approached an ED, a prompt was sent to their phone to confirm if they were seeking care at that hospital. If yes, another prompt asked the participant to confirm if the app could notify their VAD healthcare team. If 'yes' to both, a notification was sent to the covering provider's pager with participant name and contact.</p> | <p>reported seeking ED care but did not receive a ping.</p> <p>Most patients responded favorable to their impression of the application stating that it "gave them peace of mind."</p>                              | <p><i>Cognitive:</i> Sense of safety to participants that emergency room and hospitalizations could alert their VAD provider regarding the need to coordinate care</p> |
| <p>Connor &amp; Herzig, 2016</p> <p>Stat!</p> <p>45</p> | <p><i>Study purpose:</i> Determine the feasibility and acceptability of a mobile application that allow automatic capture of work hours without manual employee input</p> <p><i>Study design:</i> Feasibility study</p>                                                                                     | <p><i>User input:</i> None</p> <p><i>Mechanism of delivery:</i> Geofences were drawn around hospitals where the anesthesia group provided services.</p>                                                                                                                                                                                                                                                    | <p>Use of the geofencing application showed a significant correlation of early departures following late departures the previous day (<math>p &lt; 0.01</math> in 73 of 91 occasions), and better dispersion of</p> | <p><i>Theoretical framework:</i> None listed</p> <p><i>Behavioral</i></p> <p><i>Social</i></p>                                                                         |

1  
2  
3  
4  
5  
6  
7  
8  
9  
10  
11  
12  
13  
14  
15  
16  
17  
18  
19  
20  
21  
22  
23  
24  
25  
26  
27  
28  
29  
30  
31  
32  
33  
34  
35  
36  
37  
38  
39  
40  
41  
42  
43  
44  
45  
46  
47

|                                                      |                                                                                                                                                                                                                                                                                                                                                                                                                                                                                                                                                          |                                                                                                                                                                                                                                                                                                                                |                                                                                                                                                                                                                                                                                                                                                                                                           |                                                                                                                                                                                                                                                                      |
|------------------------------------------------------|----------------------------------------------------------------------------------------------------------------------------------------------------------------------------------------------------------------------------------------------------------------------------------------------------------------------------------------------------------------------------------------------------------------------------------------------------------------------------------------------------------------------------------------------------------|--------------------------------------------------------------------------------------------------------------------------------------------------------------------------------------------------------------------------------------------------------------------------------------------------------------------------------|-----------------------------------------------------------------------------------------------------------------------------------------------------------------------------------------------------------------------------------------------------------------------------------------------------------------------------------------------------------------------------------------------------------|----------------------------------------------------------------------------------------------------------------------------------------------------------------------------------------------------------------------------------------------------------------------|
|                                                      | <p><i>Target population:</i> Anesthesia providers in a private practice group</p> <p><i>Sample size:</i> 198</p> <p><i>Duration of follow-up:</i> 12 months</p> <p><i>Outcome of interest:</i> Equitable workload distribution, employee acceptance and uptake, and reduced dispersion of the amount of overtime worked by staff</p>                                                                                                                                                                                                                     | <p>When the provider enters a geofence, their time at the facility is continuously checked and reported to a central server. Reports were then used to inform future clinical responsibilities and overtime worked</p>                                                                                                         | <p>working hours (p=0.002) compared to the previous year.</p> <p>Acceptance of the mobile application was slow to start but &gt;95% in less than 1 year of roll out</p>                                                                                                                                                                                                                                   | <p><i>Cognitive:</i> Sense of security regarding equitable distribution of work based on geofenced data and capture of time working for billing purposes</p>                                                                                                         |
| <p>Besoain et al., 2020</p> <p>UBESafe</p> <p>22</p> | <p><i>Study purpose:</i> Prevent sexually transmitted infections (STIs) by sending preventive measures in risky situations</p> <p><i>Study design:</i> Development and feasibility</p> <p><i>Target population:</i> Men who have sex with men</p> <p><i>Sample size:</i> Development-5; Feasibility- 4</p> <p><i>Duration of follow-up:</i> Development- 2 weeks; Feasibility- 1 month</p> <p><i>Outcome of interest:</i> Development- functional testing to receive user feedback; Feasibility- try the UBESAFE system with all its functionalities</p> | <p><i>User input:</i> Mixed. Hot zones were created by a system administrator and with input from users</p> <p><i>Mechanism of delivery:</i> Geofenced hot zones are areas demines with a high probability for intercourse. When users enter a hot zone, a contextual message to prevent HIV and STIs, and promote testing</p> | <p>All users triggered a geofenced hotzone during the development phase, though this was not quantified further. Hot zones were seen as a necessary component from those testing in the development phase.</p> <p>In the feasibility phase, users tested and rated prevention messages as well as adding their own.</p> <p>Users also contributed to hot zones and tested existing ones, contributing</p> | <p><i>Theoretical framework:</i> Elaboration likelihood model</p> <p><i>Behavioral:</i> Contextual messages for sexual risk reduction sent in hot spots for high-risk intercourse</p> <p><i>Social:</i> Gamification of preventive messages and interaction with</p> |

|  |  |  |                                                              |                                                  |
|--|--|--|--------------------------------------------------------------|--------------------------------------------------|
|  |  |  | 65% of hot zones in the application at the end of the study. | others using the application<br><i>Cognitive</i> |
|--|--|--|--------------------------------------------------------------|--------------------------------------------------|

For peer review only



1  
2  
3  
4  
5  
6  
7  
8  
9  
10  
11  
12  
13  
14  
15  
16  
17  
18  
19  
20  
21  
22  
23  
24  
25  
26  
27  
28  
29  
30  
31  
32  
33  
34  
35  
36  
37  
38  
39  
40  
41  
42  
43  
44  
45  
46  
47  
48  
49  
50  
51  
52  
53  
54  
55  
56  
57  
58  
59  
60

For peer review only

Supplemental Table 2. **Components of mobile health evidence reporting and assessment.**

|                                                            | Wright et al., 2021 | Owei et al., 2021 | Gustafson et al., 2014 | Nguyen et al., 2017 | Naughton et al., 2016 | Dorsch et al., 2020 | DeFilippis et al., 2017 | Connor & Herzig, 2016 | Besoain et al., 2020 |
|------------------------------------------------------------|---------------------|-------------------|------------------------|---------------------|-----------------------|---------------------|-------------------------|-----------------------|----------------------|
| Infrastructure                                             |                     |                   |                        |                     |                       |                     |                         |                       |                      |
| Technology platform                                        |                     |                   |                        |                     |                       |                     |                         |                       |                      |
| Interpretability/Health information systems context        |                     |                   |                        |                     |                       |                     |                         |                       |                      |
| Intervention delivery                                      |                     |                   |                        |                     |                       |                     |                         |                       |                      |
| Intervention content                                       |                     |                   |                        |                     |                       |                     |                         |                       |                      |
| Usability/content testing                                  |                     |                   |                        |                     |                       |                     |                         |                       |                      |
| User feedback                                              |                     |                   |                        |                     |                       |                     |                         |                       |                      |
| Access of individual participants                          |                     |                   |                        |                     |                       |                     |                         |                       |                      |
| Cost assessment                                            |                     |                   |                        |                     |                       |                     |                         |                       |                      |
| Adoption inputs/program entry                              |                     |                   |                        |                     |                       |                     |                         |                       |                      |
| Limitations for delivery at scale                          |                     |                   |                        |                     |                       |                     |                         |                       |                      |
| Contextual adaptability                                    |                     |                   |                        |                     |                       |                     |                         |                       |                      |
| Replicability                                              |                     |                   |                        |                     |                       |                     |                         |                       |                      |
| Data security                                              |                     |                   |                        |                     |                       |                     |                         |                       |                      |
| Compliance with national guidelines or regulatory statutes |                     |                   |                        |                     |                       |                     |                         |                       |                      |

## Preferred Reporting Items for Systematic reviews and Meta-Analyses extension for Scoping Reviews (PRISMA-ScR) Checklist

| SECTION                                               | ITEM | PRISMA-ScR CHECKLIST ITEM                                                                                                                                                                                                                                                                                  | REPORTED ON PAGE # |
|-------------------------------------------------------|------|------------------------------------------------------------------------------------------------------------------------------------------------------------------------------------------------------------------------------------------------------------------------------------------------------------|--------------------|
| <b>TITLE</b>                                          |      |                                                                                                                                                                                                                                                                                                            |                    |
| Title                                                 | 1    | Identify the report as a scoping review.                                                                                                                                                                                                                                                                   |                    |
| <b>ABSTRACT</b>                                       |      |                                                                                                                                                                                                                                                                                                            |                    |
| Structured summary                                    | 2    | Provide a structured summary that includes (as applicable): background, objectives, eligibility criteria, sources of evidence, charting methods, results, and conclusions that relate to the review questions and objectives.                                                                              |                    |
| <b>INTRODUCTION</b>                                   |      |                                                                                                                                                                                                                                                                                                            |                    |
| Rationale                                             | 3    | Describe the rationale for the review in the context of what is already known. Explain why the review questions/objectives lend themselves to a scoping review approach.                                                                                                                                   |                    |
| Objectives                                            | 4    | Provide an explicit statement of the questions and objectives being addressed with reference to their key elements (e.g., population or participants, concepts, and context) or other relevant key elements used to conceptualize the review questions and/or objectives.                                  |                    |
| <b>METHODS</b>                                        |      |                                                                                                                                                                                                                                                                                                            |                    |
| Protocol and registration                             | 5    | Indicate whether a review protocol exists; state if and where it can be accessed (e.g., a Web address); and if available, provide registration information, including the registration number.                                                                                                             |                    |
| Eligibility criteria                                  | 6    | Specify characteristics of the sources of evidence used as eligibility criteria (e.g., years considered, language, and publication status), and provide a rationale.                                                                                                                                       |                    |
| Information sources*                                  | 7    | Describe all information sources in the search (e.g., databases with dates of coverage and contact with authors to identify additional sources), as well as the date the most recent search was executed.                                                                                                  |                    |
| Search                                                | 8    | Present the full electronic search strategy for at least 1 database, including any limits used, such that it could be repeated.                                                                                                                                                                            |                    |
| Selection of sources of evidence†                     | 9    | State the process for selecting sources of evidence (i.e., screening and eligibility) included in the scoping review.                                                                                                                                                                                      |                    |
| Data charting process‡                                | 10   | Describe the methods of charting data from the included sources of evidence (e.g., calibrated forms or forms that have been tested by the team before their use, and whether data charting was done independently or in duplicate) and any processes for obtaining and confirming data from investigators. |                    |
| Data items                                            | 11   | List and define all variables for which data were sought and any assumptions and simplifications made.                                                                                                                                                                                                     |                    |
| Critical appraisal of individual sources of evidence§ | 12   | If done, provide a rationale for conducting a critical appraisal of included sources of evidence; describe the methods used and how this information was used in any data synthesis (if appropriate).                                                                                                      |                    |
| Synthesis of results                                  | 13   | Describe the methods of handling and summarizing the data that were charted.                                                                                                                                                                                                                               |                    |

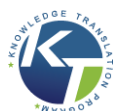

| SECTION                                       | ITEM | PRISMA-ScR CHECKLIST ITEM                                                                                                                                                                       | REPORTED ON PAGE # |
|-----------------------------------------------|------|-------------------------------------------------------------------------------------------------------------------------------------------------------------------------------------------------|--------------------|
| <b>RESULTS</b>                                |      |                                                                                                                                                                                                 |                    |
| Selection of sources of evidence              | 14   | Give numbers of sources of evidence screened, assessed for eligibility, and included in the review, with reasons for exclusions at each stage, ideally using a flow diagram.                    |                    |
| Characteristics of sources of evidence        | 15   | For each source of evidence, present characteristics for which data were charted and provide the citations.                                                                                     |                    |
| Critical appraisal within sources of evidence | 16   | If done, present data on critical appraisal of included sources of evidence (see item 12).                                                                                                      |                    |
| Results of individual sources of evidence     | 17   | For each included source of evidence, present the relevant data that were charted that relate to the review questions and objectives.                                                           |                    |
| Synthesis of results                          | 18   | Summarize and/or present the charting results as they relate to the review questions and objectives.                                                                                            |                    |
| <b>DISCUSSION</b>                             |      |                                                                                                                                                                                                 |                    |
| Summary of evidence                           | 19   | Summarize the main results (including an overview of concepts, themes, and types of evidence available), link to the review questions and objectives, and consider the relevance to key groups. |                    |
| Limitations                                   | 20   | Discuss the limitations of the scoping review process.                                                                                                                                          |                    |
| Conclusions                                   | 21   | Provide a general interpretation of the results with respect to the review questions and objectives, as well as potential implications and/or next steps.                                       |                    |
| <b>FUNDING</b>                                |      |                                                                                                                                                                                                 |                    |
| Funding                                       | 22   | Describe sources of funding for the included sources of evidence, as well as sources of funding for the scoping review. Describe the role of the funders of the scoping review.                 |                    |

JBI = Joanna Briggs Institute; PRISMA-ScR = Preferred Reporting Items for Systematic reviews and Meta-Analyses extension for Scoping Reviews.

\* Where *sources of evidence* (see second footnote) are compiled from, such as bibliographic databases, social media platforms, and Web sites.

† A more inclusive/heterogeneous term used to account for the different types of evidence or data sources (e.g., quantitative and/or qualitative research, expert opinion, and policy documents) that may be eligible in a scoping review as opposed to only studies. This is not to be confused with *information sources* (see first footnote).

‡ The frameworks by Arksey and O'Malley (6) and Levac and colleagues (7) and the JBI guidance (4, 5) refer to the process of data extraction in a scoping review as data charting.

§ The process of systematically examining research evidence to assess its validity, results, and relevance before using it to inform a decision. This term is used for items 12 and 19 instead of "risk of bias" (which is more applicable to systematic reviews of interventions) to include and acknowledge the various sources of evidence that may be used in a scoping review (e.g., quantitative and/or qualitative research, expert opinion, and policy document).

From: Tricco AC, Lillie E, Zarin W, O'Brien KK, Colquhoun H, Levac D, et al. PRISMA Extension for Scoping Reviews (PRISMA-ScR): Checklist and Explanation. *Ann Intern Med.* 2018;169:467–473. doi: [10.7326/M18-0850](https://doi.org/10.7326/M18-0850).

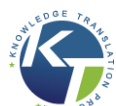

# BMJ Open

## Use of geofencing interventions in population health research: a scoping review

|                                 |                                                                                                                                                                                                                                                                                                                                                                                                                                                                                                                                               |
|---------------------------------|-----------------------------------------------------------------------------------------------------------------------------------------------------------------------------------------------------------------------------------------------------------------------------------------------------------------------------------------------------------------------------------------------------------------------------------------------------------------------------------------------------------------------------------------------|
| Journal:                        | <i>BMJ Open</i>                                                                                                                                                                                                                                                                                                                                                                                                                                                                                                                               |
| Manuscript ID                   | bmjopen-2022-069374.R2                                                                                                                                                                                                                                                                                                                                                                                                                                                                                                                        |
| Article Type:                   | Original research                                                                                                                                                                                                                                                                                                                                                                                                                                                                                                                             |
| Date Submitted by the Author:   | 14-Jul-2023                                                                                                                                                                                                                                                                                                                                                                                                                                                                                                                                   |
| Complete List of Authors:       | Tobin, Karin ; Johns Hopkins University Bloomberg School of Public Health, Health, Behavior and Society<br>Heidari, Omeid; University of Washington School of Nursing, Child, Family and Population Health Nursing<br>Volpi, Connor; Johns Hopkins University Bloomberg School of Public Health, Health, Behavior and Society<br>Sodder, Shereen; Johns Hopkins University Bloomberg School of Public Health, Health, Behavior and Society<br>Duncan, Dustin; Columbia University Mailman School of Public Health, Department of Epidemiology |
| <b>Primary Subject Heading</b>: | Public health                                                                                                                                                                                                                                                                                                                                                                                                                                                                                                                                 |
| Secondary Subject Heading:      | Mental health                                                                                                                                                                                                                                                                                                                                                                                                                                                                                                                                 |
| Keywords:                       | EPIDEMIOLOGY, HIV & AIDS < INFECTIOUS DISEASES, MENTAL HEALTH, PUBLIC HEALTH                                                                                                                                                                                                                                                                                                                                                                                                                                                                  |
|                                 |                                                                                                                                                                                                                                                                                                                                                                                                                                                                                                                                               |

SCHOLARONE™  
Manuscripts



I, the Submitting Author has the right to grant and does grant on behalf of all authors of the Work (as defined in the below author licence), an exclusive licence and/or a non-exclusive licence for contributions from authors who are: i) UK Crown employees; ii) where BMJ has agreed a CC-BY licence shall apply, and/or iii) in accordance with the terms applicable for US Federal Government officers or employees acting as part of their official duties; on a worldwide, perpetual, irrevocable, royalty-free basis to BMJ Publishing Group Ltd ("BMJ") its licensees and where the relevant Journal is co-owned by BMJ to the co-owners of the Journal, to publish the Work in this journal and any other BMJ products and to exploit all rights, as set out in our [licence](#).

The Submitting Author accepts and understands that any supply made under these terms is made by BMJ to the Submitting Author unless you are acting as an employee on behalf of your employer or a postgraduate student of an affiliated institution which is paying any applicable article publishing charge ("APC") for Open Access articles. Where the Submitting Author wishes to make the Work available on an Open Access basis (and intends to pay the relevant APC), the terms of reuse of such Open Access shall be governed by a Creative Commons licence – details of these licences and which [Creative Commons](#) licence will apply to this Work are set out in our licence referred to above.

Other than as permitted in any relevant BMJ Author's Self Archiving Policies, I confirm this Work has not been accepted for publication elsewhere, is not being considered for publication elsewhere and does not duplicate material already published. I confirm all authors consent to publication of this Work and authorise the granting of this licence.

## Use of geofencing interventions in population health research: a scoping review

Karin E. Tobin, PhD<sup>a\*</sup>

Omeid Heidari, PhD<sup>b\*</sup>

Connor Volpi, MPH<sup>a</sup>

Shereen Sodder, MSPH<sup>a</sup>

Dustin T. Duncan, ScD<sup>c</sup>

<sup>a</sup>Department of Health, Behavior and Society, John Hopkins University Bloomberg School of Public Health, Baltimore, MD, USA

<sup>b</sup>Department of Child, Family and Population Health Nursing, University of Washington, School of Nursing, Seattle, WA, USA

<sup>c</sup>Department of Epidemiology, Columbia University Mailman School of Public Health, New York, NY, USA

\*Co-first authors

### Correspondence to:

Karin Tobin

Department of Health, Behavior and Society, John Hopkins University Bloomberg School of Public Health, 2213 McElderry Street, 2nd Floor, Baltimore, Maryland 21205, USA

[ktobin2@jhu.edu](mailto:ktobin2@jhu.edu)

**Word count: 3261**

## Abstract

**Objectives:** Technological advancements that utilize global positioning system (GPS), such as geofencing, provide the opportunity to examine place-based context in population health research. This review aimed to systematically identify, assess, and synthesize the existing evidence on geofencing intervention design, acceptability, feasibility, and/or impact.

**Design:** Scoping review, using the PRISMA-ScR guidance for reporting.

**Data sources:** PubMed, CINAHL, EMBASE Web of Science, Cochrane, and PsychINFO for articles in English published up to December 31<sup>st</sup>, 2021.

**Eligibility criteria:** Articles were included if geofencing was utilized as a mechanism for intervention delivery. Exclusion criteria: 1) a component or combination of GPS, geographic information system (GIS), or ecological momentary assessment (EMA) was utilized without delivery of an intervention; 2) did not include a health or health-related outcome from the geofencing intervention; or 3) was not a peer-reviewed study.

**Data extraction and synthesis:** Several researchers independently reviewed all abstracts and full-text articles for final inclusion.

**Results:** A total of 2,171 articles were found; after exclusions, nine studies were included in the review. The majority were published in five years preceding the search (89%). Geofences in most studies (n=5) were fixed and programmed in the mobile application carried by participants without their input. Mechanisms of geofencing interventions were classified as direct or indirect, with five studies (56%) utilizing direct interventions. There were several different health outcomes (from smoking to problematic alcohol use) across the five studies that utilized a direct geofencing intervention.



1  
2  
3 **Conclusions:** This scoping review found geofencing to be an emerging technology that is an  
4 acceptable and feasible intervention applied to several different populations and health outcomes.  
5  
6 Future studies should specify the rationale for the locations that are geofenced and user input.  
7  
8 Moreover, attention to mechanisms of actions will enable scientists to understand not only  
9  
10 whether geofencing is an appropriate and effective intervention but why it works to achieve the  
11  
12 outcomes observed.  
13  
14  
15  
16  
17  
18

### 19 **Strengths and limitations of this study**

- 21 • The scoping review was comprehensive, utilizing rigorous searches of six databases.
- 22 • The review used the Preferred Reporting Items for Systematic Reviews and Meta-analyses  
23 extension for Scoping Reviews (PRISMA-ScR) checklist to guide reporting.
- 24 • Most of the eligible studies were conducted in the United States, limiting generalizability to  
25 other international settings.
- 26 • The review was conducted through the published literature through 2021 and therefore does  
27 not include more recent publications.
- 28  
29  
30  
31  
32  
33  
34  
35  
36  
37  
38  
39  
40  
41  
42  
43  
44  
45  
46  
47  
48  
49  
50  
51  
52  
53  
54  
55  
56  
57  
58  
59  
60

## Introduction

Population health outcomes and health disparities result from multi-level factors beyond the individual. For example, poverty can lead to a lack of access to healthy food<sup>1</sup> and medical care<sup>2</sup>; unstable housing can lead to inability to adhere to medications<sup>3</sup> and exposures to unhealthy environments;<sup>4</sup> homophobia and racism leads to stigma and discrimination, and mistrust and avoidance of medical systems.<sup>5-7</sup>

Often in behavioral research, theories or frameworks do not consider the place-based context of behavior despite literature on the consistent and enduring impact of places such as neighborhoods and communities on population health outcomes and disparities.<sup>8-10</sup> Place-based context can be conceptualized as both geographic areas defined by boundaries or as socially constructed out of symbolic meanings *and* social relations.<sup>11,12</sup> In both cases, place-based context operates to perpetuate hierarchical social structures, facilitate and constrain resources, and protect or hinder health. Moreover, place-based context may facilitate specific health-related interactions such as drug or alcohol use, experiences of violence, or engagement in healthcare. Yet behavioral interventions often conceptualize place-based context as static (e.g., place of risky sex) and do not consider how place-based contexts vary over time. Real-time geospatial methods, including the use of global positioning system (GPS) technology, are the cutting-edge, best-suited methods to overcome limitations of most neighborhoods and other environments health research because they better capture place-based contexts corresponding to individuals' lived experiences, referred to as "activity space".<sup>13</sup>

There are numerous types of GPS-based methods that collect data from individuals and in some cases deliver intervention content. For example, ecological momentary assessment (EMA) has been shown to be an acceptable method of data collection.<sup>14</sup> Ecological Momentary

1  
2  
3 Interventions (EMI) allow researchers to deliver intervention content through mobile devices.<sup>15</sup>  
4  
5 Just-in-time adaptive interventions (JITAI) attempt to address the changing needs of an  
6  
7 individual where the intervention algorithm is programmed to determine if and what intervention  
8  
9 content should be delivered to participants at set times throughout the day, whenever a  
10  
11 participant requests one, or based on the participant's current state (e.g., stress) or environmental  
12  
13 changes (e.g., weather).<sup>16-17</sup> Finally, geofences are virtual boundaries drawn around a location  
14  
15 and allow for monitoring and messaging when individuals enter or exits the geofenced  
16  
17 parameter.<sup>18</sup> Geofencing interventions are a subset of JITAI where there is continuous  
18  
19 monitoring of the participant's location using GPS and delivery of an intervention such as text  
20  
21 messages or links to health information or information about health services that are in the area  
22  
23 based on a spatial context trigger. A geofence involves creating virtual predefined set of  
24  
25 boundaries or "fences" around a geographic location, including using GPS technology.  
26  
27 Geofencing methodology can be used in public health research – both in observational and  
28  
29 intervention studies. Thus, geofencing can be a valuable tool in intervention research, enabling  
30  
31 researchers to study and implement interventions in specific geographic areas. For example,  
32  
33 geofencing allows researchers to precisely target specific areas for intervention. In addition,  
34  
35 geofencing allows researchers to send location-based notifications (an intervention) to  
36  
37 participants, including on their mobile devices. One example of this in the public health setting is  
38  
39 the use of geofencing to monitor movements of individuals who tested positive for COVID-19  
40  
41 virus.<sup>19</sup>  
42  
43  
44  
45  
46  
47  
48

49       Reviews of JITAI and EMI show the promising potential of this evolving technology,<sup>20-22</sup>  
50  
51 yet, such reviews are noted to lack the inclusion of geofencing, representing a major gap in the  
52  
53 literature. This gap is vital to address as geofencing has the capability to address an array of  
54  
55  
56  
57  
58  
59  
60

1  
2  
3 different health issues ranging from tobacco cessation to HIV medication adherence. The lack of  
4  
5 a clear and systematic understanding of the scope of geofencing interventions undermines its  
6  
7 potential to impact population health. The purpose of this scoping review is to describe of the  
8  
9 state of the evidence on geofencing intervention design, acceptability, feasibility, and impact. In  
10  
11 addition, we examine what behavioral mechanisms were targeted across the interventions  
12  
13  
14  
15 assessed.

### 19 *Conceptualizing mechanisms of action*

20  
21 Another limitation in the literature of EMA and JITAI interventions is the lack of attention to  
22  
23 specific mechanisms of action that operate to achieve outcomes.<sup>23</sup> Therefore, we sought to  
24  
25 develop a framework based on several complementary theories and frameworks (e.g., Turan's  
26  
27 HIV Stigma Framework and Social Cognitive Theory<sup>24-26</sup>) to evaluate geofencing interventions  
28  
29 included in this review. The framework posits three key mechanisms operate for place-based  
30  
31 context to influence health outcomes (Figure 1). Each mechanism has both a protective and risk  
32  
33 dimension. The Cognitive mechanism includes cognitive processes such as sense of control,  
34  
35 knowledge, attitudes, self-efficacy, maladaptive thoughts, risk perceptions and internalized  
36  
37 stigma.<sup>27-32</sup> The Behavioral mechanism refers to both protective behaviors such as adaptive  
38  
39 coping as well as risky behaviors such substance use, condomless sex and non-adherence to  
40  
41 medication and care.<sup>33-35</sup> The Social mechanism refers to interactions with others in the personal  
42  
43 social networks and broader community such as emotional or instrumental support or enacted  
44  
45 stigma and conflict which have been shown to exacerbate or mitigate health outcomes.<sup>36-38</sup> The  
46  
47 framework can be applied to multiple spatial scales from a micro-level (e.g. a room in one's  
48  
49  
50  
51  
52  
53  
54  
55  
56  
57  
58  
59  
60

1  
2  
3 residence) to community-level (e.g. a neighborhood activity space or census tract) to macro (e.g.  
4  
5 state, region).  
6  
7  
8  
9

## 10 **Methods**

### 11 *Study design*

12  
13  
14 This scoping review is reported in accordance with the Preferred Reporting Items for Systematic  
15  
16 Reviews and Meta-analyses (PRISMA) extension for Scoping Reviews checklist.<sup>39</sup>  
17  
18  
19  
20

### 21 *Inclusion criteria*

22  
23  
24 Articles were only included if they utilized geofencing as a mechanism for intervention delivery.  
25  
26 Articles were excluded if 1) a component or combination of GPS, geographic information system  
27  
28 (GIS), or ecological momentary assessment (EMA) was utilized without delivery of an  
29  
30 intervention; 2) did not include a health or health-related outcome from the geofencing  
31  
32 intervention; or 3) was not a peer-reviewed study.  
33  
34  
35  
36  
37

### 38 *Search strategy*

39  
40 Authors first met to develop the list of potential search terms and refined after initial searches  
41  
42 were conducted. Then searches were conducted in PubMed, CINAHL, EMBASE Web of  
43  
44 Science, Cochrane, and PsychINFO for articles published through the end of 2021 (Appendix 1,  
45  
46 detailed search strategy across n=6 databases). Search terms were for broad concepts regarding  
47  
48 mobile delivery of a geofencing intervention: “Geographic Information Systems”;  
49  
50 “Georeferencing”; “Global Positioning System”; or “Geofenc\*” combined with “Smartphone” or  
51  
52  
53  
54  
55  
56  
57  
58  
59  
60

1  
2  
3 “Mobile Applications.” The search was conducted on 12/1/2021 and was not registered. A  
4  
5 protocol was not prepared.  
6  
7  
8  
9

### 10 *Study selection*

11  
12 Screening of article titles and abstracts was conducted with two reviewers (SS, CV) to maximize  
13  
14 scrutiny of all records. Each reviewer independently screened all articles identified from the  
15  
16 initial search for relevance to the pre-defined inclusion criteria that was highlighted during a  
17  
18 training session where it was emphasized that the reviewers should apply a liberal approach.  
19  
20 Next, the same two reviewers independently reviewed each of the full texts for inclusion in the  
21  
22 data extraction phase. Any disagreements in both phases were adjudicated by a third reviewer  
23  
24 (OH). In all phases reviewers were not blinded to authors, funding, or information regarding  
25  
26 publication of all the records.  
27  
28  
29  
30  
31  
32

### 33 *Data extraction*

34  
35 Two reviewers (OH, KT) extracted data for details of study design, target population, sample  
36  
37 size, duration of follow-up, theoretical framework, software or mobile application use, goal, and  
38  
39 mechanism of geofenced intervention, and impact of the intervention of outcomes. Place-based  
40  
41 mechanisms associated with the intervention included: 1) Behavioral, 2) Social support:  
42  
43 Emotional, Instrumental, Informational, and Social monitoring, and 3) Cognitive. Finally,  
44  
45 established guidance for reporting health intervention using mobile phone was utilized to  
46  
47 evaluate the quality of each article.<sup>40</sup>  
48  
49  
50  
51  
52

### 53 *Patient and Public Involvement*

54  
55  
56 None.  
57  
58  
59  
60

## Results

### *Included studies*

Using the search strategy in six identified databases, a total of 2,171 articles were found after removing duplicates. 2,039 (94%) studies were irrelevant and 132 (6%) full text studies were assessed for eligibility. Reasons for exclusion of the 123 articles in the full-text phase included the article not being peer reviewed (n=46, 37%), review articles (n=19, 16%), was not the correct study design or intervention (n=14, 11%), or utilized a combination of GPS, GIS, and or Ecological Momentary Assessment, but was not a geofencing intervention (n=44, 36%). Nine eligible studies were ultimately included in this scoping review (Figure 2; Appendix 2, Details of nine studies that met inclusion for the scoping review).

### *Study characteristics*

The majority were published in five years preceding the search (n=8; 89%). Most employed a pre/post study design to assess changes in measured outcome or feasibility and acceptability of the geofencing intervention (n=7; 78%) with two unblinded randomized control trials. Sample sizes ranged from 4 to 3,443; one study's intervention quantified its reach with the geofencing intervention displaying on 516,073 mobile phones, though these impressions do not represent unique individuals receiving the intervention.<sup>41</sup> Most studies (n=7; 78%) were conducted in the United States, one in the United Kingdom<sup>42</sup> and one in Spain.<sup>23</sup> A description of studies, including the names of the mobile applications used, study design and characteristics, and place-based mechanisms are detailed in Appendix 2. The design of the geofencing interventions varied

1  
2  
3 based on user input and content delivery (Appendix 3, Components of mobile health evidence  
4 reporting and assessment).  
5  
6  
7  
8  
9

#### 10 *Geofencing methods: user input*

11  
12 Geofences in most studies (n=5) were fixed and programmed in the mobile application without  
13 participant input. These included hospital emergency departments,<sup>18,43</sup> hospitals where  
14 participants worked,<sup>44,45</sup> and a specific rural dental clinic.<sup>41</sup> Two studies utilized participants  
15 input in determining where to geofence related to smoking<sup>42</sup> or problematic alcohol use.<sup>46</sup> Two  
16 studies utilized a mix of fixed and user input. Dorsch et al. utilized user input to geofence  
17 locations where foods were consumed or purchased as well as a cloud-based web service to  
18 predict when participants entered grocery stores or restaurants. Besoain et al., used a moderated  
19 system where participants suggested locations to geofence that were venues for high-risk sexual  
20 encounters, but these venues were moderated by the study team and locations could be added or  
21 removed.  
22  
23  
24  
25  
26  
27  
28  
29  
30  
31  
32  
33  
34  
35  
36  
37

#### 38 *Intervention content delivery: direct versus indirect*

39  
40 Intervention content was delivered in direct or indirect methods. Five studies (56%) sent  
41 participants intervention content directly to their phones based on triggering the geofence  
42 boundary. These interventions included informing individuals living in a rural area of a dental  
43 clinic<sup>41</sup> or sending behavioral messages regarding problematic alcohol use when near a bar,<sup>46</sup>  
44 smoking cessation in areas detected as high likelihood of smoking,<sup>42</sup> making low-sodium diet  
45 choices in grocery stores, restaurants, or at home, or HIV and STI prevention messages when in  
46 venues associated with high-risk sexual activity.<sup>23</sup> The remaining 4 studies were categorized as  
47  
48  
49  
50  
51  
52  
53  
54  
55  
56  
57  
58  
59  
60



1  
2  
3 indirect as they collected data when participants triggered geofence boundaries and in some  
4  
5 cases delivered content at a later time from when the fence was triggered.  
6  
7  
8  
9

### 10 *Impact of the interventions*

11  
12 There was not a consistent health outcome across the five studies that utilized a direct  
13  
14 intervention. Both studies that utilized a randomized control design showed improved outcomes  
15  
16 in the group randomized to geofencing. A-CHESS sent context and place-based messages and  
17  
18 included multiple other services such as a phone and data plan, access to a virtual counselor, and  
19  
20 other interactive features.<sup>46</sup> LowSalt4Life contained features including low sodium options and  
21  
22 alternatives at grocery stores or restaurants, and the ability to scan product barcodes to find  
23  
24 similar low sodium options. Q Sense intervention participants decreased from 60% of pre-quit  
25  
26 smoking days to 39% post-quit. UBESafe intervention reported that all participants were able to  
27  
28 trigger a hot zone where sexual contacts often took place and received a place-based prevention  
29  
30 message.<sup>22</sup> Finally, Wright et al.,<sup>41</sup> used a pre/post design, and found increases in community  
31  
32 knowledge about the dental clinic ( $p=0.045$ ) and increased number of dental visits post  
33  
34 intervention.  
35  
36  
37  
38  
39  
40  
41  
42

### 43 *Indirect intervention outcomes*

44  
45 Two studies used the geofence to track time working from medical practitioners or surgical  
46  
47 residents. Owei et al., found the mean number of working hour violations for surgical residents'  
48  
49 post-intervention significantly decreased ( $p=0.04$ ) compared to pre-intervention and compared to  
50  
51 the previous year ( $p<0.01$ ).<sup>44</sup> Connor et al., showed a significant correlation of early departures  
52  
53 from operating room duties following late departures the previous day ( $p<0.01$ ) and better  
54  
55  
56  
57  
58  
59  
60

1  
2  
3 dispersion of working hours ( $p=0.002$ ) compared to the previous year.<sup>45</sup> Two other studies  
4  
5 geofenced major hospitals to detect hospitalization of high priority patients. Nguyen et al., found  
6  
7 the geofenced mobile application detected 800 unique participants who triggered a geofence,  
8  
9 with a predictive value of true hospitalization between 65-78%.<sup>18</sup> Similarly, from a sample size  
10  
11 of 21, 4 of the participants activated the alert system for patients with a ventricular assist device  
12  
13 to their on-call care team when they triggered an emergency room geofence.<sup>43</sup>  
14  
15  
16  
17  
18

### 19 *Acceptability measures*

20  
21 Five studies reported data regarding acceptability of the geofencing mobile application in which  
22  
23 all participants were positive regarding the value of the intervention. Participants in two studies  
24  
25 with indirect intervention found the application useful and described knowledge of being  
26  
27 monitored provided a sense of security.<sup>43,44</sup> Additionally, participants in two studies did not have  
28  
29 concerns regarding the continuous geolocation tracking for intervention purpose,<sup>42,44</sup> but did  
30  
31 stress the importance of transparency regarding the use of this data.<sup>42</sup> Finally, in one interactive  
32  
33 study, participants contributed to the creation and curation of geofenced hot zones as well as the  
34  
35 prevention messages received when hot zones were triggered, accounting for 67% of hot zones  
36  
37 created and used by the study.<sup>23</sup>  
38  
39  
40  
41  
42  
43

### 44 *Place-based mechanisms*

45  
46 Four studies utilized a behavioral mechanism in their geofencing intervention.<sup>23,42,46,47</sup> Four  
47  
48 studies utilized a social mechanism which included informational support such as existence of a  
49  
50 rural dental clinic<sup>41</sup> and availability of menu grocery store items that were low in sodium.<sup>23,41,46,47</sup>  
51  
52  
53 Additionally, participants were able to interact with counselors through the application and  
54  
55  
56  
57  
58  
59  
60

1  
2  
3 review their data concerning visiting high-risk locations for further intervention<sup>46</sup> or sharing  
4 context specific messages with other users on the application.<sup>23</sup> Finally, five studies utilized a  
5 cognitive mechanism that provided the participant a sense of safety, security, or knowing that  
6 their information was captured.<sup>45,46</sup> These included reporting to care teams when the participants  
7 were hospitalized,<sup>18,43</sup> capture of time and effort spent working in a clinical environment,<sup>44,45</sup> and  
8 participants counselor viewing their location and interacting with their place-based data of  
9 proximity and time spent in high-risk areas for binge drinking.<sup>46</sup>

### 21 *Reporting and quality measures*

22 All included studies reported on at least six items (Appendix 3). Position Health,<sup>43</sup> Stat!,<sup>45</sup> and  
23 ResQ<sup>44</sup> reported on how the intervention and data collected integrated into an existing health  
24 information system and described some data security procedures. CHESS<sup>46</sup> and the Wright et  
25 al.<sup>41</sup> intervention conducted some cost assessment regarding the delivery of the intervention or  
26 cost to the participant to utilize the participant. No study reported on compliance of the  
27 intervention or data collection mechanism compliance with national guidelines or federal  
28 statutes. We did not assess confidence in the body of evidence or risk of bias.

## 42 **Discussion**

43 The purpose of this scoping review was to describe the use of geofencing as an intervention and  
44 mechanisms that were targeted to achieve various health outcomes. A geofence involves creating  
45 virtual predefined set of boundaries or “fences” around a geographic location, including using  
46 GPS technology. Geofencing methodology can be used in public health research – both in  
47 observational and intervention studies. Thus, geofencing can be a valuable tool in intervention  
48  
49  
50  
51  
52  
53  
54  
55  
56  
57  
58  
59  
60

1  
2  
3 research, enabling researchers to study and implement interventions in specific geographic areas.  
4  
5 For example, geofencing allows researchers to precisely target specific areas for intervention. In  
6  
7 addition, geofencing allows researchers to send location-based notifications (an intervention) to  
8  
9 participants, including on their mobile devices. We identified only nine studies that fitted the  
10  
11 criteria and, as expected, most publications were relatively recent. We found that the design of  
12  
13 the geofencing intervention varied yet acceptability was good among study participants and  
14  
15 impact was not assessed in all studies.  
16  
17

18  
19 Of the studies included, only one was focused on a sexual and gender minority sample  
20  
21 and only one with majority Black, Indigenous People of Color (BIPOC), who experience  
22  
23 disparities on a vast number of health outcomes due to social and structural factors such as  
24  
25 racism and homophobia.<sup>23</sup> Lack of inclusion of these populations is a significant gap that should  
26  
27 be monitored as more studies are conducted. In addition, most studies were conducted in the  
28  
29 United States, with no studies in developing countries, South America, Africa or Asia, which  
30  
31 could represent an important opportunity.  
32  
33

34  
35 The included studies described a range of user input of the geofenced locations from  
36  
37 researcher only selection to user selection. This characteristic of an intervention merits  
38  
39 consideration. User selection of geofenced locations may be prone to bias and recall issues.<sup>48</sup>  
40  
41 Researcher selected locations may not consider the variability of their sample's place-based  
42  
43 contexts and may under count locations that should be geofenced. The hybrid approach has the  
44  
45 potential to address both limitations. Future studies using geofencing technology may warrant  
46  
47 comparative studies of the user input approaches and be specific about the rationale for the type  
48  
49 of locations that are geofenced and the user input of these so that studies can be comparable and  
50  
51 be conducted in non-western contexts.  
52  
53  
54  
55  
56  
57  
58  
59  
60

1  
2  
3 Some of the interventions explicitly identified a theoretical model or foundation, and all  
4 the studies described targeting at least one of the mechanisms of action from our proposed  
5 framework. The studies in which the geofencing intervention targeted the cognitive mechanism  
6 were primarily addressing surveillance of the participants and messages to cue cognitions about  
7 their location. Cueing is a significant component of many effective interventions as they serve as  
8 reminders to engage in behaviors of interest.<sup>49-51</sup> For example, wearing a bracelet that has a  
9 phrase as a reminder to take medication. Cues can focus on both the protective and risk  
10 dimensions of the mechanism. For example, if an individual triggers a geofence of a place they  
11 have identified as associated with a sense of control, a geofencing intervention could sent a text  
12 message that reminds the individual to engage in self-care. In places where stigma is anticipated  
13 a geofencing intervention can send a text message that reminds the individual about adaptive  
14 coping behaviors.

15  
16  
17  
18  
19  
20  
21  
22  
23  
24  
25  
26  
27  
28  
29  
30  
31 Studies utilizing the behavioral mechanism described very specific behavioral targets  
32 such as buying lower sodium food, avoiding places of alcohol use, condom use and smoking  
33 cessation. As building self-efficacy is a well-established theoretical construct necessary for  
34 behavioral change,<sup>24</sup> future studies should include opportunities to watch the desired behaviors  
35 be role-modeled and practiced to enhance the efficacy of the geofencing intervention.<sup>52</sup>

36  
37  
38  
39  
40  
41  
42 Studies that utilized the social mechanism were focused on the provision of both  
43 informational and emotional support. One study included a component in which the participants  
44 could create messages for other user of the geofencing application. As there are different types of  
45 social support (e.g., emotional, appraisal, economic and informational) future studies should be  
46 specific and transparent about the types being targeted. With additional geofencing studies, a  
47  
48  
49  
50  
51  
52  
53  
54  
55  
56  
57  
58  
59  
60

1  
2  
3 future review can be conducted using meta-analytic methods to determine the quantitative  
4 effectiveness of geofencing interventions in population health research.  
5  
6  
7  
8  
9

### 10 *Limitations*

11  
12 The search strategy was limited to English articles in PubMed, CINAHL, EMBASE Web of  
13 Science, Cochrane, and PsychINFO and we acknowledge other publications may not have been  
14 captured with these. There was heterogeneity in how studies reported intervention development,  
15 theoretical frameworks, and feasibility and acceptability of the intervention. This reduced the  
16 ability to properly assess the extent of behavioral mechanism utilized for the given outcome.  
17  
18 Additionally, as geofencing is a new technology, not many peer-reviewed articles have been  
19 published and this scoping review chose to exclude conference abstracts.  
20  
21  
22  
23  
24  
25  
26  
27  
28  
29

### 30 *Conclusions*

31  
32 This scoping review found geofencing to be an emerging technology that is an acceptable and  
33 feasible intervention applied to several different populations and health outcomes.<sup>23</sup> Attention to  
34 the mechanisms of actions will enable the field to understand not only whether geofencing is an  
35 appropriate and effective intervention but why it works to achieve the outcomes we observe.  
36  
37 There is a need for future research that includes sexual and gender minority and BIPOC  
38 populations and populations from non-Western contexts to achieve the Health People  
39 Framework objectives given the persistent findings that BIPOC and SGM populations. These  
40 studies could address those health outcomes where disparities are stark such as HIV/AIDS,  
41 cardiovascular, diabetes, COVID-related and mpox. Finally, future research can reveal place-  
42  
43  
44  
45  
46  
47  
48  
49  
50  
51  
52  
53  
54  
55  
56  
57  
58  
59  
60

1  
2  
3 based contexts that have not been considered which can inform resource allocation and targets  
4  
5 for health-promoting policies.  
6  
7

### 8 9 **Contributors**

10 Drs. Tobin and Heidari contributed equally to this manuscript. KT, OH and DD planned the  
11 study. KT, OH, CV and SS acquired data and conducted the analysis for this study. KT, OH and  
12 DD equally contributed to writing and finalizing the manuscript.  
13

### 14 15 **Competing interests**

16 We declare that we have no competing interests.  
17

### 18 19 **Funding**

20 This work was supported by a grant from the National Institute of Mental Health  
21 (R34MH118178).  
22

### 23 24 **Data availability statement**

25 No additional data available.  
26

### 27 28 **Ethics approval**

29 Ethics approval was not required as the scoping review is based on published studies.  
30  
31  
32  
33  
34  
35  
36  
37  
38  
39  
40  
41  
42  
43  
44  
45  
46  
47  
48  
49  
50  
51  
52  
53  
54  
55  
56  
57  
58  
59  
60

## References

1. Larson NI, Story MT, Nelson MC. Neighborhood environments: disparities in access to healthy foods in the US. *American journal of preventive medicine*. 2009;36(1):74-81. e10.
2. Lazar M, Davenport L. Barriers to health care access for low income families: a review of literature. *Journal of community health nursing*. 2018;35(1):28-37.
3. Kalichman SC, Kalichman MO. HIV-related stress and life chaos mediate the association between poverty and medication adherence among people living with HIV/AIDS. *Journal of clinical psychology in medical settings*. 2016;23(4):420-430.
4. Taylor SE, Repetti RL, Seeman T. Health psychology: what is an unhealthy environment and how does it get under the skin? *Annual review of psychology*. 1997;48
5. Earnshaw VA, Bogart LM, Dovidio JF, Williams DR. Stigma and racial/ethnic HIV disparities: moving toward resilience. 2015;
6. Lutete P, Matthews DW, Sabounchi NS, et al. Intersectional Stigma and Prevention Among Gay, Bisexual, and Same Gender-Loving Men in New York City, 2020: System Dynamics Models. *American journal of public health*. 2022;112(S4):S444-S451.
7. Quinn K, Dickson-Gomez J, Zarwell M, Pearson B, Lewis M. "A gay man and a doctor are just like, a recipe for destruction": How racism and homonegativity in healthcare settings influence PrEP uptake among young Black MSM. *AIDS and Behavior*. 2019;23(7):1951-1963.
8. Arcaya MC, Tucker-Seeley RD, Kim R, Schnake-Mahl A, So M, Subramanian S. Research on neighborhood effects on health in the United States: a systematic review of study characteristics. *Social Science & Medicine*. 2016;168:16-29.
9. Duncan DT, Kawachi I. *Neighborhoods and health*. vol 10. Oxford University Press New York; 2018.
10. Rifkin SB. Examining the links between community participation and health outcomes: a review of the literature. *Health policy and planning*. 2014;29(suppl\_2):ii98-ii106.
11. Gesler WM. Therapeutic landscapes: medical issues in light of the new cultural geography. *Social science & medicine*. 1992;34(7):735-746.
12. Keene DE, Padilla MB. Spatial stigma and health inequality. *Critical public health*. 2014;24(4):392-404.
13. Duncan DT, Kawachi I, Subramanian S, Aldstadt J, Melly SJ, Williams DR. Examination of how neighborhood definition influences measurements of youths' access to tobacco retailers: a methodological note on spatial misclassification. *American journal of epidemiology*. 2014;179(3):373-381.
14. Palmer JR, Espenshade TJ, Bartumeus F, Chung CY, Ozgencil NE, Li K. New approaches to human mobility: Using mobile phones for demographic research. *Demography*. 2013;50(3):1105-1128.
15. Heron KE, Smyth JM. Ecological momentary interventions: incorporating mobile technology into psychosocial and health behaviour treatments. *British journal of health psychology*. 2010;15(1):1-39.
16. Wang L, Miller LC. Just-in-the-moment adaptive interventions (JITAI): A meta-analytical review. *Health Communication*. 2020;35(12):1531-1544.
17. Nahum-Shani I, Smith SN, Spring BJ, et al. Just-in-time adaptive interventions (JITAI) in mobile health: key components and design principles for ongoing health behavior support. *Annals of Behavioral Medicine*. 2018;52(6):446-462.



18. Nguyen KT, Olgin JE, Pletcher MJ, et al. Smartphone-based geofencing to ascertain hospitalizations. *Circulation: Cardiovascular Quality and Outcomes*. 2017;10(3):e003326.
19. Ahmed N, Michelin RA, Xue W, et al. A survey of COVID-19 contact tracing apps. *IEEE access*. 2020;8:134577-134601.
20. Carpenter SM, Menictas M, Nahum-Shani I, Wetter DW, Murphy SA. Developments in mobile health just-in-time adaptive interventions for addiction science. *Current addiction reports*. 2020;7(3):280-290.
21. Naughton F. Delivering “Just-In-Time” smoking cessation support via mobile phones: current knowledge and future directions. *Nicotine & Tobacco Research*. 2017;19(3):379-383.
22. Thomas JG, Bond DS. Review of innovations in digital health technology to promote weight control. *Current diabetes reports*. 2014;14(5):1-10.
23. Besoain F, Perez-Navarro A, Aviñó CJ, Caylà JA, Barriga NA, de Olalla PG. Prevention of HIV and other sexually transmitted infections by geofencing and contextualized messages with a gamified app, UBESAFE: design and creation study. *JMIR mHealth and uHealth*. 2020;8(3):e14568.
24. Bandura A. Social cognitive theory: An agentic perspective. *Asian journal of social psychology*. 1999;2(1):21-41.
25. Turan B, Hatcher AM, Weiser SD, Johnson MO, Rice WS, Turan JM. Framing mechanisms linking HIV-related stigma, adherence to treatment, and health outcomes. *American journal of public health*. 2017;107(6):863-869.
26. Macintyre S, Ellaway A, Cummins S. Place effects on health: how can we conceptualise, operationalise and measure them? *Social science & medicine*. 2002;55(1):125-139.
27. Khawcharoenporn T, Mongkolkaewsub S, Najjitra C, Khonphiern W, Apisarnthanarak A, Phanuphak N. HIV risk, risk perception and uptake of HIV testing and counseling among youth men who have sex with men attending a gay sauna. *AIDS research and therapy*. 2019;16(1):1-11.
28. Machowska A, Bamboria BL, Bercan C, Sharma M. Impact of ‘HIV-related stigma-reduction workshops’ on knowledge and attitude of healthcare providers and students in Central India: a pre-test and post-test intervention study. *BMJ open*. 2020;10(4):e033612.
29. Mi T, Li X, Zhou G, Qiao S, Shen Z, Zhou Y. HIV disclosure to family members and medication adherence: role of social support and self-efficacy. *AIDS and Behavior*. 2020;24(1):45-54.
30. SeyedAlinaghi S, MohsseniPour M, Aghaei E, Zarani F, Fathabadi J, Mohammadifirouzeh M. The Relationships Between Early Maladaptive Schemas, Quality of Life and Self-care Behaviors in a Sample of Persons Living with HIV: The Potential Mediating Role of Cognitive Emotion Regulation Strategies. *The Open AIDS Journal*. 2020;14(1)
31. Steptoe A, Jackson SE. The life skills of older Americans: association with economic, psychological, social, and health outcomes. *Scientific Reports*. 2018;8(1):1-10.
32. Yigit I, Bayramoglu Y, Weiser SD, et al. Changes in internalized stigma and HIV health outcomes in individuals new to HIV care: The mediating roles of depression and treatment self-efficacy. *AIDS Patient Care and STDs*. 2020;34(11):491-497.
33. Gonzalez A, Barinas J, O’Cleirigh C. Substance use: impact on adherence and HIV medical treatment. *Current HIV/AIDS Reports*. 2011;8(4):223-234.
34. Logie CH, Williams CC, Wang Y, et al. Adapting stigma mechanism frameworks to explore complex pathways between intersectional stigma and HIV-related health outcomes among women living with HIV in Canada. *Soc Sci Med*. 2019;232:129-38.

- 1
- 2
- 3
- 4 35. Safren SA, Blashill AJ, Lee JS, et al. Condom-use self-efficacy as a mediator between
- 5 syndemics and condomless sex in men who have sex with men (MSM). *Health psychology*.
- 6 2018;37(9):820.
- 7 36. Bekele T, Rourke SB, Tucker R, et al. Direct and indirect effects of perceived social
- 8 support on health-related quality of life in persons living with HIV/AIDS. *AIDS care*.
- 9 2013;25(3):337-346.
- 10 37. Koegler E, Kennedy CE. A scoping review of the associations between mental health and
- 11 factors related to HIV acquisition and disease progression in conflict-affected populations.
- 12 *Conflict and health*. 2018;12(1):1-22.
- 13 38. Vaughan E, Power M, Sixsmith J. Experiences of stigma in healthcare settings by people
- 14 living with HIV in Ireland: a qualitative study. *AIDS care*. 2020;32(9):1162-1167.
- 15 39. Tricco AC, Lillie E, Zarin W, et al. PRISMA extension for scoping reviews (PRISMA-
- 16 ScR): checklist and explanation. *Annals of internal medicine*. 2018;169(7):467-473.
- 17 40. Agarwal S, LeFevre AE, Lee J, et al. Guidelines for reporting of health interventions
- 18 using mobile phones: mobile health (mHealth) evidence reporting and assessment (mERA)
- 19 checklist. *bmj*. 2016;352
- 20 41. Wright WG, Rafferty AP, Winterbauer N, Locklear K, Tucker-McLaughlin M.
- 21 Geofencing: Mobile Technology as a Health Promotion Tool to Raise Awareness of a Dental
- 22 Clinic in Rural North Carolina. *The Journal of Rural Health*. 2021;37(3):667-674.
- 23 42. Naughton F, Hopewell S, Lathia N, et al. A context-sensing mobile phone app (Q sense)
- 24 for smoking cessation: a mixed-methods study. *JMIR mHealth and uHealth*. 2016;4(3):e5787.
- 25 43. DeFilippis EM, Safavi K, Reyes J, Coakley L, Hickey M, Givertz MM. Mobile
- 26 Geolocation Technology to Improve Multidisciplinary Care of Patients with Ventricular Assist
- 27 Devices: A Feasibility Study. *Journal of Cardiac Failure*. 2017;23(8):S84.
- 28 44. Owei L, Luks VL, Brooks KD, Kelz RR, Berns JS, Aarons CB. Smart-phone Based
- 29 Geofencing: A Novel Approach to Monitoring Clinical Work Hours in Surgery Residency.
- 30 *Journal of Surgical Education*. 2021;78(6):e210-e217.
- 31 45. Connor CW, Herzig M. Monitoring the location of staff via mobile devices in a large
- 32 multifacility practice group. *A & A case reports*. 2016;6(10):320-328.
- 33 46. Gustafson DH, McTavish FM, Chih M-Y, et al. A smartphone application to support
- 34 recovery from alcoholism: a randomized clinical trial. *JAMA psychiatry*. 2014;71(5):566-572.
- 35 47. Dorsch MP, Cornellier ML, Poggi AD, et al. Effects of a novel contextual just-in-time
- 36 mobile app intervention (LowSalt4Life) on sodium intake in adults with hypertension: pilot
- 37 randomized controlled trial. *JMIR mHealth and uHealth*. 2020;8(8):e16696.
- 38 48. Wray TB, Pérez AE, Celio MA, Carr DJ, Adia AC, Monti PM. Exploring the Use of
- 39 Smartphone Geofencing to Study Characteristics of Alcohol Drinking Locations in High-Risk
- 40 Gay and Bisexual Men. *Alcoholism: clinical and experimental research*. 2019;43(5):900-906.
- 41 49. Latkin CA, Hua W, Tobin K. Social network correlates of self-reported non-fatal
- 42 overdose. *Drug and Alcohol Dependence*. 2004;73(1):61-67.
- 43 50. Tobin KE, Davey MA, Latkin CA. Calling emergency medical services during drug
- 44 overdose: an examination of individual, social and setting correlates. *Addiction*.
- 45 2005;100(3):397-404.
- 46 51. Tobin KE, Latkin CA. Social networks of HIV positive gay men: their role and
- 47 importance in HIV prevention. *Understanding Prevention for HIV Positive Gay Men*. Springer;
- 48 2017:349-366.
- 49
- 50
- 51
- 52
- 53
- 54
- 55
- 56
- 57
- 58
- 59
- 60

1  
2  
3 52. Tobin KE, Heidari O, Winiker A, et al. Peer Approaches to Improve HIV Care Cascade  
4 Outcomes: a Scoping Review Focused on Peer Behavioral Mechanisms. *Current HIV/AIDS*  
5 *Reports*. 2022:1-14.  
6  
7  
8

9 **Figure 1.** Types and mechanisms of action, protective and risk factors as well as spatial scales in  
10 geofencing interventions in population health research.  
11

12 **Figure 2.** PRISMA flow diagram  
13  
14  
15  
16  
17  
18  
19  
20  
21  
22  
23  
24  
25  
26  
27  
28  
29  
30  
31  
32  
33  
34  
35  
36  
37  
38  
39  
40  
41  
42  
43  
44  
45  
46  
47  
48  
49  
50  
51  
52  
53  
54  
55  
56  
57  
58  
59  
60

For peer review only

1  
2  
3  
4  
5  
6  
7  
8  
9  
10  
11  
12  
13  
14  
15  
16  
17  
18  
19  
20  
21  
22  
23  
24  
25  
26  
27  
28  
29  
30  
31  
32  
33  
34  
35  
36  
37  
38  
39  
40  
41  
42  
43  
44  
45  
46  
47  
48  
49  
50  
51  
52  
53  
54  
55  
56  
57  
58  
59  
60

Figure 1. Types of mechanisms of action, protective and risk factors as well as spatial scales in geofencing interventions in population health research.

| <b>Mechanisms of Action</b> | <b>Protective</b>                 | <b>Risk</b>                                           | <b>Spatial Scales</b>                         |
|-----------------------------|-----------------------------------|-------------------------------------------------------|-----------------------------------------------|
| Cognitive                   | Sense of control<br>Self-efficacy | Internalized & anticipated stigma<br>Risk perceptions | Room<br>Home<br>Block<br>Neighborhood<br>City |
| Behavioral                  | Adaptive Coping<br>Self-care      | Substance use<br>Non-adherence to medication          | County<br>State<br>Region                     |
| Social                      | Instrumental & Emotional support  | Enacted stigma<br>Conflict                            | Nation<br>Globe                               |

215x279mm (200 x 200 DPI)

Figure 2. PRISMA diagram of selected studies

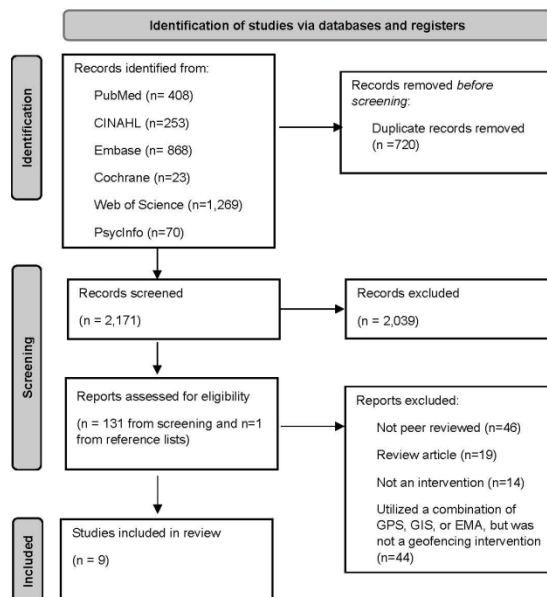

210x297mm (200 x 200 DPI)

**Appendix 1.** Detailed search strategy across n=6 databases**PubMed**

| Concept             | Search Terms                                                                                                                                                                                                                                                                             |
|---------------------|------------------------------------------------------------------------------------------------------------------------------------------------------------------------------------------------------------------------------------------------------------------------------------------|
| Mobile applications | ("Smartphone"[Mesh]) OR "Mobile Applications"[Mesh] OR smartphon* [tiab] OR "mobile application*" [tw] OR "mobile app" [tw] OR "mobile apps" [tw] OR "mobile phon*" [tw]                                                                                                                 |
| Geofencing          | "Geographic Information Systems"[Mesh] OR "Geographic Information System" [tw] OR "Geographical Information System" [tw] OR "Geographical Information Systems" [tw] OR "Georeferencing" [tw] OR "Global Positioning System" [tw] OR "Global Positioning Systems" [tw] OR "Geofenc*" [tw] |

**Embase**

| Concept             | Search Terms                                                                                                                                                                                                                                                                                                                                         |
|---------------------|------------------------------------------------------------------------------------------------------------------------------------------------------------------------------------------------------------------------------------------------------------------------------------------------------------------------------------------------------|
| Mobile applications | 'mobile phone'/exp OR 'wireless communication'/exp OR 'mobile application'/exp OR smartphon*:ti,ab,kw OR 'mobile application*':ti,ab,kw OR 'mobile app':ti,ab,kw OR 'mobile apps':ti,ab,kw OR 'mobile phon*':ti,ab,kw                                                                                                                                |
| Geofencing          | 'geographic information system'/exp OR 'global positioning system'/exp OR 'geographic information system':ti,ab,kw OR 'geographical information system':ti,ab,kw OR 'geographical information systems':ti,ab,kw OR 'georeferencing':ti,ab,kw OR 'global positioning system':ti,ab,kw OR 'global positioning systems':ti,ab,kw OR 'geofenc*':ti,ab,kw |

**CINAHL**

| Concept             | Search Terms                                                                                                                                                                                                                                        |
|---------------------|-----------------------------------------------------------------------------------------------------------------------------------------------------------------------------------------------------------------------------------------------------|
| Mobile applications | (MH "Smartphone") OR (MH "Cellular Phone+") OR (MH "Text Messaging+") OR (MH "Mobile Applications") OR smartphon* OR "mobile application*" OR "mobile app" OR "mobile apps" OR "mobile phon"                                                        |
| Geofencing          | (MH "Geographic Information Systems+") OR "Geographic Information System" OR "Geographical Information System" OR "Geographical Information Systems" OR "Georeferencing" OR "Global Positioning System" OR "Global Positioning Systems" OR Geofenc* |

**Cochrane**

| Concept             | Search Terms                                                                                                                                                                                      |
|---------------------|---------------------------------------------------------------------------------------------------------------------------------------------------------------------------------------------------|
| Mobile applications | ([mh Smartphone]) OR [mh "Mobile Applications"] OR smartphon*:ti,ab OR ("mobile" NEXT application*):ti,ab,kw OR "mobile app":ti,ab,kw OR "mobile apps":ti,ab,kw OR ("mobile" NEXT phon*):ti,ab,kw |

|            |                                                                                                                                                                                                                                                                                                                 |
|------------|-----------------------------------------------------------------------------------------------------------------------------------------------------------------------------------------------------------------------------------------------------------------------------------------------------------------|
| Geofencing | [mh "Geographic Information Systems"] OR "Geographic Information System":ti,ab,kw OR "Geographical Information System":ti,ab,kw OR "Geographical Information Systems":ti,ab,kw OR Georeferencing:ti,ab,kw OR "Global Positioning System":ti,ab,kw OR "Global Positioning Systems":ti,ab,kw OR Geofenc*:ti,ab,kw |
|------------|-----------------------------------------------------------------------------------------------------------------------------------------------------------------------------------------------------------------------------------------------------------------------------------------------------------------|

### Web of Science

| Concept             | Search Terms                                                                                                                                                                                                                                      |
|---------------------|---------------------------------------------------------------------------------------------------------------------------------------------------------------------------------------------------------------------------------------------------|
| Mobile applications | (ALL=((Smartphone) OR "Mobile Applications" OR smartphon* OR "mobile application*" OR "mobile app" OR "mobile apps" OR "mobile phon*"))                                                                                                           |
| Geofencing          | ALL=("Geographic Information Systems" OR "Geographic Information System" OR "Geographical Information System" OR "Geographical Information Systems" OR Georeferencing OR "Global Positioning System" OR "Global Positioning Systems" OR Geofenc*) |

### APA PsychINFO

| Concept             | Search Terms                                                                                                                                                                                                                             |
|---------------------|------------------------------------------------------------------------------------------------------------------------------------------------------------------------------------------------------------------------------------------|
| Mobile applications | DE "Smartphones" OR DE "Mobile Applications" OR DE "Smartphone Use" OR DE "Text Messaging" OR DE "Wireless Technologies" OR DE "Mobile Phones" OR smartphon* OR "mobile application*" OR "mobile app" OR "mobile apps" OR "mobile phon*" |
| Geofencing          | "Geographic Information System" OR "Geographical Information System" OR "Geographical Information Systems" OR "Georeferencing" OR "Global Positioning System" OR "Global Positioning Systems" OR Geofenc*                                |

1  
2  
3  
4  
5  
6  
7  
8  
9  
10  
11  
12  
13  
14  
15  
16  
17  
18  
19  
20  
21  
22  
23  
24  
25  
26  
27  
28  
29  
30  
31  
32  
33  
34  
35  
36  
37  
38  
39  
40  
41  
42  
43  
44  
45  
46  
47

| Appendix 2. Details of nine studies that met inclusion criteria for the scoping review |                                                                                                                                                                                                                                                                                                                                                                                                                                                                                                                                                                                                                                                                                                 |                                                                                                                                                                                                                                                                                                       |                                                                                                                                                                                                                                                                                                                              |                                                                                                                                                                                                                    |
|----------------------------------------------------------------------------------------|-------------------------------------------------------------------------------------------------------------------------------------------------------------------------------------------------------------------------------------------------------------------------------------------------------------------------------------------------------------------------------------------------------------------------------------------------------------------------------------------------------------------------------------------------------------------------------------------------------------------------------------------------------------------------------------------------|-------------------------------------------------------------------------------------------------------------------------------------------------------------------------------------------------------------------------------------------------------------------------------------------------------|------------------------------------------------------------------------------------------------------------------------------------------------------------------------------------------------------------------------------------------------------------------------------------------------------------------------------|--------------------------------------------------------------------------------------------------------------------------------------------------------------------------------------------------------------------|
| Name/citation<br>Geofenced<br>intervention<br>Refernce<br>number                       | Study characteristics                                                                                                                                                                                                                                                                                                                                                                                                                                                                                                                                                                                                                                                                           | Development of<br>geofence                                                                                                                                                                                                                                                                            | Results                                                                                                                                                                                                                                                                                                                      | Theory and<br>framework                                                                                                                                                                                            |
| Wright et al.,<br>2021<br><br>Vendor not<br>cited<br><br>41                            | <p><i>Study purpose:</i> Increase awareness and use of dental services in a rural clinic</p> <p><i>Study design:</i> Pre and post intervention community and outcome assessments</p> <p><i>Target population:</i> Residents of a rural zip code surrounding a dental clinic</p> <p><i>Sample size:</i> 516,073 impressions delivered to individuals crossing the geofence</p> <p><i>Duration of follow-up:</i> Impressions were sent over a 60-day period</p> <p><i>Outcome of interest:</i> Number of impressions displayed to a user, clicks on the banner, click-through rates on the dental website from the banner, and pre/post intervention community knowledge of the dental clinic</p> | <p><i>User input:</i> None</p> <p><i>Mechanism of delivery:</i> Any individual with a smartphone physically located within the boundaries of three zip codes near the dental clinic received a geofence message advertising the dental clinic with webpage information for additional information</p> | <p>Over 60 days, 516,073 impressions were delivered, with 475 individuals clicks on the banner to get website information, and a click through rate of 0.09%.</p> <p>Increases were seen in community knowledge about the clinic (p=0.045) and dental visits by respondent or a family member (p=0.04) post intervention</p> | <p><i>Theoretical framework:</i> Anderson Model of Health Services Use</p> <p><i>Behavioral</i></p> <p><i>Social:</i> Informational support of an existing service that is place-based</p> <p><i>Cognitive</i></p> |



|                                                        |                                                                                                                                                                                                                                                                                                                                                                                                                                                                                                                                                                                                                                                                                                              |                                                                                                                                                                                                                                                                          |                                                                                                                                                                                                                                                                                                                                                                                                            |                                                                                                                                                                                    |
|--------------------------------------------------------|--------------------------------------------------------------------------------------------------------------------------------------------------------------------------------------------------------------------------------------------------------------------------------------------------------------------------------------------------------------------------------------------------------------------------------------------------------------------------------------------------------------------------------------------------------------------------------------------------------------------------------------------------------------------------------------------------------------|--------------------------------------------------------------------------------------------------------------------------------------------------------------------------------------------------------------------------------------------------------------------------|------------------------------------------------------------------------------------------------------------------------------------------------------------------------------------------------------------------------------------------------------------------------------------------------------------------------------------------------------------------------------------------------------------|------------------------------------------------------------------------------------------------------------------------------------------------------------------------------------|
| <p>Owei et al., 2021</p> <p>ResQ</p> <p>44</p>         | <p><i>Study purpose:</i> Assess the impact of the ResQ geofencing app on submission rates for duty hours and number of violations reported</p> <p><i>Study design:</i> Mixed methods feasibility and acceptability of the ResQ app.</p> <p><i>Target population:</i> Residents from the General Surgery Residency Program</p> <p><i>Sample size:</i> 23</p> <p><i>Duration of follow-up:</i> 60 days</p> <p><i>Outcome of interest:</i> Comparison of reported and recorded work hours submitted and work hour violations (80 hours per week and continuous hours worked). Additionally, 13 participants participated in semi-structured interviews to understand acceptability and feasibility of ResQ.</p> | <p><i>User input:</i> None</p> <p><i>Mechanism of delivery:</i> Geofences were placed around clinical sites where residents worked. The ResQ application was installed on resident's work phones and recorded work hours based on entering and exiting the geofence.</p> | <p>The mean number of violations decreased significantly (<math>p=0.04</math>) and work hour submissions did not differ with the intervention (<math>p=0.42</math>). Compared to the previous year, reported violations significantly decreased (<math>p&lt;0.01</math>).</p> <p>Participants found the application useful for recording and reporting clinical hours and eased administrative burden.</p> | <p><i>Theoretical framework:</i> None listed</p> <p><i>Behavioral</i></p> <p><i>Social</i></p> <p><i>Cognitive:</i> Sense of safety in capture and reporting of clinical hours</p> |
| <p>Gustafson et al., 2014</p> <p>A-CHESS</p> <p>46</p> | <p><i>Study purpose:</i> Determine if a smartphone application to support recovery from alcohol use disorders reduced risky drinking days.</p> <p><i>Study design:</i> Unmasked randomized clinical trial</p>                                                                                                                                                                                                                                                                                                                                                                                                                                                                                                | <p><i>User input:</i> High-risk locations were identified by participants</p> <p><i>Mechanism of delivery:</i> Study team geofenced user</p>                                                                                                                             | <p>Along with the geofenced intervention, A-CHESS was a mobile application that provided monitoring, information, communication, and support services from counselors. Overall the A-</p>                                                                                                                                                                                                                  | <p><i>Theoretical framework:</i> Self-determination theory</p> <p><i>Behavioral:</i> Warning messages sent in risky areas</p>                                                      |

1  
2  
3  
4  
5  
6  
7  
8  
9  
10  
11  
12  
13  
14  
15  
16  
17  
18  
19  
20  
21  
22  
23  
24  
25  
26  
27  
28  
29  
30  
31  
32  
33  
34  
35  
36  
37  
38  
39  
40  
41  
42  
43  
44  
45  
46  
47

|                                                       |                                                                                                                                                                                                                                                                                                                                                                                                                                                                                                                              |                                                                                                                                                                                                                                                                      |                                                                                                                                                                                                                                                                                                                                                                                                                                   |                                                                                                                                                                                         |
|-------------------------------------------------------|------------------------------------------------------------------------------------------------------------------------------------------------------------------------------------------------------------------------------------------------------------------------------------------------------------------------------------------------------------------------------------------------------------------------------------------------------------------------------------------------------------------------------|----------------------------------------------------------------------------------------------------------------------------------------------------------------------------------------------------------------------------------------------------------------------|-----------------------------------------------------------------------------------------------------------------------------------------------------------------------------------------------------------------------------------------------------------------------------------------------------------------------------------------------------------------------------------------------------------------------------------|-----------------------------------------------------------------------------------------------------------------------------------------------------------------------------------------|
|                                                       | <p><i>Target population:</i> People with diagnosed alcohol dependence discharged from residential treatment</p> <p><i>Sample size:</i> 349</p> <p><i>Duration of follow-up:</i> 8 months</p> <p><i>Outcome of interest:</i> Risky drinking days in the previous 30 days</p>                                                                                                                                                                                                                                                  | <p>identified high-risk locations and sent alerts to the user’s smartphone asking if they wanted to be there</p>                                                                                                                                                     | <p>CHES group reported fewer risky drinking days at follow-up (p=0.003)</p>                                                                                                                                                                                                                                                                                                                                                       | <p><i>Social:</i> Informational support with counselors</p> <p><i>Cognitive:</i> Passive and real-time capture of information shared with counselors</p>                                |
| <p>Nguyen et al., 2017</p> <p>Ginger.io</p> <p>18</p> | <p><i>Study purpose:</i> Evaluate the use of smartphone-based geofencing for tracking hospitalizations</p> <p><i>Study design:</i> Remote and in-person arm validation of a mobile application that detected hospitalizations and length of hospitalization</p> <p><i>Target population:</i> Remote- participants from the Health eHeart study with a smartphone<br/>In-person- Patients scheduled for electrophysiology and cardiac catheterization procedures.</p> <p><i>Sample size:</i> Remote- 3,443; In person- 22</p> | <p><i>User input:</i> None</p> <p><i>Mechanism of delivery:</i> The app was programmed with all U.S. hospitals geofenced. A notification was sent to within 1 hour of leaving the hospital vicinity asking participants to confirm if they received medical care</p> | <p>Remote- The application detected 800 unique participants in a geofenced location with a positive predictive value between 65-78% based on how hospitalization was confirmed. Most common error in detection was the participant was a medical center employee.</p> <p>In person- Visits were detected in 17/22 with confirmed hospitalization. Mean visit duration was not correlated with actual hospital length of stay.</p> | <p><i>Theoretical framework:</i> None listed</p> <p><i>Behavioral</i></p> <p><i>Social</i></p> <p><i>Cognitive:</i> Sense of safety in provider knowing your hospitalization status</p> |

|                                                       |                                                                                                                                                                                                                                                                                                                                                                                                                                                                                                                                                                                                                                                                                              |                                                                                                                                                                                                                                                                                                                                                                            |                                                                                                                                                                                                                                                                                                                                                                                                                                                                                                                                                                    |                                                                                                                                                                                                                          |
|-------------------------------------------------------|----------------------------------------------------------------------------------------------------------------------------------------------------------------------------------------------------------------------------------------------------------------------------------------------------------------------------------------------------------------------------------------------------------------------------------------------------------------------------------------------------------------------------------------------------------------------------------------------------------------------------------------------------------------------------------------------|----------------------------------------------------------------------------------------------------------------------------------------------------------------------------------------------------------------------------------------------------------------------------------------------------------------------------------------------------------------------------|--------------------------------------------------------------------------------------------------------------------------------------------------------------------------------------------------------------------------------------------------------------------------------------------------------------------------------------------------------------------------------------------------------------------------------------------------------------------------------------------------------------------------------------------------------------------|--------------------------------------------------------------------------------------------------------------------------------------------------------------------------------------------------------------------------|
|                                                       | <p><i>Duration of follow-up:</i> Remote- mean of 260 days; In person- Duration of their scheduled procedure</p> <p><i>Outcome of interest:</i> Detection of hospitalization</p>                                                                                                                                                                                                                                                                                                                                                                                                                                                                                                              |                                                                                                                                                                                                                                                                                                                                                                            |                                                                                                                                                                                                                                                                                                                                                                                                                                                                                                                                                                    |                                                                                                                                                                                                                          |
| <p>Naughton et al., 2016</p> <p>Q Sense</p> <p>20</p> | <p><i>Study purpose:</i> Feasibility and acceptability of a mobile application using geofencing to deliver tailored place-based intervention messages</p> <p><i>Study design:</i> Explanatory sequential mixed methods</p> <p><i>Target population:</i> Tobacco smokers willing to set a quit date within 1 month</p> <p><i>Sample size:</i> 15 in quantitative arm and 13 qualitative interviews</p> <p><i>Duration of follow-up:</i> Pre-quit period (up to 1 month) and 2 weeks post-quit date</p> <p><i>Outcome of interest:</i> 1) User engagement with app; 2) Assess app's location-sensing accuracy; 3) Feasibility of geofence mechanism; 4) Limitations of everyday use of app</p> | <p><i>User input:</i><br/>Geofences based on user habits and reports of smoking locations</p> <p><i>Mechanism of delivery:</i> If a smoker reported smoking in the same proximity, the device created a geofence around that area with a radius of 100m. When a user entered the geofence for greater than 5 minutes a location-tailored support message was triggered</p> | <p>User engagement with the application varied from 60% of days pre-quit and 39% post-quit (52% excluding outliers).</p> <p>Geolocation was collected on 97% of smoking reports with high accuracy. A mean of 1.5 geofences were created per participant with 87% having at least one. 5/9 participants eligible to receive a geofenced triggered message received at least one.</p> <p>Environmental constraints and forgetfulness were common reasons for forgetting to engage with app. Participants were positive about the value of the geofenced support</p> | <p><i>Theoretical framework:</i><br/>Learning theory and taxonomy of smoking behavior change</p> <p><i>Behavioral:</i> Coping and resilience regarding smoking triggers</p> <p><i>Social</i></p> <p><i>Cognitive</i></p> |

|                                                                                                                                                                                     |                                                          |                                                                                                                                                                                                                                                                                                                                                                                                                                                                                                                                          |                                                                                                                                                                                                                                                                                                                                                                           |                                                                                                                                                                                                                                                                                                                                                        |                                                                                                                                                                                                                                                                                                                                        |
|-------------------------------------------------------------------------------------------------------------------------------------------------------------------------------------|----------------------------------------------------------|------------------------------------------------------------------------------------------------------------------------------------------------------------------------------------------------------------------------------------------------------------------------------------------------------------------------------------------------------------------------------------------------------------------------------------------------------------------------------------------------------------------------------------------|---------------------------------------------------------------------------------------------------------------------------------------------------------------------------------------------------------------------------------------------------------------------------------------------------------------------------------------------------------------------------|--------------------------------------------------------------------------------------------------------------------------------------------------------------------------------------------------------------------------------------------------------------------------------------------------------------------------------------------------------|----------------------------------------------------------------------------------------------------------------------------------------------------------------------------------------------------------------------------------------------------------------------------------------------------------------------------------------|
|                                                                                                                                                                                     |                                                          |                                                                                                                                                                                                                                                                                                                                                                                                                                                                                                                                          | and had no privacy concerns.                                                                                                                                                                                                                                                                                                                                              |                                                                                                                                                                                                                                                                                                                                                        |                                                                                                                                                                                                                                                                                                                                        |
| 1<br>2<br>3<br>4<br>5<br>6<br>7<br>8<br>9<br>10<br>11<br>12<br>13<br>14<br>15<br>16<br>17<br>18<br>19<br>20<br>21<br>22<br>23<br>24<br>25<br>26<br>27<br>28<br>29<br>30<br>31<br>32 | Dorsch et al., 2020<br><br>LowSalt4Life<br><br>47        | <p><i>Study purpose:</i> Effectiveness of the LowSalt4Life mobile app on maintaining a low sodium diet and controlling blood pressure</p> <p><i>Study design:</i> Unblinded randomized control trial</p> <p><i>Target population:</i> Adults diagnosed with hypertension and taking antihypertensive medication</p> <p><i>Sample size:</i> 50 randomized</p> <p><i>Duration of follow-up:</i> 8 weeks</p> <p><i>Outcome of interest:</i> Changes in 24-hour dietary recall and sodium intake, urine sodium excretion, blood pressure</p> | <p><i>User input:</i> Mixed. Geofences were created based on user input as well as from a predictive service when a participant entered a grocery store, restaurant, or home.</p> <p><i>Mechanism of delivery:</i> Contextual adaptive messages were sent to participant's phones when entering a geofence, with messages linked to content in the mobile application</p> | <p>There was a significant decrease in sodium excretion (<math>p=0.03</math>) and decrease in sodium intake via 24 hour dietary recall (<math>p=0.01</math>) and in the App group vs no App groups. Blood pressure decreased by 1.7 mmHg in the App group compared to 0.7 in the no App, but the change was not significant (<math>p=0.12</math>).</p> | <p><i>Theoretical framework:</i> Theory of Planned Behavior</p> <p><i>Behavioral:</i> Dietary messages sent when participant is in areas where they would purchase/consume food</p> <p><i>Social:</i> Informational support regarding which products and food choices had lower sodium in context of place</p> <p><i>Cognitive</i></p> |
| 33<br>34<br>35<br>36<br>37<br>38<br>39<br>40<br>41<br>42<br>43<br>44<br>45<br>46<br>47                                                                                              | DeFilippis et al., 2017<br><br>Position Health<br><br>43 | <p><i>Study purpose:</i> Determine the feasibility of patients with ventricular assist devices care engagement with and feasibility of a geofencing notification system.</p> <p><i>Study design:</i> Feasibility study with quantitative and qualitative measures</p>                                                                                                                                                                                                                                                                    | <p><i>User input:</i> None</p> <p><i>Mechanism of delivery:</i> Geofences were drawn around emergency departments (ED)</p>                                                                                                                                                                                                                                                | <p>The system was active on 4 occasions, each of which the participant confirmed they were at or near the hospital but were not seeking care. 1 patient</p>                                                                                                                                                                                            | <p><i>Theoretical framework:</i> None listed</p> <p><i>Behavioral</i></p> <p><i>Social</i></p>                                                                                                                                                                                                                                         |

|                                                         |                                                                                                                                                                                                                                                                                                             |                                                                                                                                                                                                                                                                                                                                                                                                            |                                                                                                                                                                                                                     |                                                                                                                                                                        |
|---------------------------------------------------------|-------------------------------------------------------------------------------------------------------------------------------------------------------------------------------------------------------------------------------------------------------------------------------------------------------------|------------------------------------------------------------------------------------------------------------------------------------------------------------------------------------------------------------------------------------------------------------------------------------------------------------------------------------------------------------------------------------------------------------|---------------------------------------------------------------------------------------------------------------------------------------------------------------------------------------------------------------------|------------------------------------------------------------------------------------------------------------------------------------------------------------------------|
|                                                         | <p><i>Target population:</i> Adults with a ventricular assist device (VAD)</p> <p><i>Sample size:</i> 21</p> <p><i>Duration of follow-up:</i> 6 months</p> <p><i>Outcome of interest:</i> Proper detection of emergency department utilization by participant and satisfaction with mobile application.</p> | <p>across the U.S. Once the application detected that a participant approached an ED, a prompt was sent to their phone to confirm if they were seeking care at that hospital. If yes, another prompt asked the participant to confirm if the app could notify their VAD healthcare team. If 'yes' to both, a notification was sent to the covering provider's pager with participant name and contact.</p> | <p>reported seeking ED care but did not receive a ping.</p> <p>Most patients responded favorable to their impression of the application stating that it "gave them peace of mind."</p>                              | <p><i>Cognitive:</i> Sense of safety to participants that emergency room and hospitalizations could alert their VAD provider regarding the need to coordinate care</p> |
| <p>Connor &amp; Herzig, 2016</p> <p>Stat!</p> <p>45</p> | <p><i>Study purpose:</i> Determine the feasibility and acceptability of a mobile application that allow automatic capture of work hours without manual employee input</p> <p><i>Study design:</i> Feasibility study</p>                                                                                     | <p><i>User input:</i> None</p> <p><i>Mechanism of delivery:</i> Geofences were drawn around hospitals where the anesthesia group provided services.</p>                                                                                                                                                                                                                                                    | <p>Use of the geofencing application showed a significant correlation of early departures following late departures the previous day (<math>p &lt; 0.01</math> in 73 of 91 occasions), and better dispersion of</p> | <p><i>Theoretical framework:</i> None listed</p> <p><i>Behavioral</i></p> <p><i>Social</i></p>                                                                         |

1  
2  
3  
4  
5  
6  
7  
8  
9  
10  
11  
12  
13  
14  
15  
16  
17  
18  
19  
20  
21  
22  
23  
24  
25  
26  
27  
28  
29  
30  
31  
32  
33  
34  
35  
36  
37  
38  
39  
40  
41  
42  
43  
44  
45  
46  
47

|                                                      |                                                                                                                                                                                                                                                                                                                                                                                                                                                                                                                                                          |                                                                                                                                                                                                                                                                                                                                |                                                                                                                                                                                                                                                                                                                                                                                                           |                                                                                                                                                                                                                                                                      |
|------------------------------------------------------|----------------------------------------------------------------------------------------------------------------------------------------------------------------------------------------------------------------------------------------------------------------------------------------------------------------------------------------------------------------------------------------------------------------------------------------------------------------------------------------------------------------------------------------------------------|--------------------------------------------------------------------------------------------------------------------------------------------------------------------------------------------------------------------------------------------------------------------------------------------------------------------------------|-----------------------------------------------------------------------------------------------------------------------------------------------------------------------------------------------------------------------------------------------------------------------------------------------------------------------------------------------------------------------------------------------------------|----------------------------------------------------------------------------------------------------------------------------------------------------------------------------------------------------------------------------------------------------------------------|
|                                                      | <p><i>Target population:</i> Anesthesia providers in a private practice group</p> <p><i>Sample size:</i> 198</p> <p><i>Duration of follow-up:</i> 12 months</p> <p><i>Outcome of interest:</i> Equitable workload distribution, employee acceptance and uptake, and reduced dispersion of the amount of overtime worked by staff</p>                                                                                                                                                                                                                     | <p>When the provider enters a geofence, their time at the facility is continuously checked and reported to a central server. Reports were then used to inform future clinical responsibilities and overtime worked</p>                                                                                                         | <p>working hours (<math>p=0.002</math>) compared to the previous year.</p> <p>Acceptance of the mobile application was slow to start but &gt;95% in less than 1 year of roll out</p>                                                                                                                                                                                                                      | <p><i>Cognitive:</i> Sense of security regarding equitable distribution of work based on geofenced data and capture of time working for billing purposes</p>                                                                                                         |
| <p>Besoain et al., 2020</p> <p>UBESafe</p> <p>22</p> | <p><i>Study purpose:</i> Prevent sexually transmitted infections (STIs) by sending preventive measures in risky situations</p> <p><i>Study design:</i> Development and feasibility</p> <p><i>Target population:</i> Men who have sex with men</p> <p><i>Sample size:</i> Development-5; Feasibility- 4</p> <p><i>Duration of follow-up:</i> Development- 2 weeks; Feasibility- 1 month</p> <p><i>Outcome of interest:</i> Development- functional testing to receive user feedback; Feasibility- try the UBESAFE system with all its functionalities</p> | <p><i>User input:</i> Mixed. Hot zones were created by a system administrator and with input from users</p> <p><i>Mechanism of delivery:</i> Geofenced hot zones are areas demines with a high probability for intercourse. When users enter a hot zone, a contextual message to prevent HIV and STIs, and promote testing</p> | <p>All users triggered a geofenced hotzone during the development phase, though this was not quantified further. Hot zones were seen as a necessary component from those testing in the development phase.</p> <p>In the feasibility phase, users tested and rated prevention messages as well as adding their own.</p> <p>Users also contributed to hot zones and tested existing ones, contributing</p> | <p><i>Theoretical framework:</i> Elaboration likelihood model</p> <p><i>Behavioral:</i> Contextual messages for sexual risk reduction sent in hot spots for high-risk intercourse</p> <p><i>Social:</i> Gamification of preventive messages and interaction with</p> |

1  
2  
3  
4  
5  
6  
7  
8  
9  
10  
11  
12  
13  
14  
15  
16  
17  
18  
19  
20  
21  
22  
23  
24  
25  
26  
27  
28  
29  
30  
31  
32  
33  
34  
35  
36  
37  
38  
39  
40  
41  
42  
43  
44  
45  
46  
47

|  |  |  |                                                              |                                                  |
|--|--|--|--------------------------------------------------------------|--------------------------------------------------|
|  |  |  | 65% of hot zones in the application at the end of the study. | others using the application<br><i>Cognitive</i> |
|--|--|--|--------------------------------------------------------------|--------------------------------------------------|

For peer review only

1  
2  
3  
4  
5  
6  
7  
8  
9  
10  
11  
12  
13  
14  
15  
16  
17  
18  
19  
20  
21  
22  
23  
24  
25  
26  
27  
28  
29  
30  
31  
32  
33  
34  
35  
36  
37  
38  
39  
40  
41  
42  
43  
44  
45  
46  
47

| <b>Appendix 3. Components of mobile health evidence reporting and assessment.</b> |                     |                   |                        |                     |                       |                     |                         |                       |                      |
|-----------------------------------------------------------------------------------|---------------------|-------------------|------------------------|---------------------|-----------------------|---------------------|-------------------------|-----------------------|----------------------|
|                                                                                   | Wright et al., 2021 | Owei et al., 2021 | Gustafson et al., 2014 | Nguyen et al., 2017 | Naughton et al., 2016 | Dorsch et al., 2020 | DeFilippis et al., 2017 | Connor & Herzig, 2016 | Besoain et al., 2020 |
| Infrastructure                                                                    |                     |                   |                        |                     |                       |                     |                         |                       |                      |
| Technology platform                                                               |                     |                   |                        |                     |                       |                     |                         |                       |                      |
| Interpretability/Health information systems context                               |                     |                   |                        |                     |                       |                     |                         |                       |                      |
| Intervention delivery                                                             |                     |                   |                        |                     |                       |                     |                         |                       |                      |
| Intervention content                                                              |                     |                   |                        |                     |                       |                     |                         |                       |                      |
| Usability/content testing                                                         |                     |                   |                        |                     |                       |                     |                         |                       |                      |
| User feedback                                                                     |                     |                   |                        |                     |                       |                     |                         |                       |                      |
| Access of individual participants                                                 |                     |                   |                        |                     |                       |                     |                         |                       |                      |
| Cost assessment                                                                   |                     |                   |                        |                     |                       |                     |                         |                       |                      |
| Adoption inputs/program entry                                                     |                     |                   |                        |                     |                       |                     |                         |                       |                      |
| Limitations for delivery at scale                                                 |                     |                   |                        |                     |                       |                     |                         |                       |                      |
| Contextual adaptability                                                           |                     |                   |                        |                     |                       |                     |                         |                       |                      |
| Replicability                                                                     |                     |                   |                        |                     |                       |                     |                         |                       |                      |
| Data security                                                                     |                     |                   |                        |                     |                       |                     |                         |                       |                      |
| Compliance with national guidelines or regulatory statutes                        |                     |                   |                        |                     |                       |                     |                         |                       |                      |



## Preferred Reporting Items for Systematic reviews and Meta-Analyses extension for Scoping Reviews (PRISMA-ScR) Checklist

| SECTION                                               | ITEM | PRISMA-ScR CHECKLIST ITEM                                                                                                                                                                                                                                                                                  | REPORTED ON PAGE # |
|-------------------------------------------------------|------|------------------------------------------------------------------------------------------------------------------------------------------------------------------------------------------------------------------------------------------------------------------------------------------------------------|--------------------|
| <b>TITLE</b>                                          |      |                                                                                                                                                                                                                                                                                                            |                    |
| Title                                                 | 1    | Identify the report as a scoping review.                                                                                                                                                                                                                                                                   |                    |
| <b>ABSTRACT</b>                                       |      |                                                                                                                                                                                                                                                                                                            |                    |
| Structured summary                                    | 2    | Provide a structured summary that includes (as applicable): background, objectives, eligibility criteria, sources of evidence, charting methods, results, and conclusions that relate to the review questions and objectives.                                                                              |                    |
| <b>INTRODUCTION</b>                                   |      |                                                                                                                                                                                                                                                                                                            |                    |
| Rationale                                             | 3    | Describe the rationale for the review in the context of what is already known. Explain why the review questions/objectives lend themselves to a scoping review approach.                                                                                                                                   |                    |
| Objectives                                            | 4    | Provide an explicit statement of the questions and objectives being addressed with reference to their key elements (e.g., population or participants, concepts, and context) or other relevant key elements used to conceptualize the review questions and/or objectives.                                  |                    |
| <b>METHODS</b>                                        |      |                                                                                                                                                                                                                                                                                                            |                    |
| Protocol and registration                             | 5    | Indicate whether a review protocol exists; state if and where it can be accessed (e.g., a Web address); and if available, provide registration information, including the registration number.                                                                                                             |                    |
| Eligibility criteria                                  | 6    | Specify characteristics of the sources of evidence used as eligibility criteria (e.g., years considered, language, and publication status), and provide a rationale.                                                                                                                                       |                    |
| Information sources*                                  | 7    | Describe all information sources in the search (e.g., databases with dates of coverage and contact with authors to identify additional sources), as well as the date the most recent search was executed.                                                                                                  |                    |
| Search                                                | 8    | Present the full electronic search strategy for at least 1 database, including any limits used, such that it could be repeated.                                                                                                                                                                            |                    |
| Selection of sources of evidence†                     | 9    | State the process for selecting sources of evidence (i.e., screening and eligibility) included in the scoping review.                                                                                                                                                                                      |                    |
| Data charting process‡                                | 10   | Describe the methods of charting data from the included sources of evidence (e.g., calibrated forms or forms that have been tested by the team before their use, and whether data charting was done independently or in duplicate) and any processes for obtaining and confirming data from investigators. |                    |
| Data items                                            | 11   | List and define all variables for which data were sought and any assumptions and simplifications made.                                                                                                                                                                                                     |                    |
| Critical appraisal of individual sources of evidence§ | 12   | If done, provide a rationale for conducting a critical appraisal of included sources of evidence; describe the methods used and how this information was used in any data synthesis (if appropriate).                                                                                                      |                    |
| Synthesis of results                                  | 13   | Describe the methods of handling and summarizing the data that were charted.                                                                                                                                                                                                                               |                    |

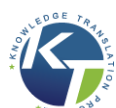

| SECTION                                       | ITEM | PRISMA-ScR CHECKLIST ITEM                                                                                                                                                                       | REPORTED ON PAGE # |
|-----------------------------------------------|------|-------------------------------------------------------------------------------------------------------------------------------------------------------------------------------------------------|--------------------|
| <b>RESULTS</b>                                |      |                                                                                                                                                                                                 |                    |
| Selection of sources of evidence              | 14   | Give numbers of sources of evidence screened, assessed for eligibility, and included in the review, with reasons for exclusions at each stage, ideally using a flow diagram.                    |                    |
| Characteristics of sources of evidence        | 15   | For each source of evidence, present characteristics for which data were charted and provide the citations.                                                                                     |                    |
| Critical appraisal within sources of evidence | 16   | If done, present data on critical appraisal of included sources of evidence (see item 12).                                                                                                      |                    |
| Results of individual sources of evidence     | 17   | For each included source of evidence, present the relevant data that were charted that relate to the review questions and objectives.                                                           |                    |
| Synthesis of results                          | 18   | Summarize and/or present the charting results as they relate to the review questions and objectives.                                                                                            |                    |
| <b>DISCUSSION</b>                             |      |                                                                                                                                                                                                 |                    |
| Summary of evidence                           | 19   | Summarize the main results (including an overview of concepts, themes, and types of evidence available), link to the review questions and objectives, and consider the relevance to key groups. |                    |
| Limitations                                   | 20   | Discuss the limitations of the scoping review process.                                                                                                                                          |                    |
| Conclusions                                   | 21   | Provide a general interpretation of the results with respect to the review questions and objectives, as well as potential implications and/or next steps.                                       |                    |
| <b>FUNDING</b>                                |      |                                                                                                                                                                                                 |                    |
| Funding                                       | 22   | Describe sources of funding for the included sources of evidence, as well as sources of funding for the scoping review. Describe the role of the funders of the scoping review.                 |                    |

JBI = Joanna Briggs Institute; PRISMA-ScR = Preferred Reporting Items for Systematic reviews and Meta-Analyses extension for Scoping Reviews.

\* Where *sources of evidence* (see second footnote) are compiled from, such as bibliographic databases, social media platforms, and Web sites.

† A more inclusive/heterogeneous term used to account for the different types of evidence or data sources (e.g., quantitative and/or qualitative research, expert opinion, and policy documents) that may be eligible in a scoping review as opposed to only studies. This is not to be confused with *information sources* (see first footnote).

‡ The frameworks by Arksey and O'Malley (6) and Levac and colleagues (7) and the JBI guidance (4, 5) refer to the process of data extraction in a scoping review as data charting.

§ The process of systematically examining research evidence to assess its validity, results, and relevance before using it to inform a decision. This term is used for items 12 and 19 instead of "risk of bias" (which is more applicable to systematic reviews of interventions) to include and acknowledge the various sources of evidence that may be used in a scoping review (e.g., quantitative and/or qualitative research, expert opinion, and policy document).

From: Tricco AC, Lillie E, Zarin W, O'Brien KK, Colquhoun H, Levac D, et al. PRISMA Extension for Scoping Reviews (PRISMA-ScR): Checklist and Explanation. *Ann Intern Med.* 2018;169:467–473. doi: [10.7326/M18-0850](https://doi.org/10.7326/M18-0850).

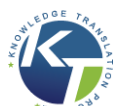

Supplement: bmjopen-2022-069374.draft_revisions.pdf [file bmjopen-2022-069374.draft_revisions.pdf]
